# Supplementary material for: Experimental and quantum-mechanical investigation of the vinylsilane-iminium ion cyclizationElectronic supplementary information (ESI) available: experimental procedures, spectroscopic data and copies of 13C NMR spectra for compounds 4–16. Selected bond lengths in geometry optimized structures of α-substituted (Z)-vinylsilanes. Cartesian coordinates, raw energies and lower frequencies of computationally characterized species 17A–32H. See http://www.rsc.org/suppdata/ob/b2/b212333a/
Source: Royal Society of Chemistry journal article supplement (doi:10.1039/b212333a), 2003-02-24
Supplement: b212333a.pdf [file b212333a.pdf]

**Experimental and quantum-mechanical investigation  
of the vinylsilane-iminium ion cyclization**

Lisbet Kværnø, Per-Ola Norrby and David Tanner\*

**Electronic Supplementary Information**

Copies of  $^{13}\text{C}$  NMR spectra for compounds **4-16**

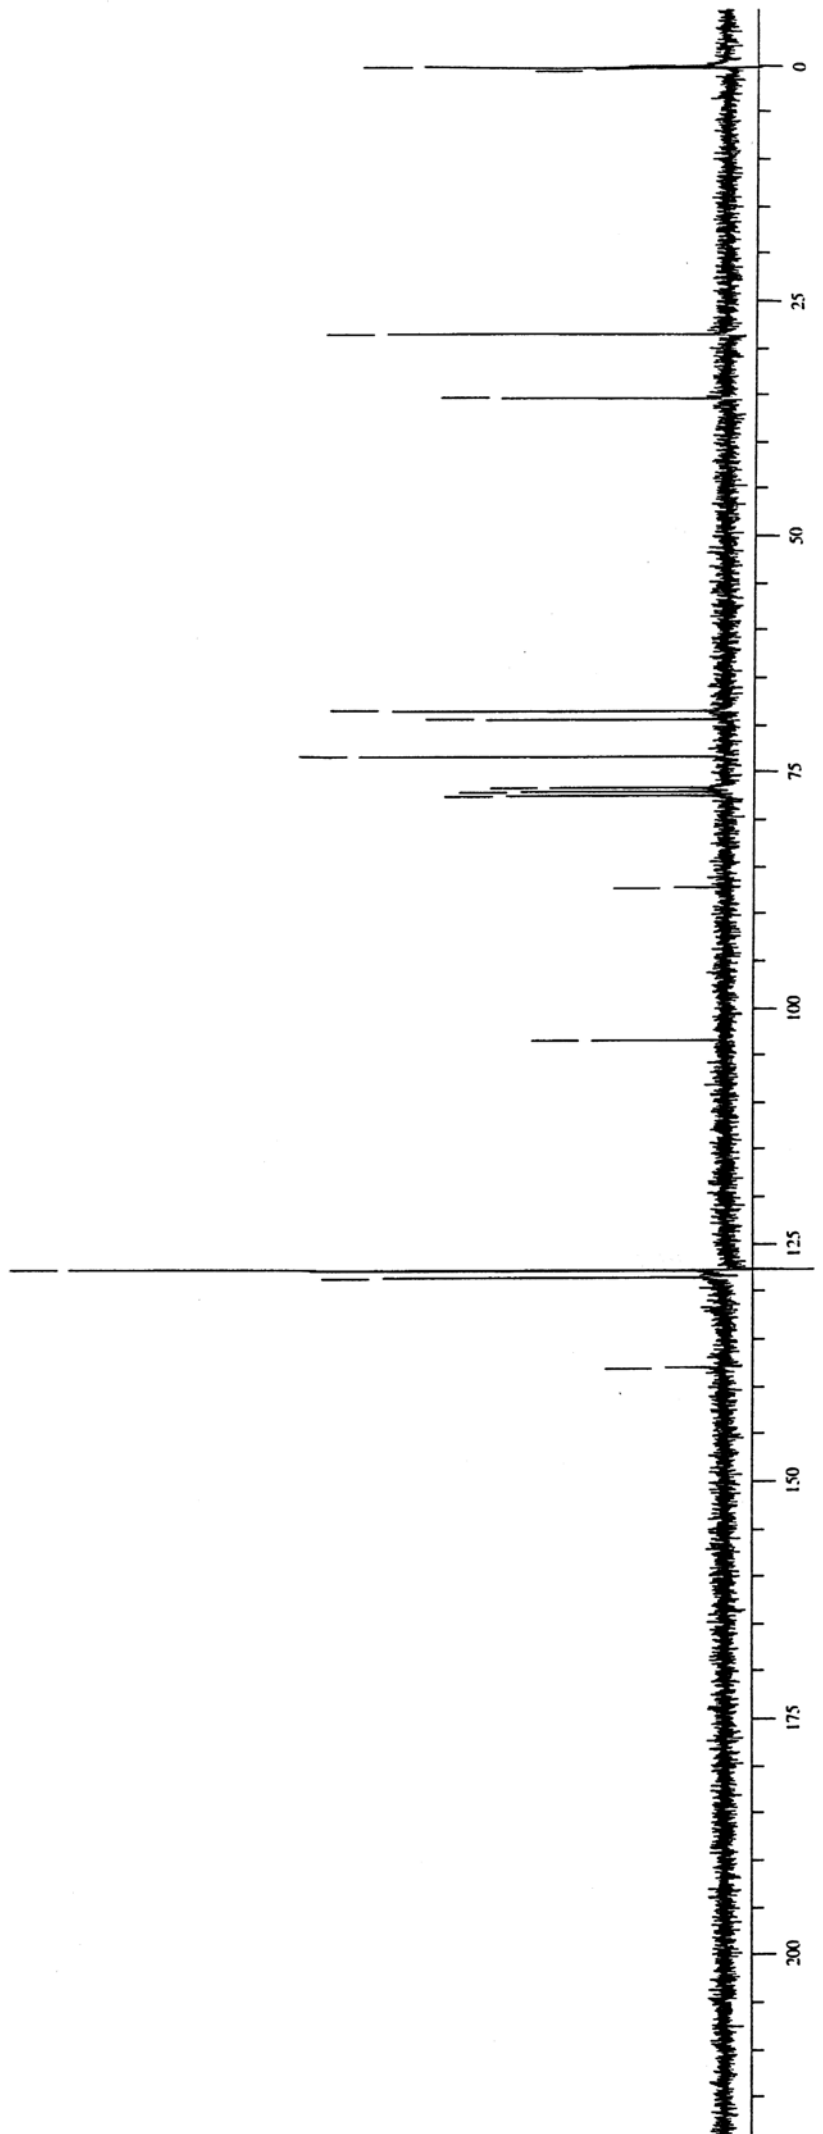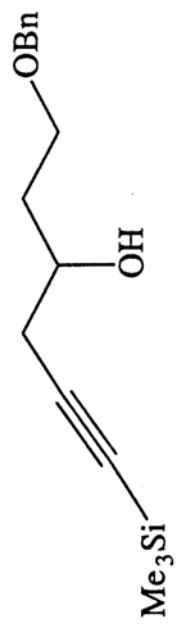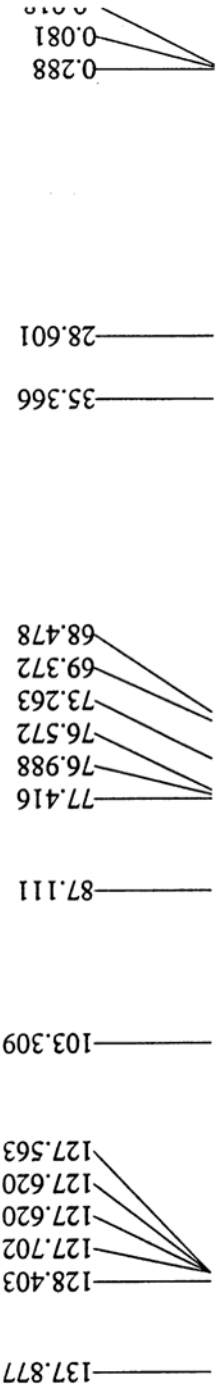

0.247  
 -0.096  
 26.663  
 34.171  
 38.350  
 65.480  
 73.030  
 76.563  
 76.987  
 77.400  
 78.104  
 88.101  
 101.013  
 127.675  
 127.675  
 127.715  
 128.376  
 128.376  
 128.376  
 137.920

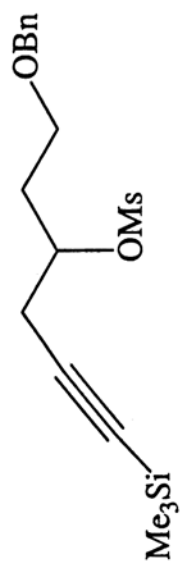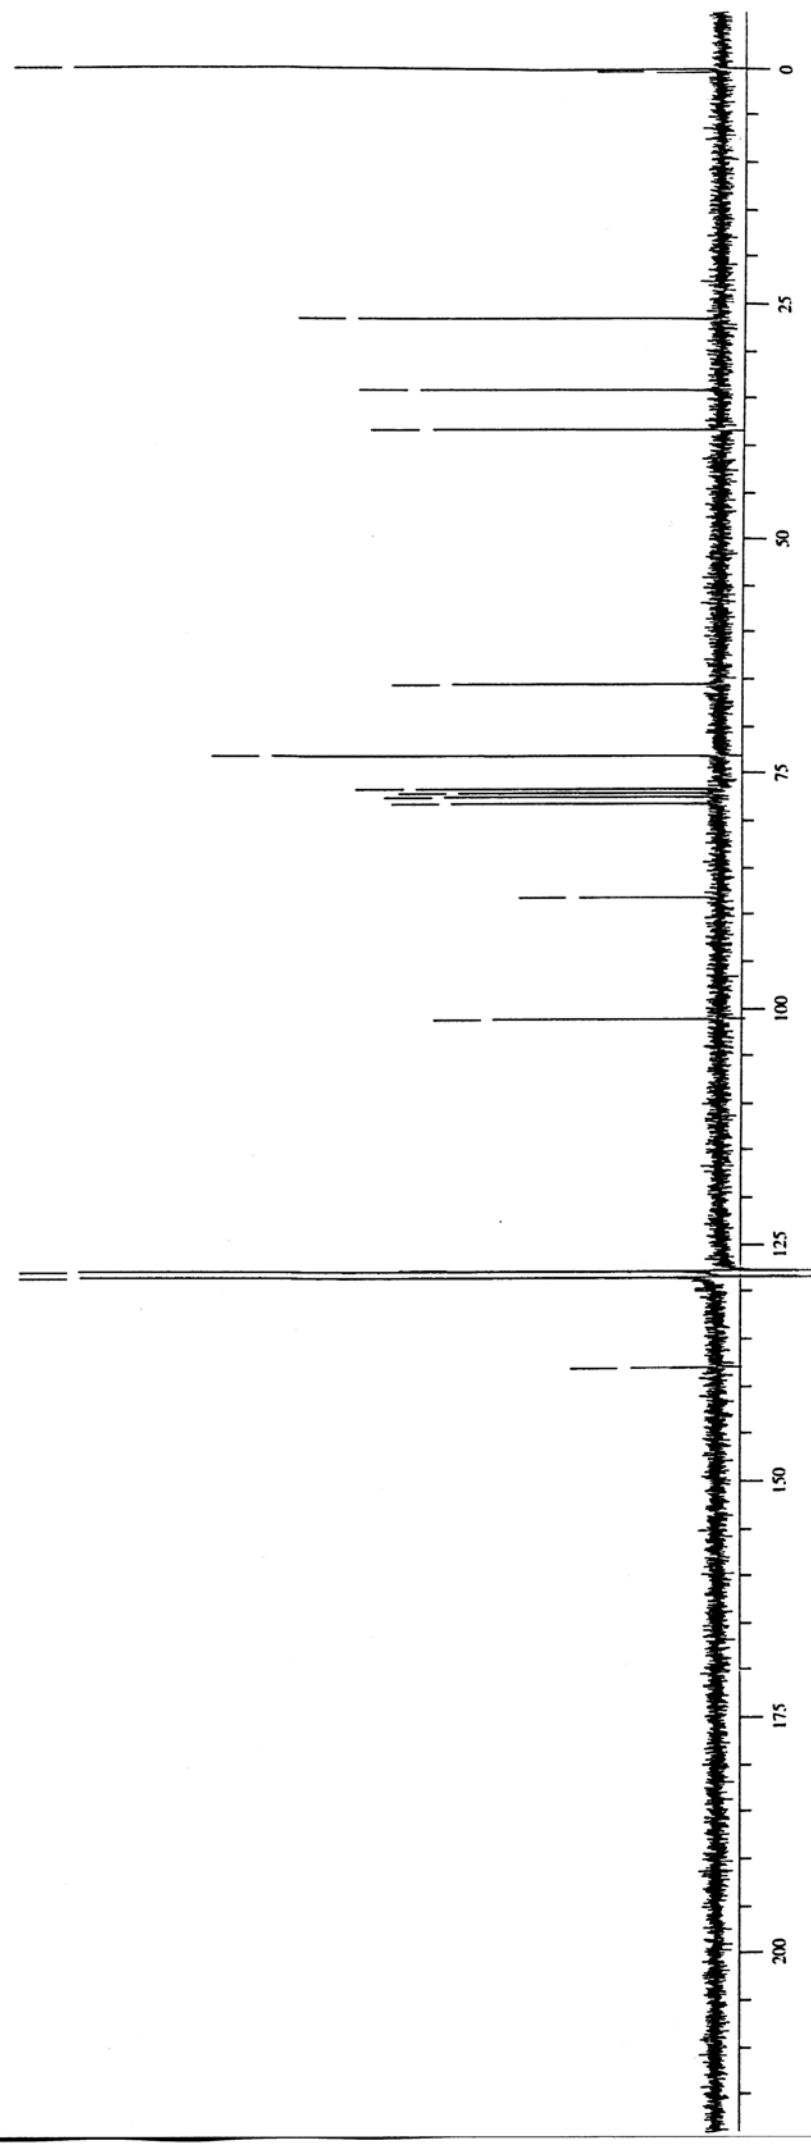

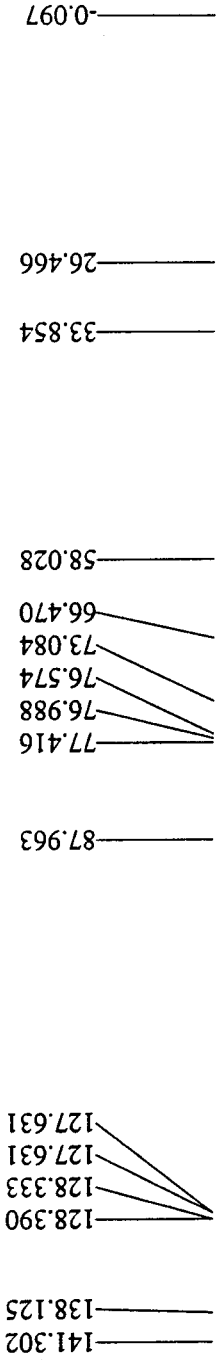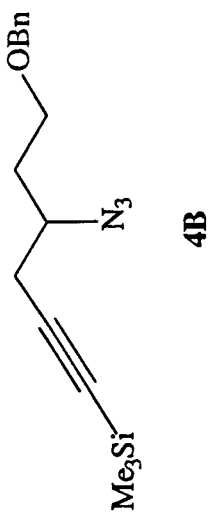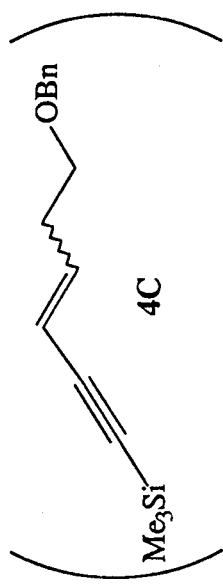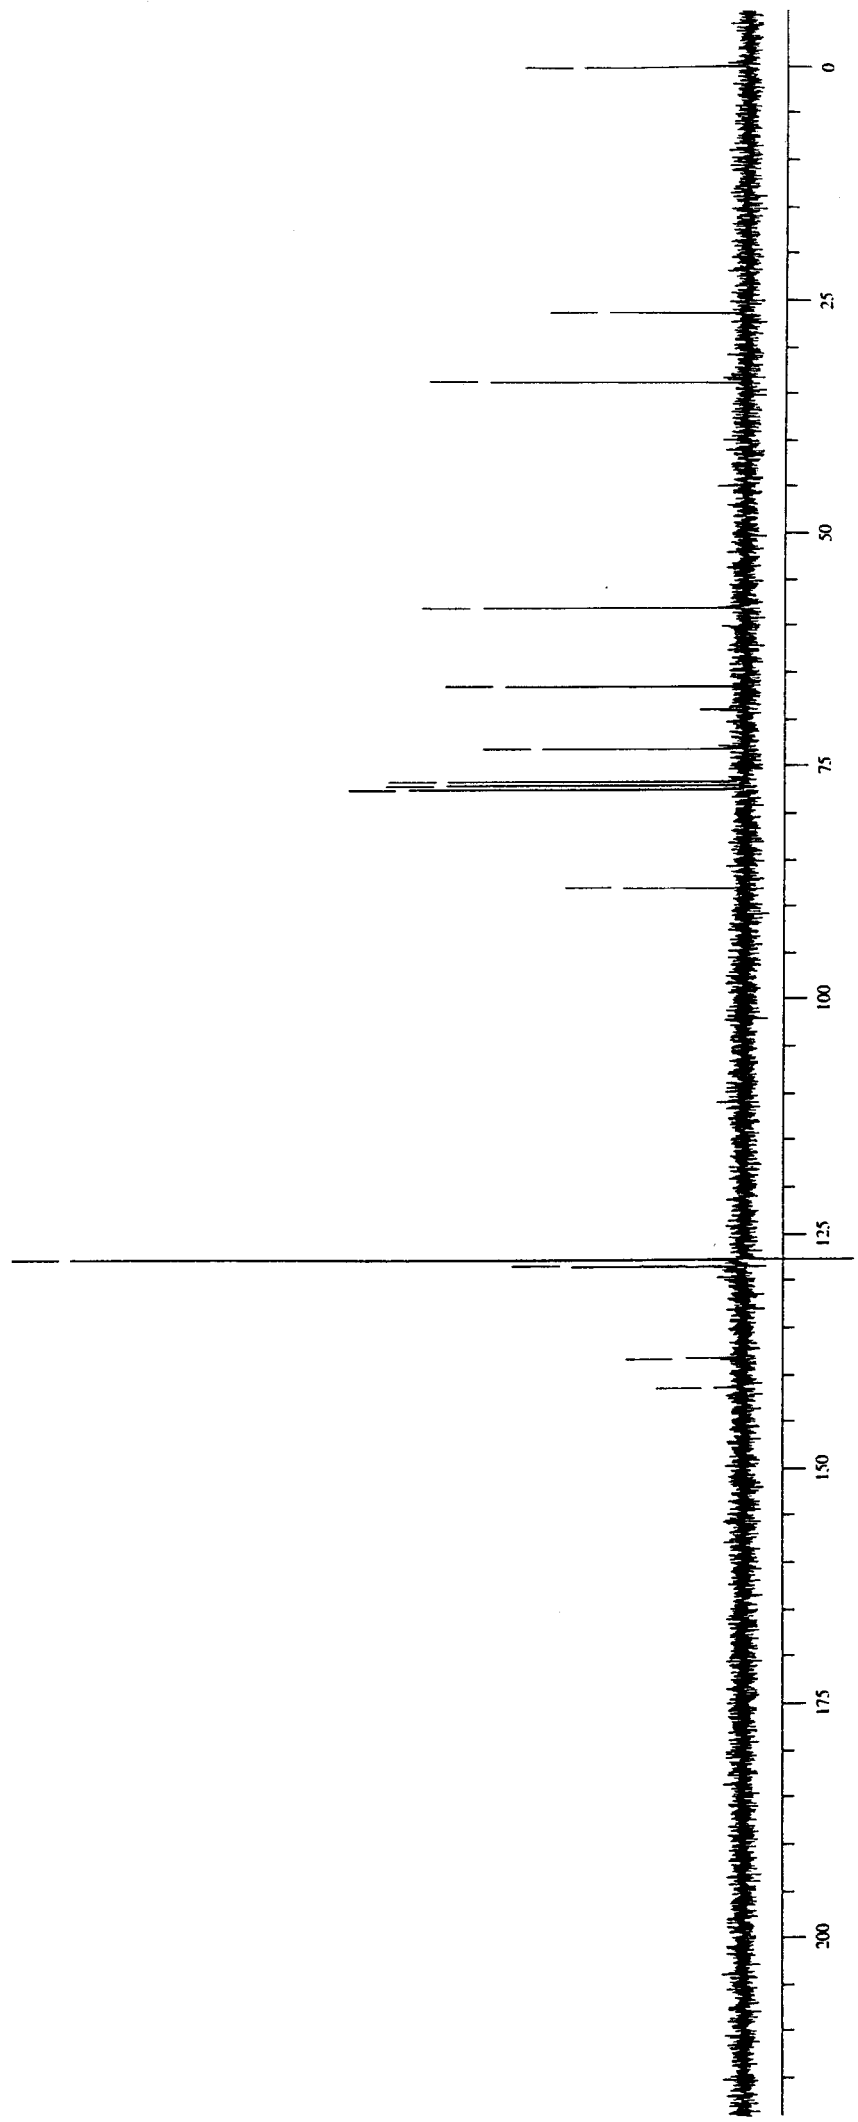

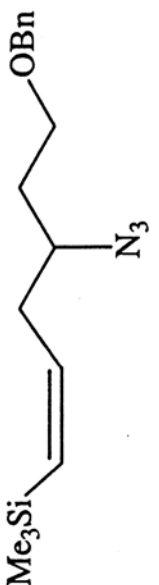

5

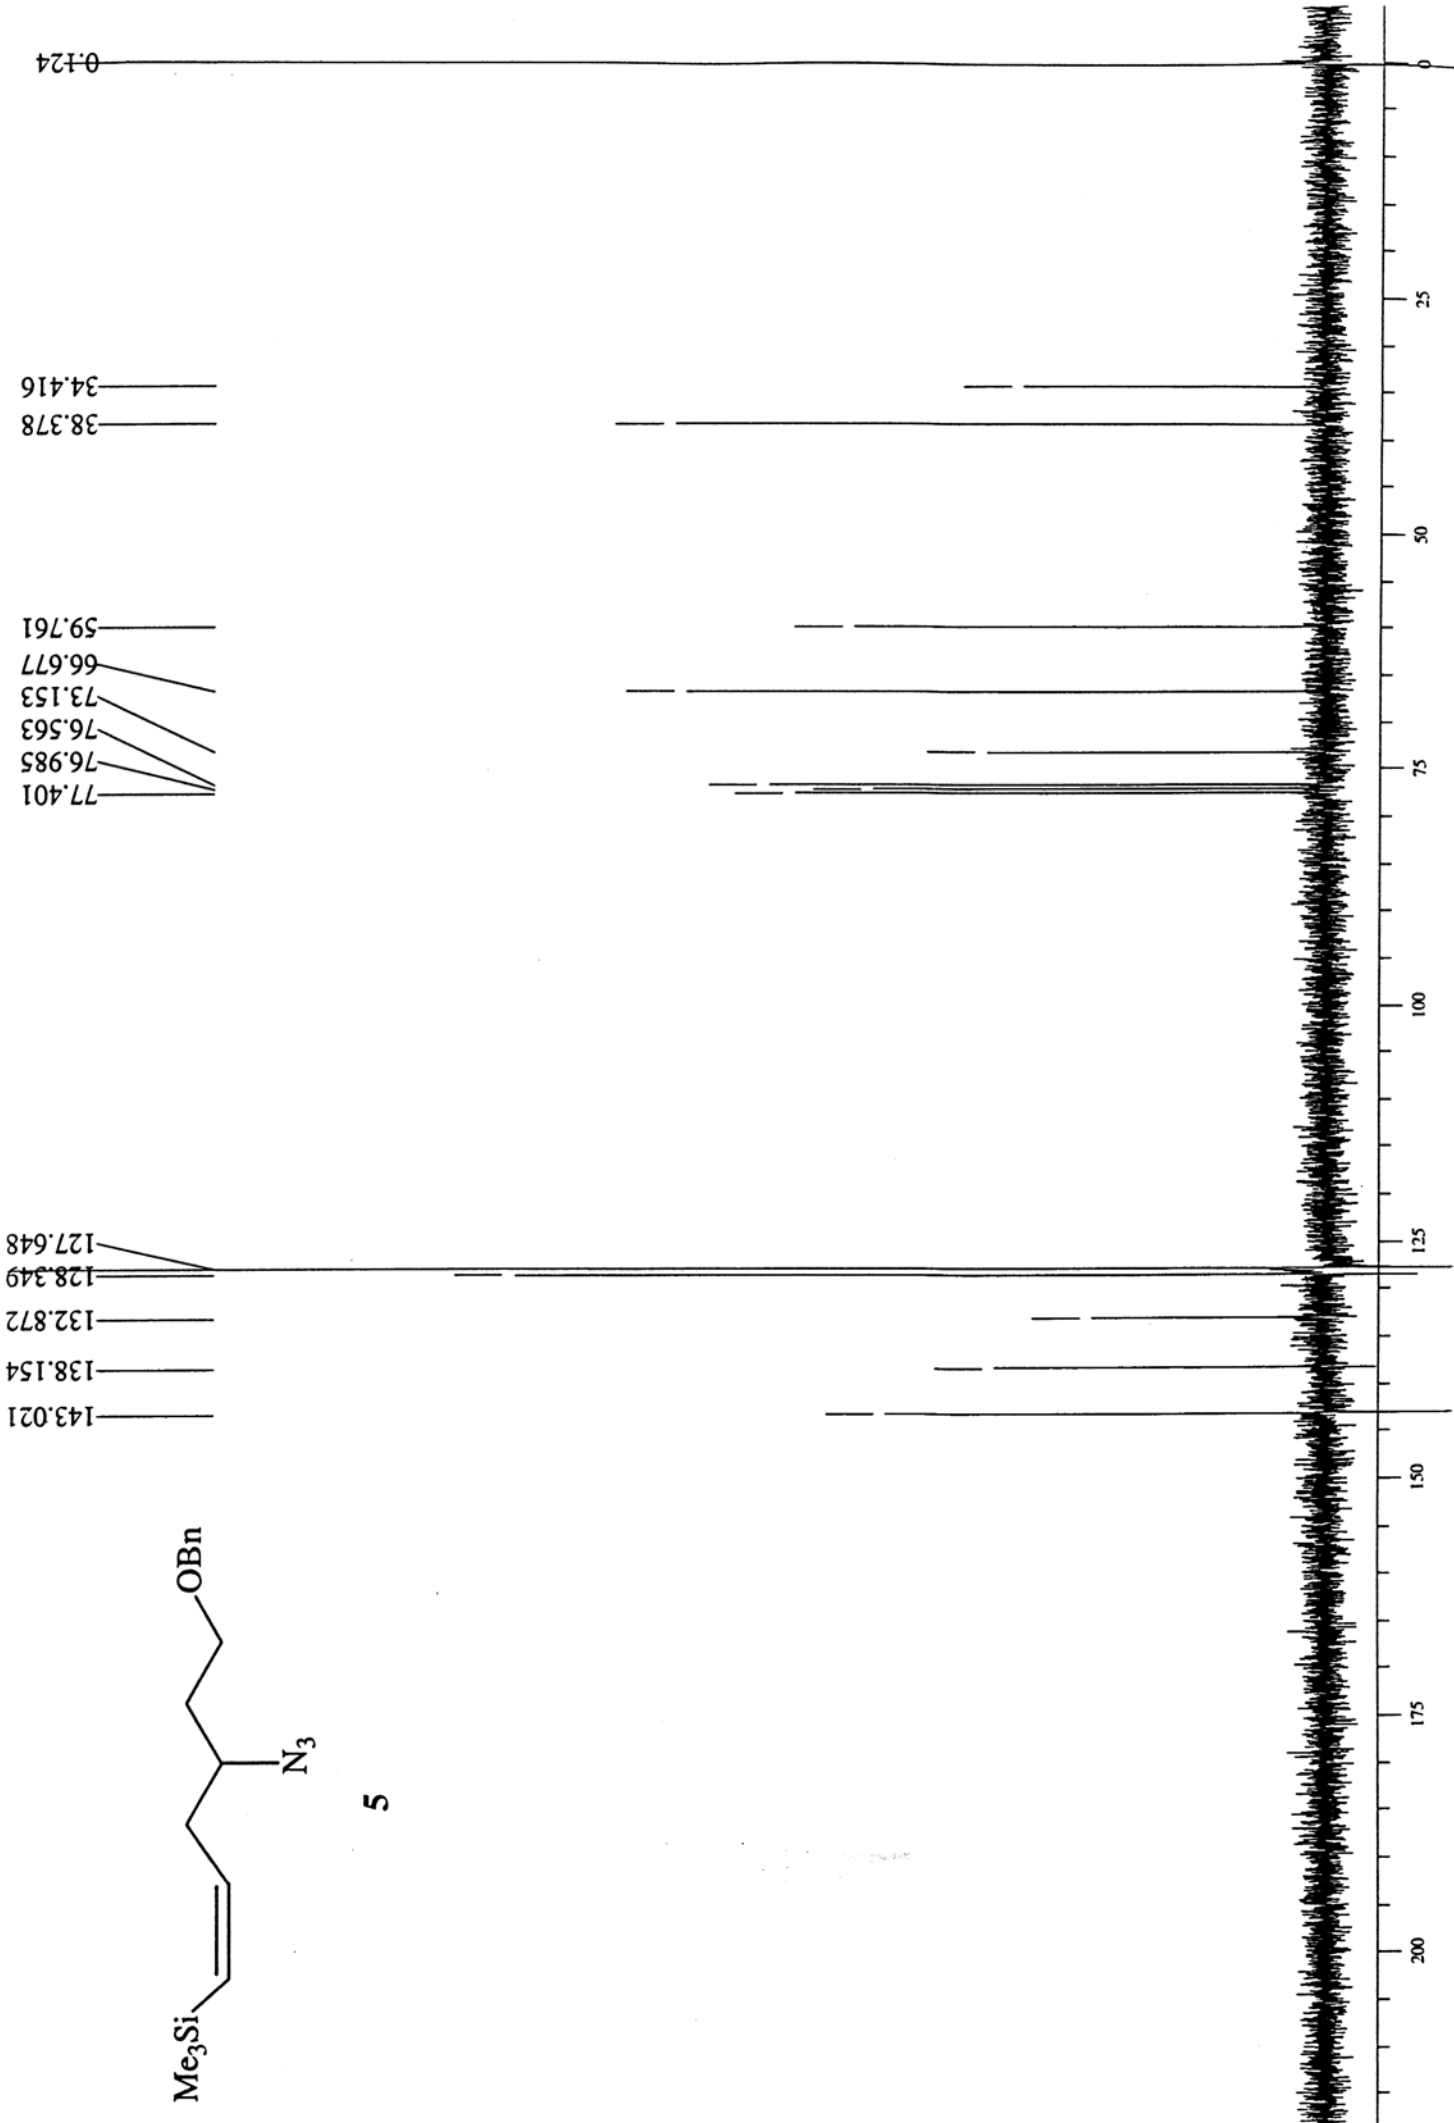

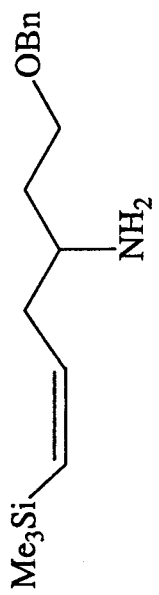

**9**

- 145.262
- 138.360
- 131.839
- 128.308
- 127.565
- 127.497
- 77.415
- 76.989
- 76.564
- 73.003
- 68.037
- 49.392
- 41.801
- 37.122
- 0.275

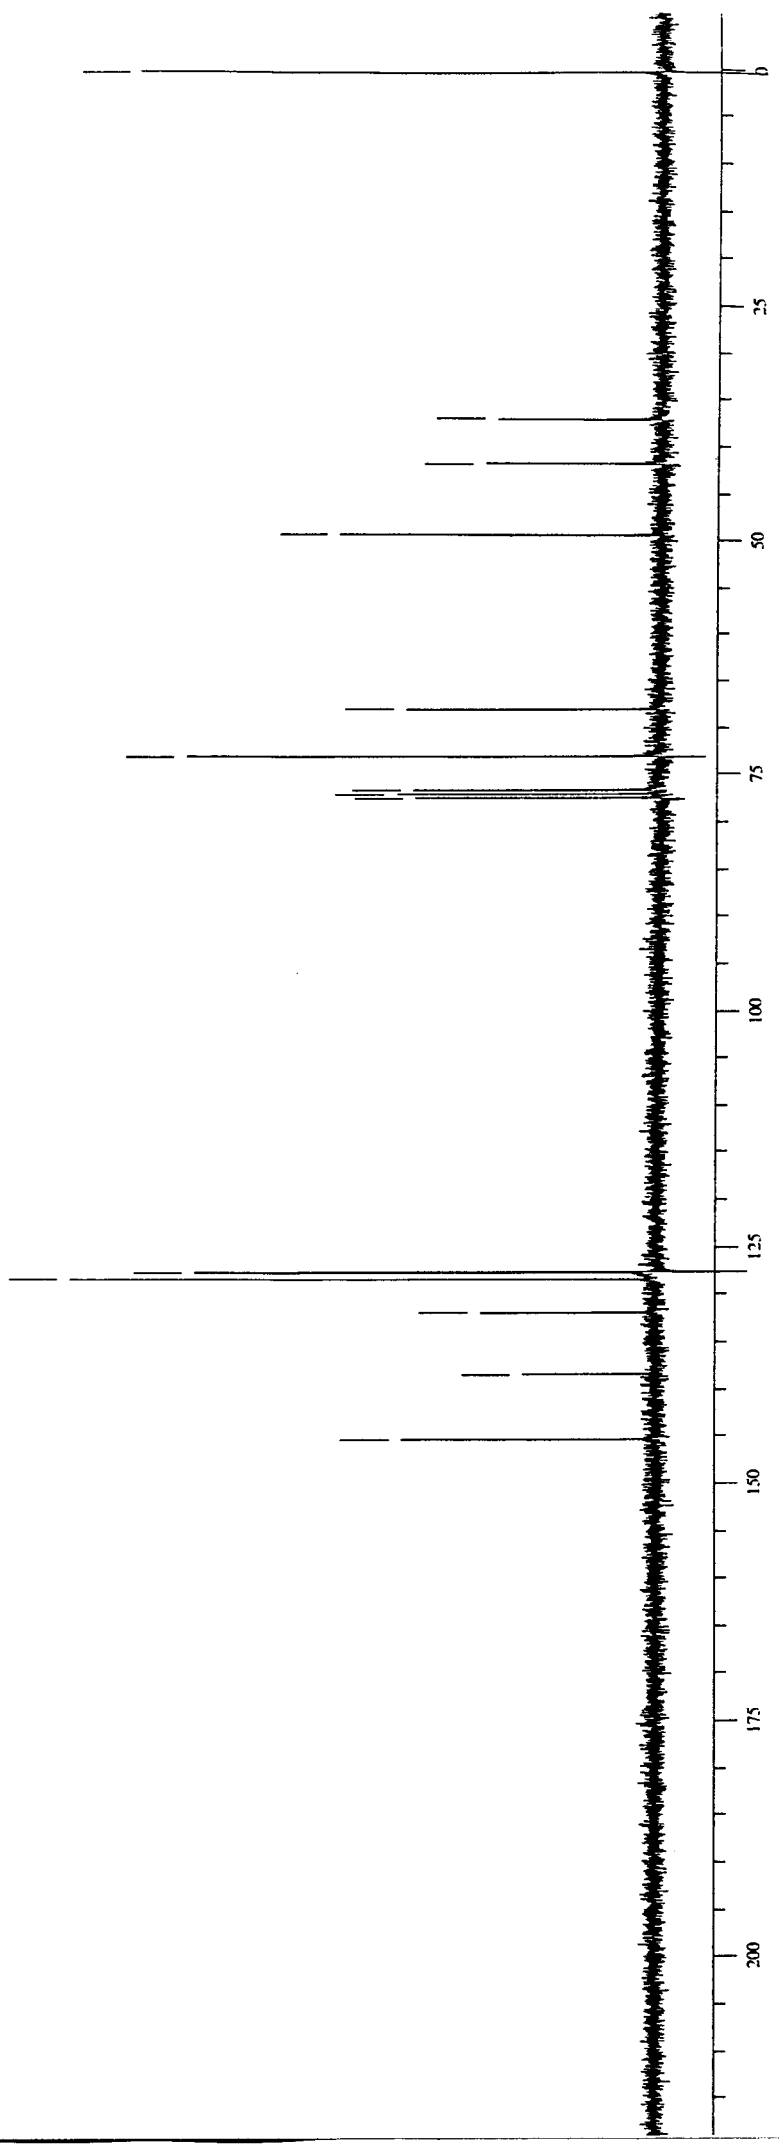

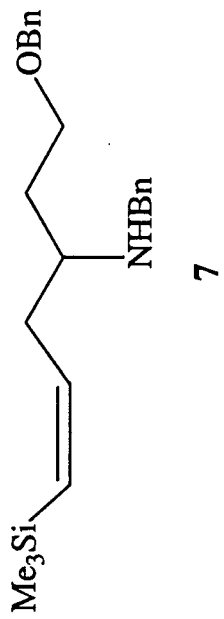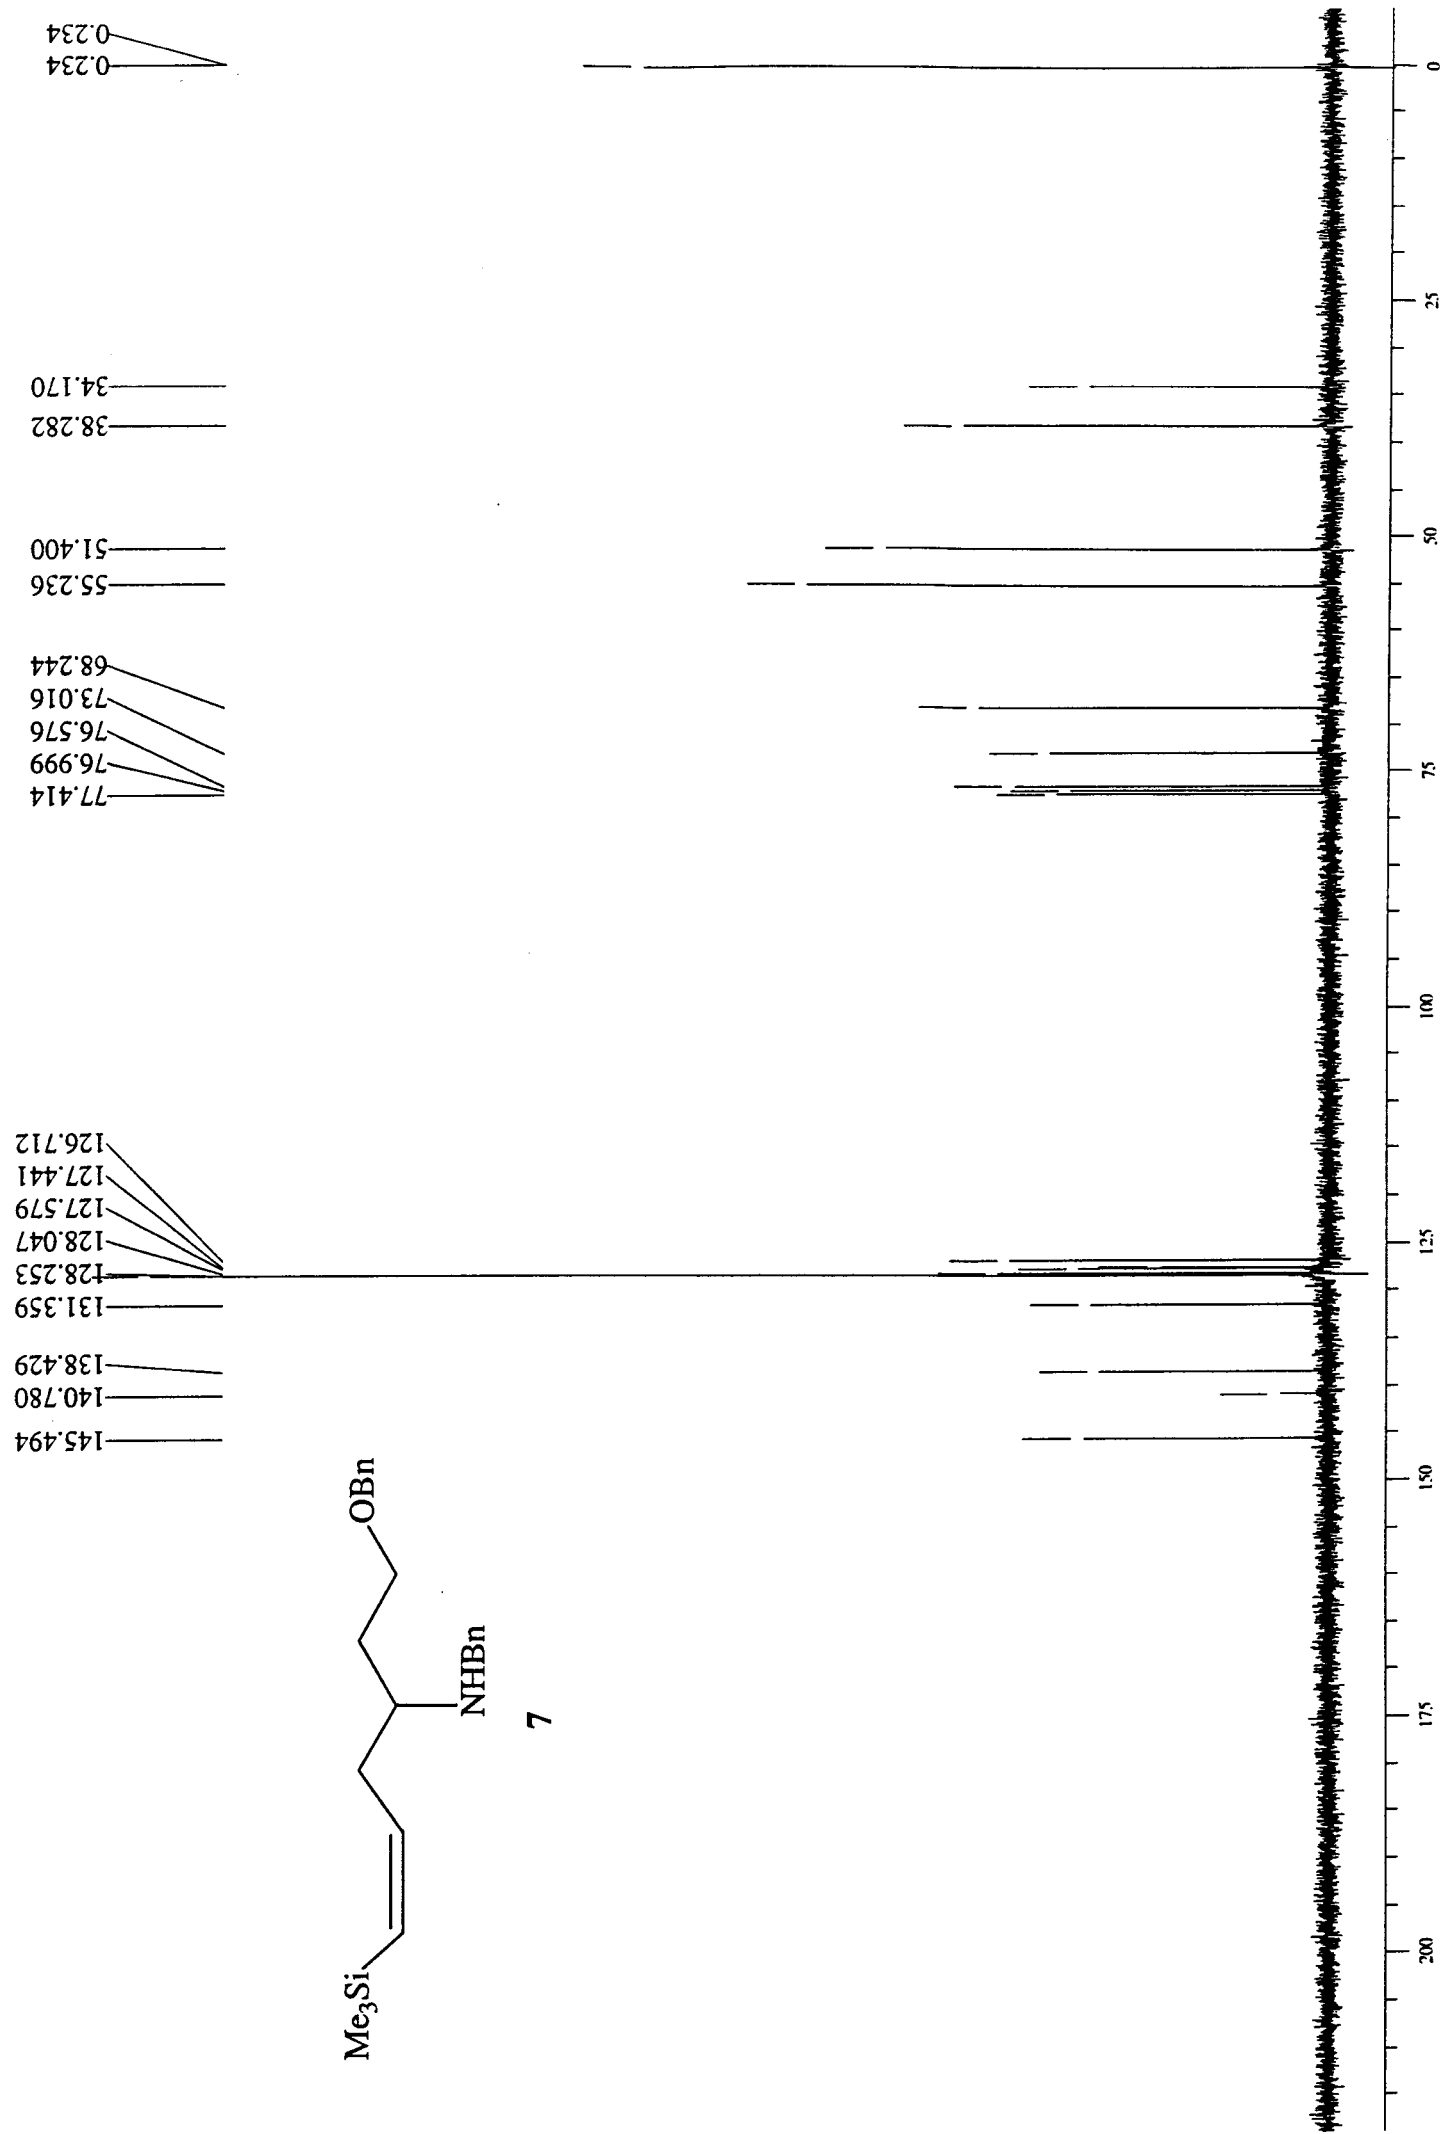

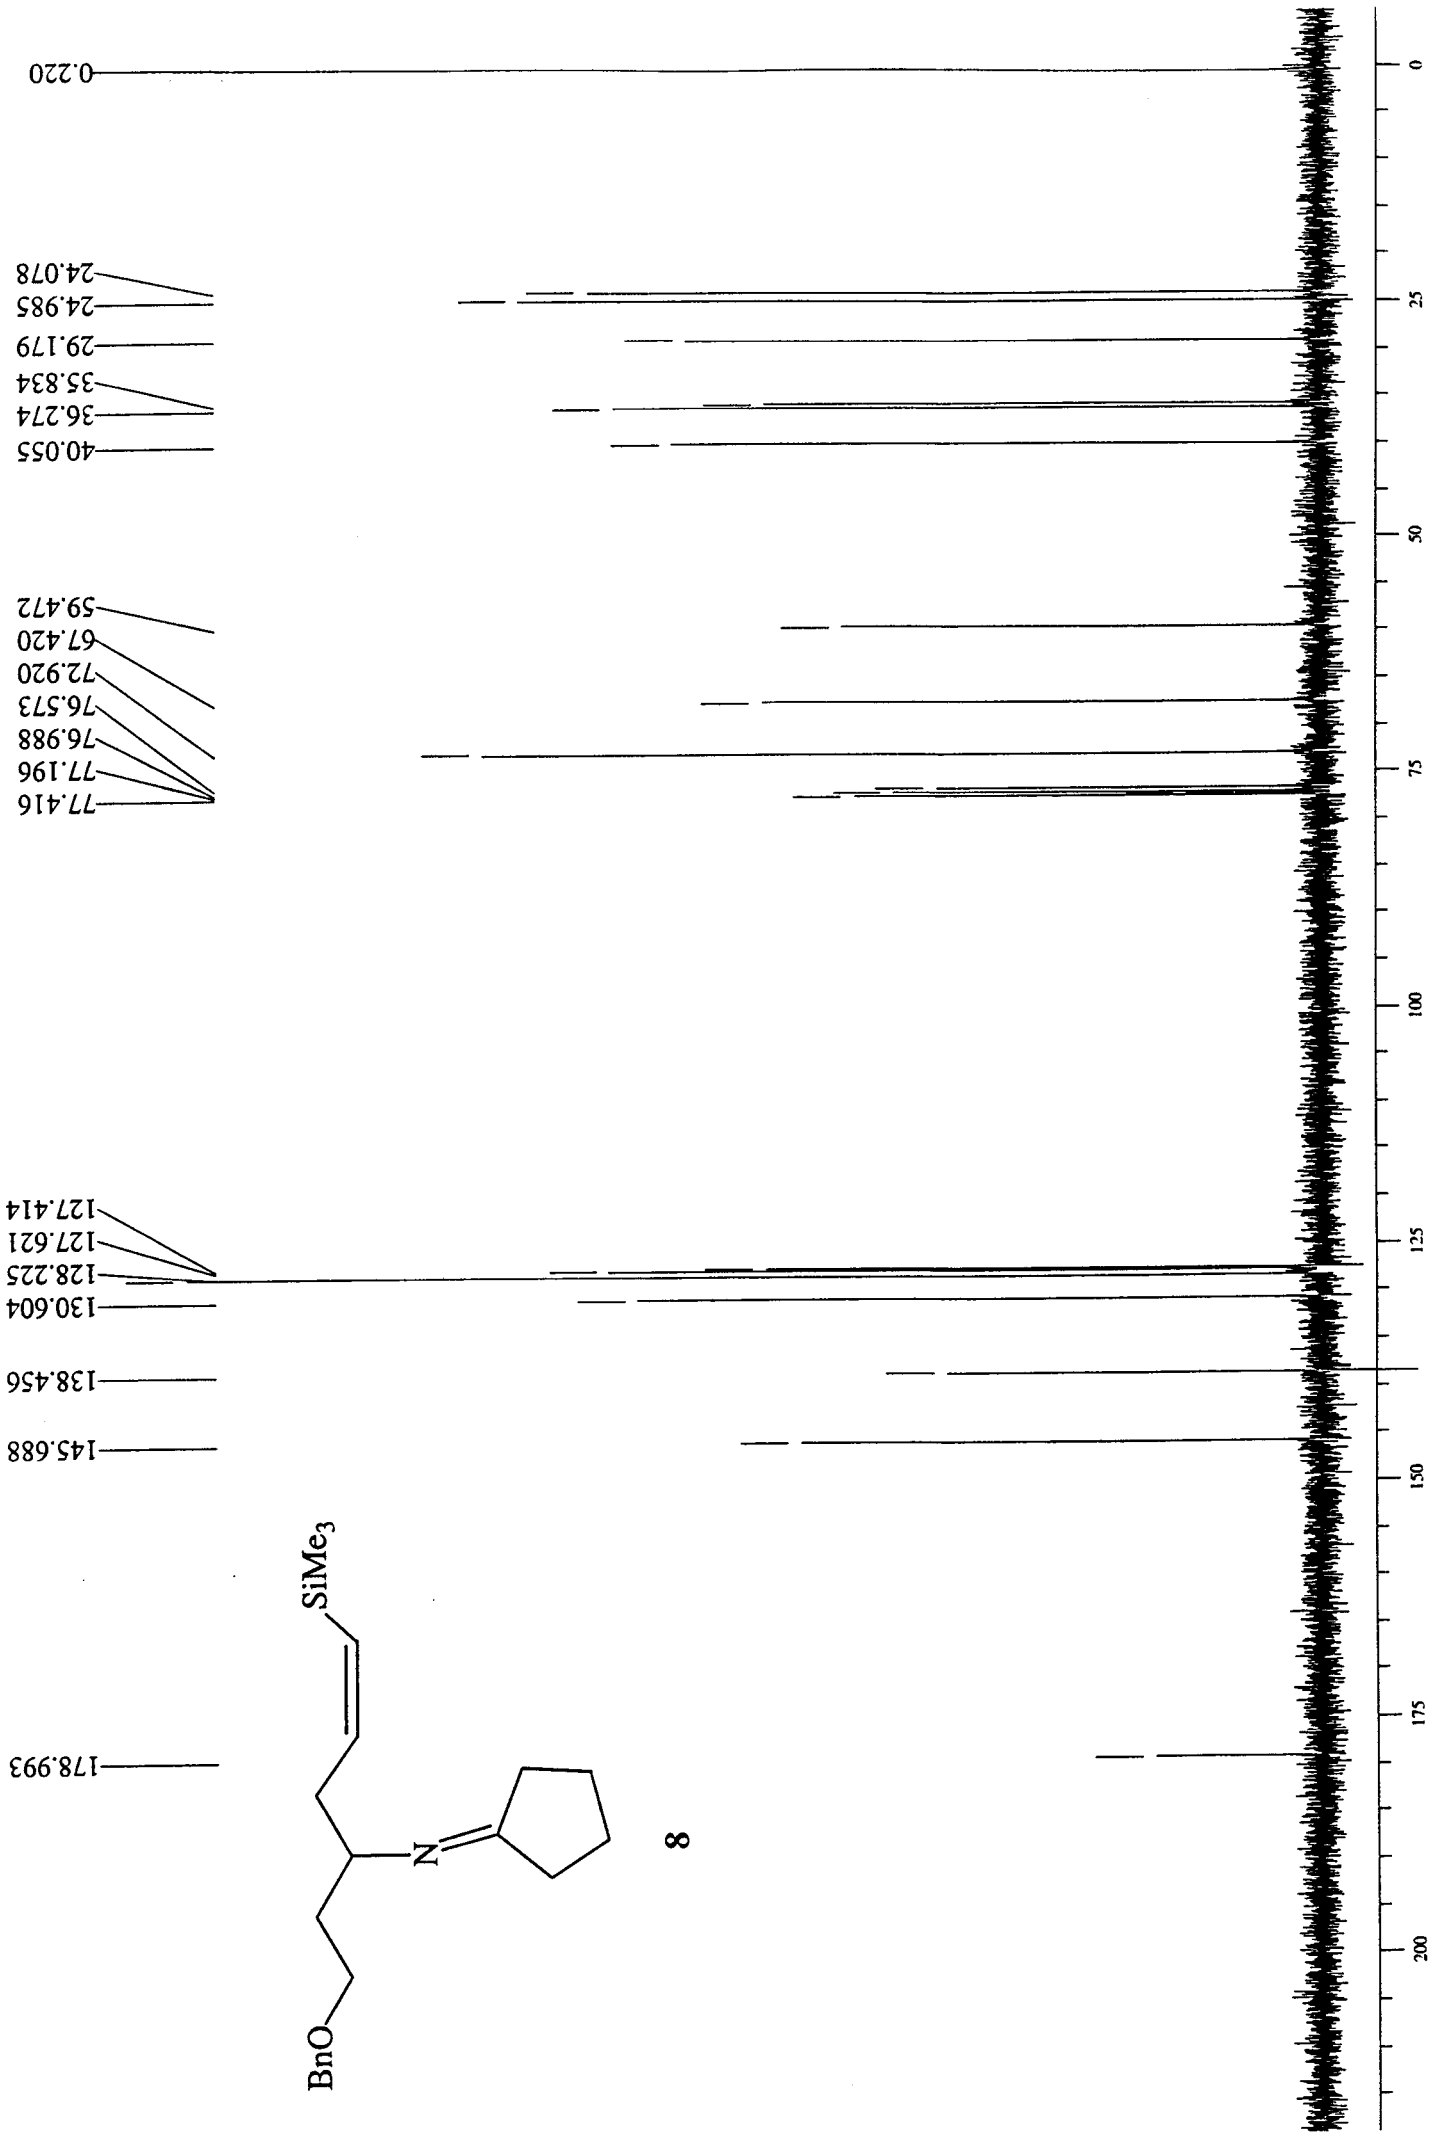



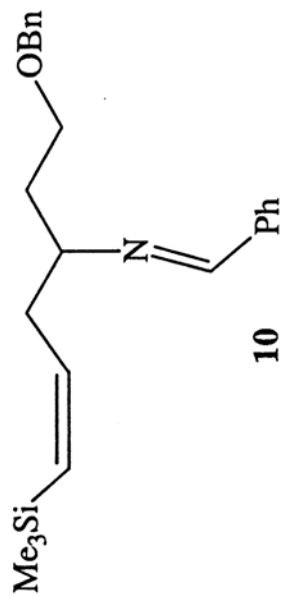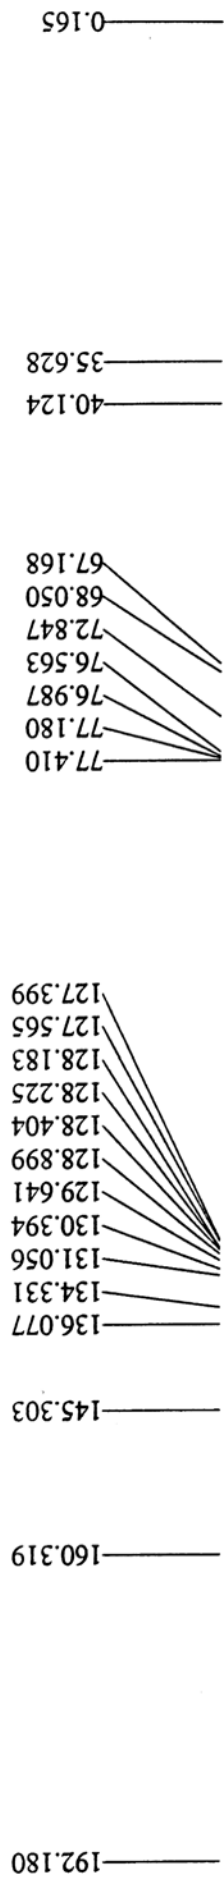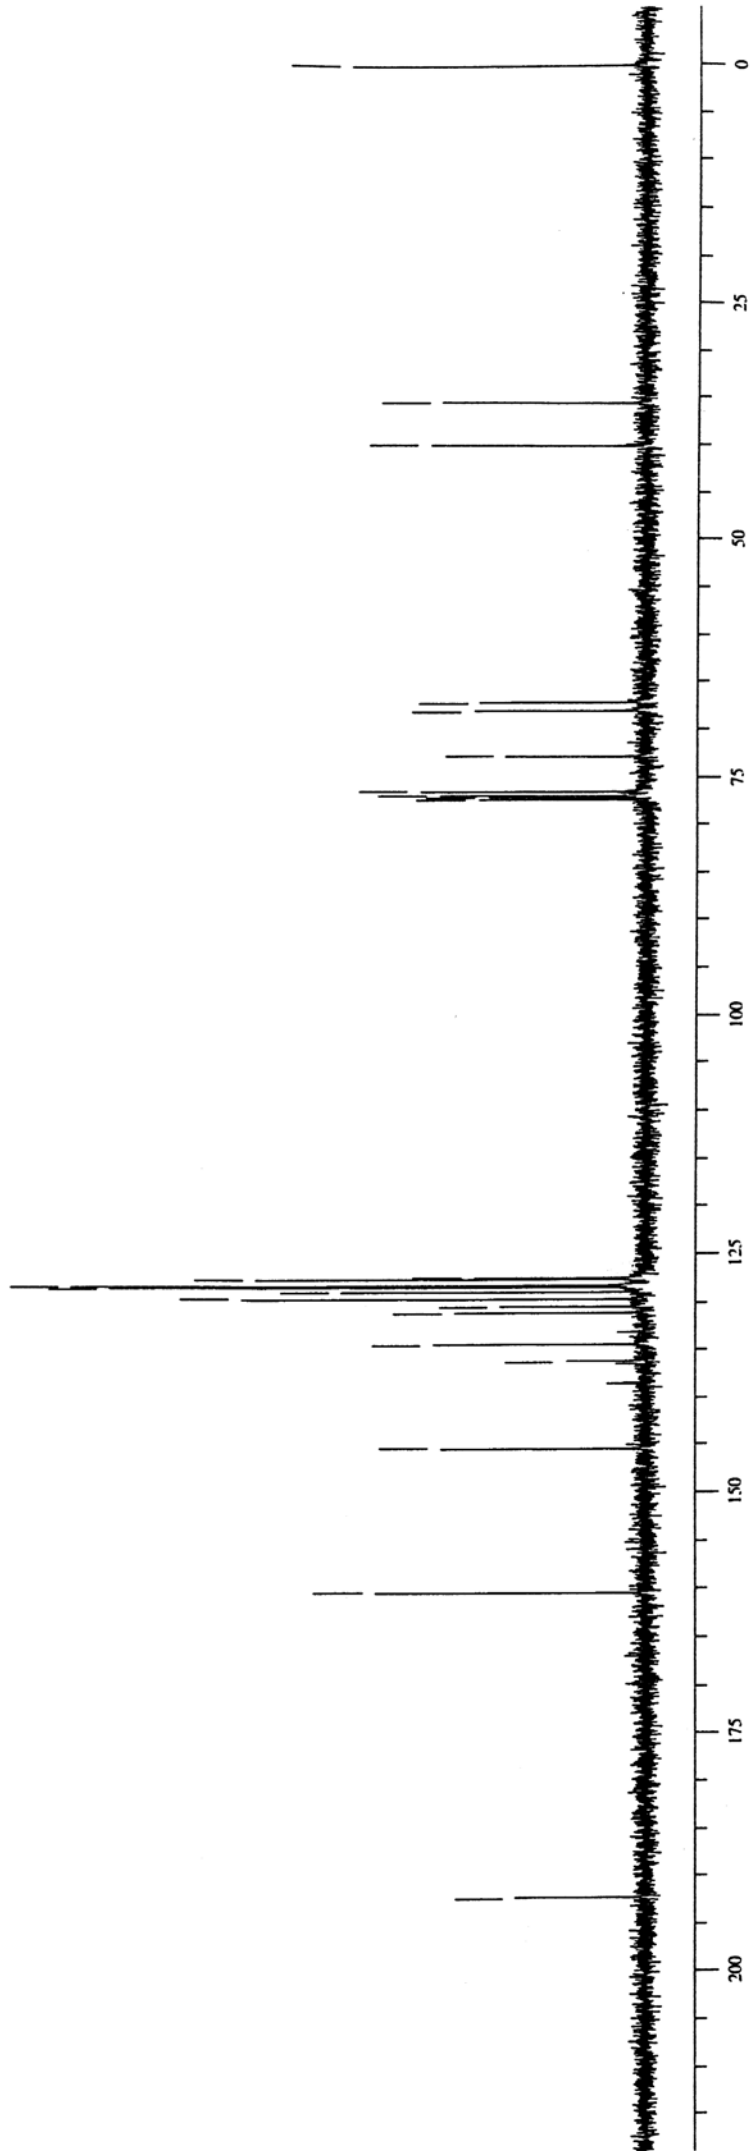

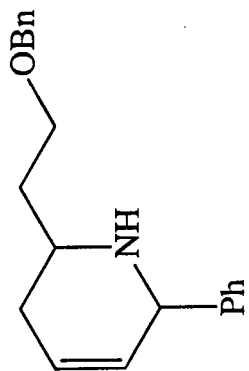

11A

32.245  
36.356

52.238  
60.145  
67.996  
72.947  
76.561  
76.867  
76.990  
77.345  
77.415

125.778  
127.234  
127.522  
127.592  
127.662  
128.335  
128.445  
130.302

143.831  
147.531

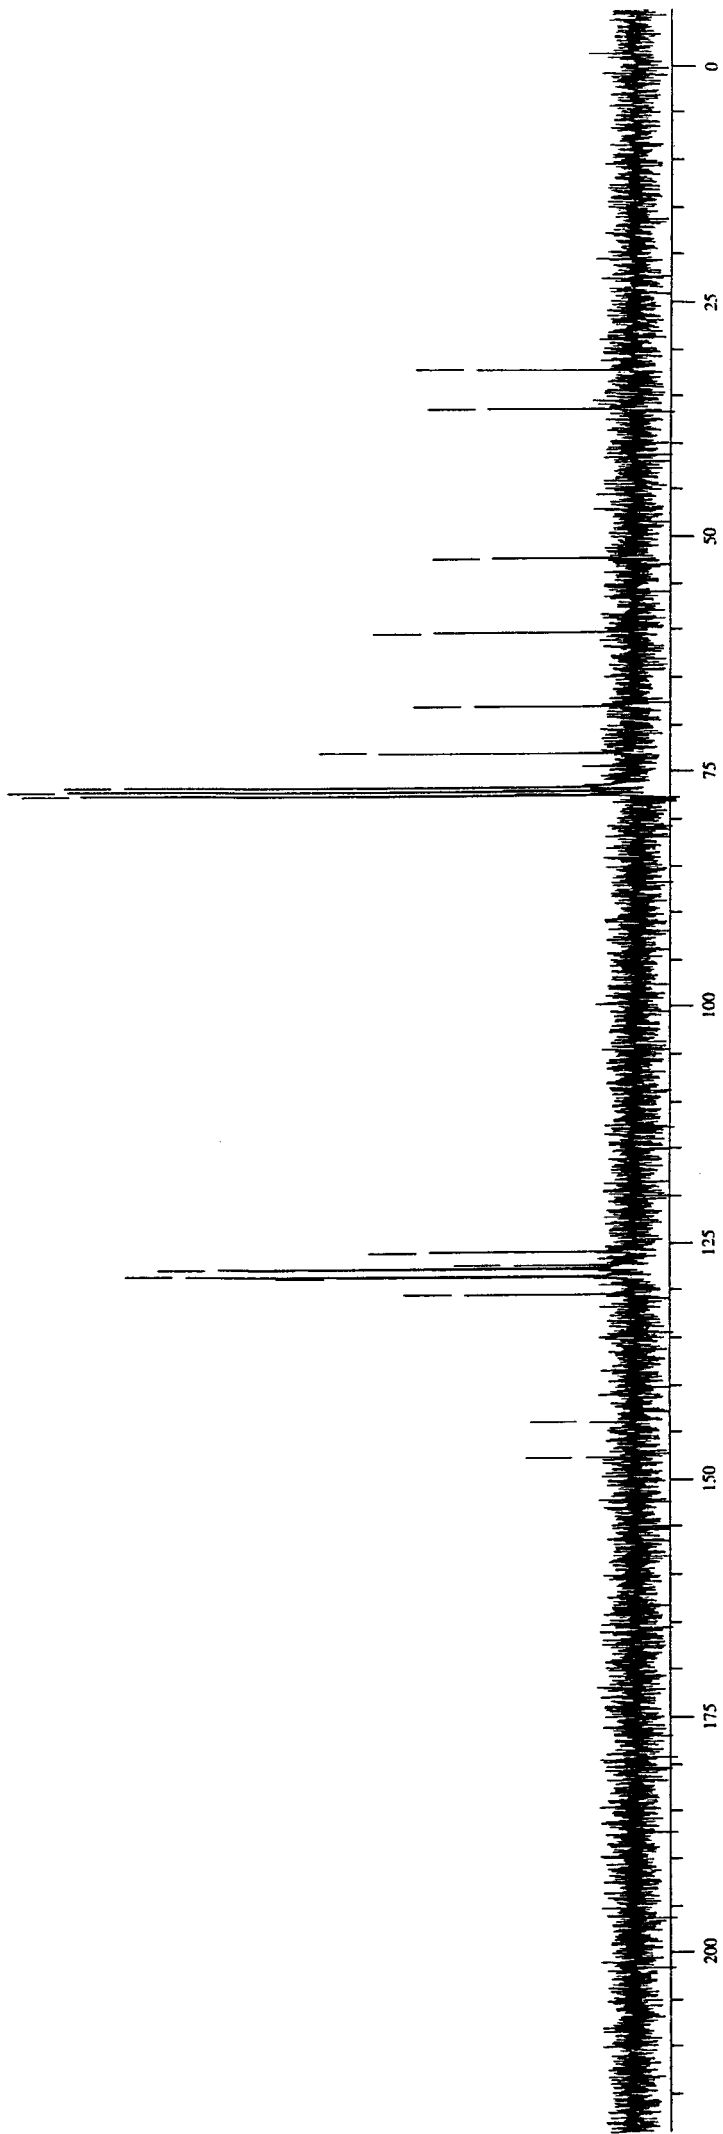

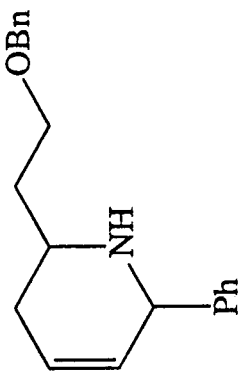

11B

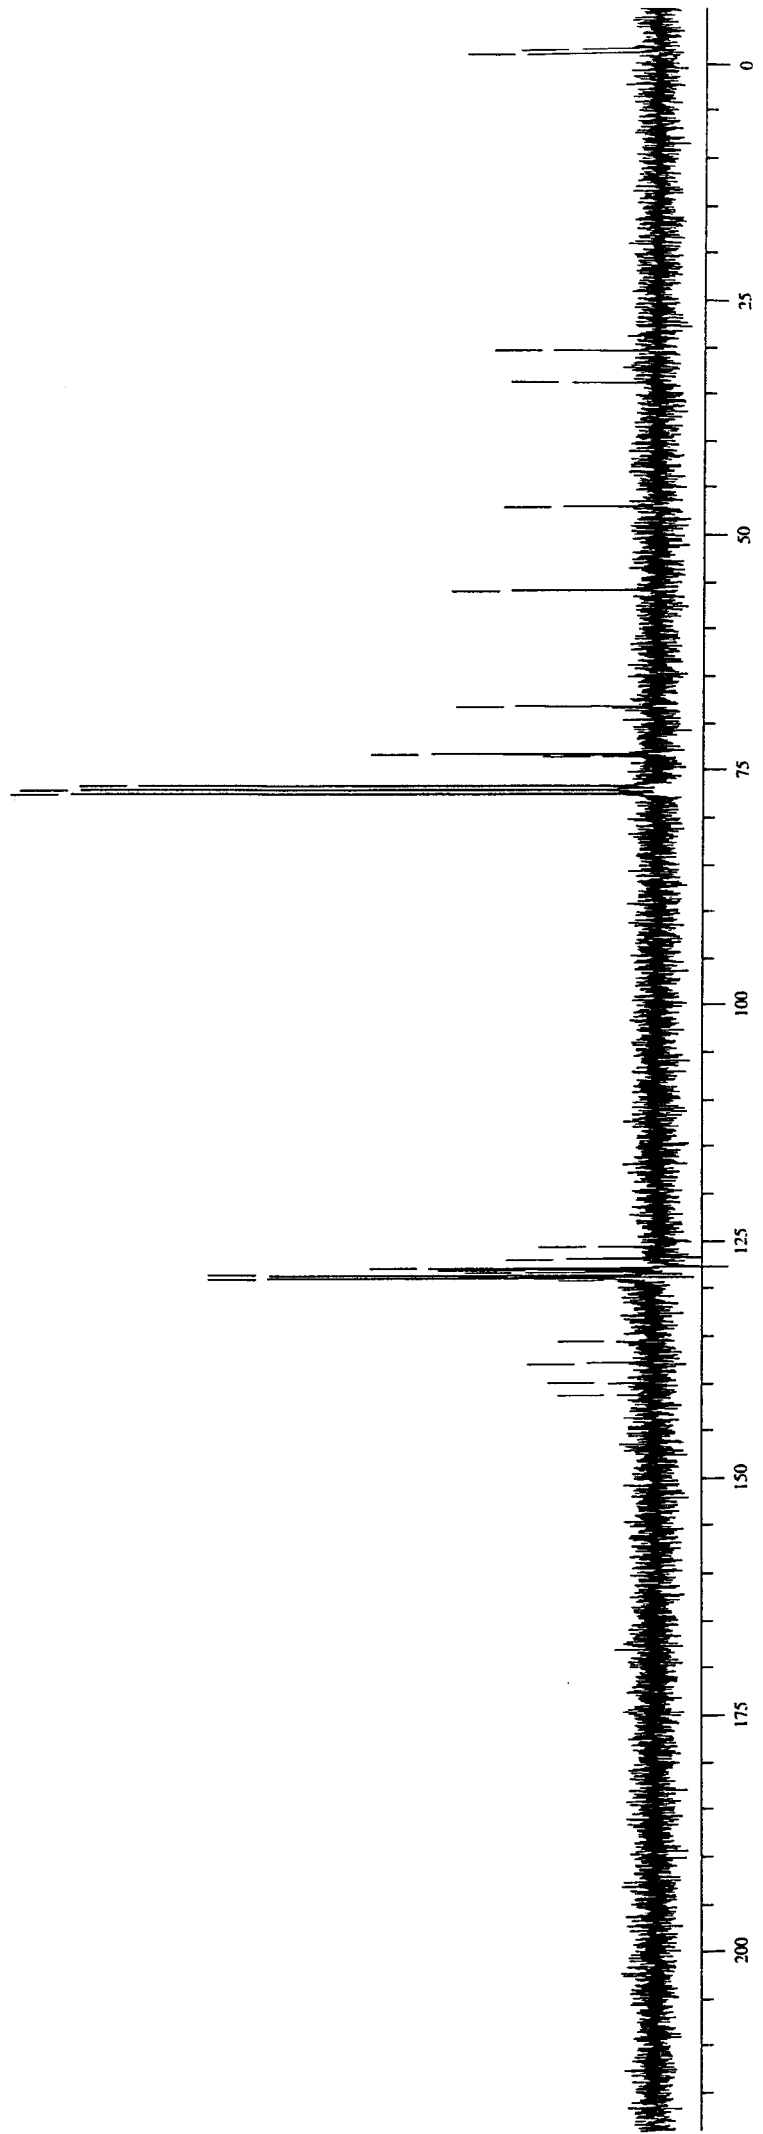

- 1.320
- 1.789
- 30.414
- 33.826
- 46.926
- 55.745
- 68.134
- 68.217
- 73.194
- 73.345
- 73.511
- 76.560
- 76.990
- 77.416
- 125.446
- 126.616
- 126.642
- 127.561
- 127.633
- 127.661
- 127.756
- 127.854
- 127.990
- 128.101
- 128.361
- 128.498
- 128.564
- 128.665
- 128.772
- 129.045
- 135.443
- 137.672
- 139.856
- 141.103

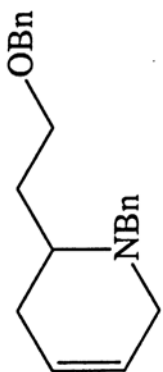

12

29.067  
27.940

56.377  
52.803  
47.797

77.416  
76.988  
76.571  
72.934  
68.203

128.720  
128.267  
128.102  
127.538  
127.414  
126.685  
125.008  
124.141

139.694  
138.552

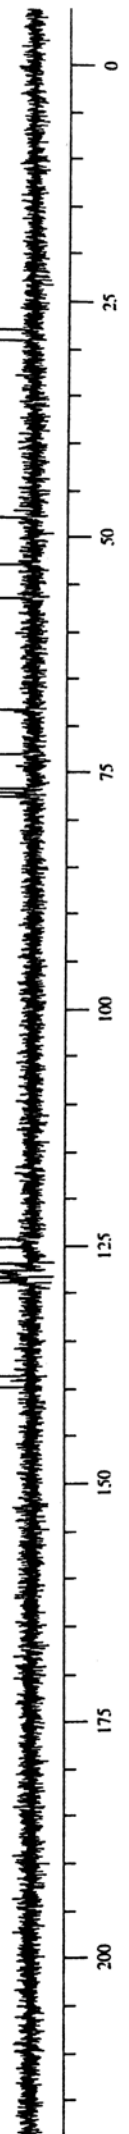

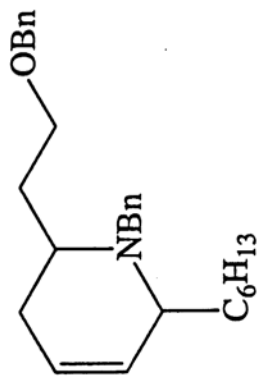

14.108  
 22.647  
 26.291  
 26.828  
 26.910  
 29.219  
 31.846  
 31.887  
 32.245  
 34.019  
  
 48.316  
 49.626  
  
 56.859  
 68.060  
 72.865  
 73.057  
 76.562  
 76.990  
 77.416  
  
 124.994  
 126.383  
 127.414  
 127.565  
 127.632  
 127.892  
 128.266  
 128.404  
 128.720  
 129.779  
  
 138.621  
 140.917

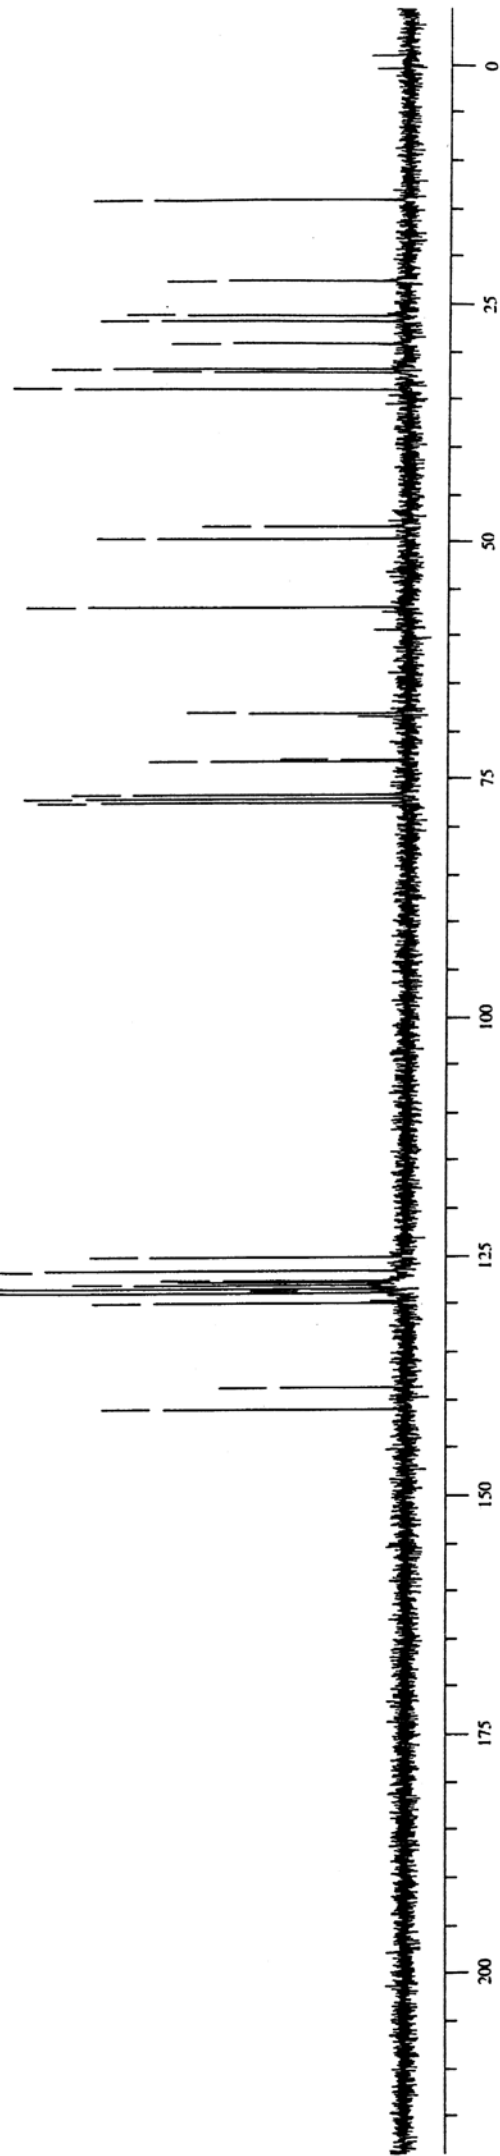

28.434  
28.226

51.314  
48.512

60.901  
68.410  
72.891  
76.563  
76.988  
77.411

124.760  
126.602  
126.738  
127.359  
127.565  
128.047  
128.088  
128.170  
128.225  
128.390  
128.596  
128.734

138.511  
140.312  
143.557

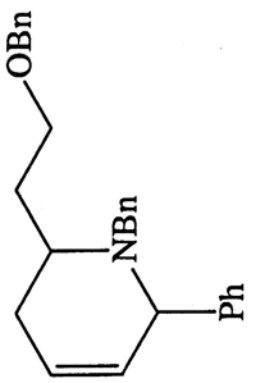

14

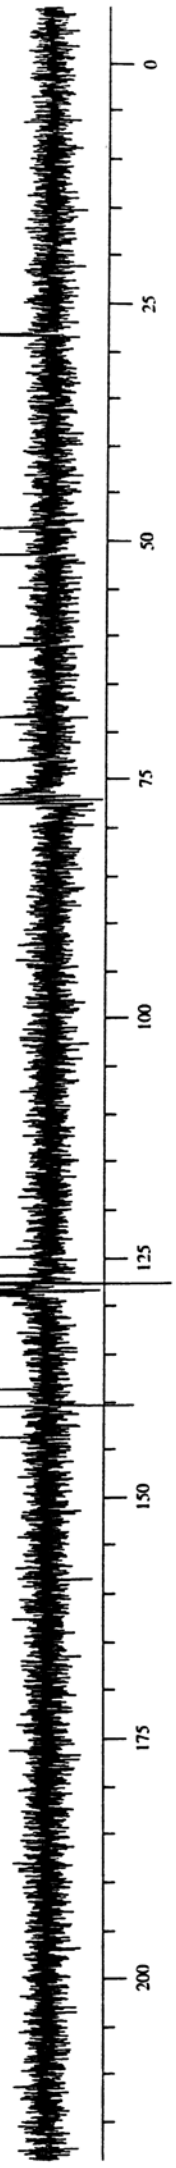

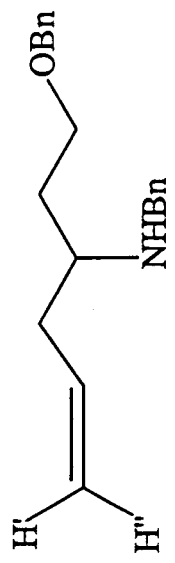

15B

- 140.697
- 138.455
- 135.444
- 128.267
- 128.102
- 127.566
- 127.441
- 126.740
- 117.279
- 77.414
- 76.989
- 76.564
- 72.984
- 68.079
- 54.356
- 51.166
- 38.639
- 33.992

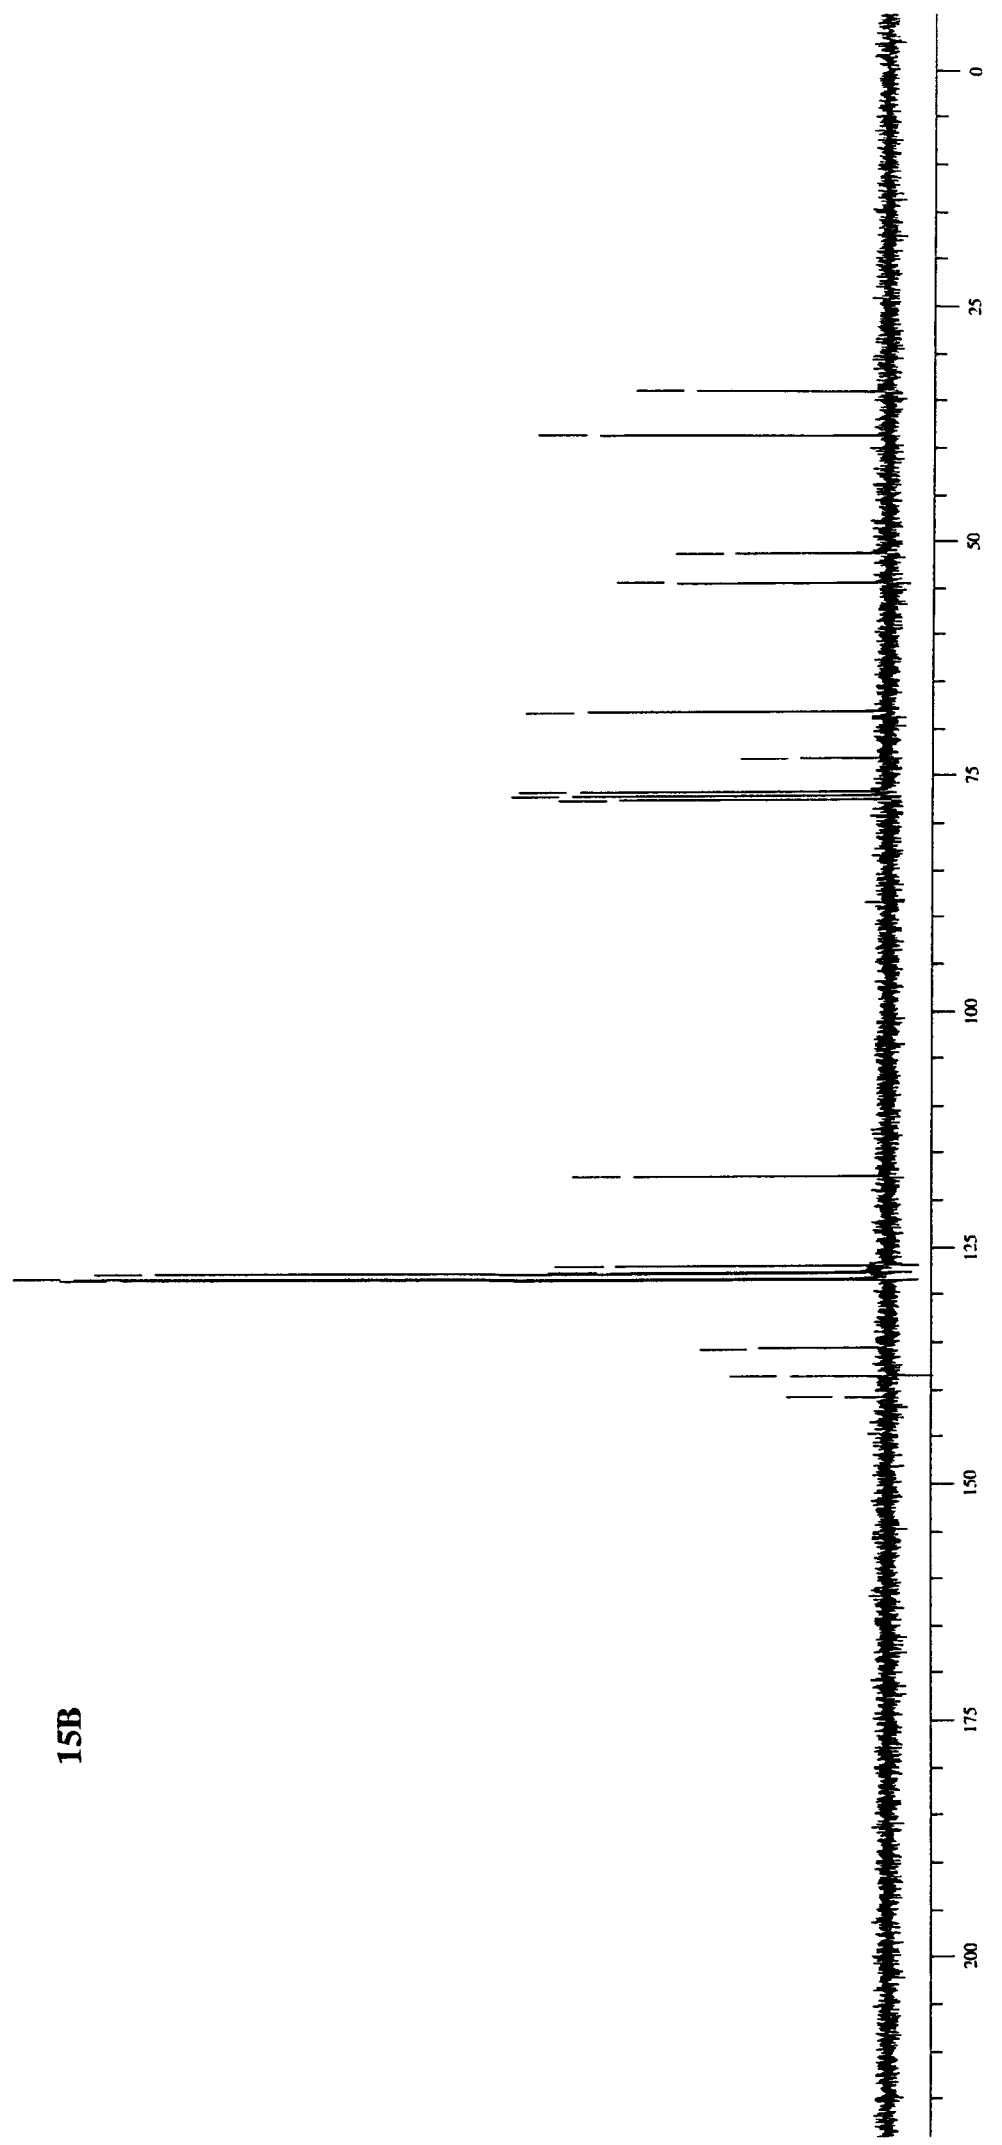

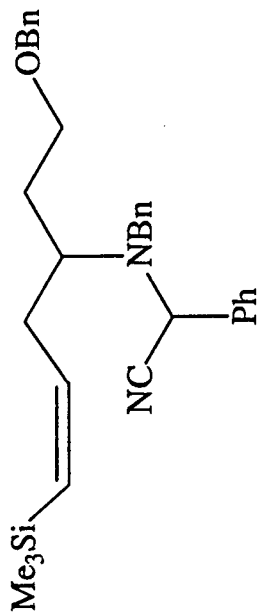

**16** (1:1 dr)

|         |       |
|---------|-------|
| 146.390 | 0.220 |
| 145.317 | 0.041 |
| 138.356 |       |
| 137.961 |       |
| 137.823 |       |
| 134.276 |       |
| 134.193 |       |
| 131.319 |       |
| 129.807 |       |
| 129.064 |       |
| 128.965 |       |
| 128.596 |       |
| 128.569 |       |
| 128.432 |       |
| 128.363 |       |
| 128.267 |       |
| 128.196 |       |
| 128.033 |       |
| 127.552 |       |
| 127.442 |       |
| 127.387 |       |
| 127.359 |       |
| 118.146 |       |
| 117.967 |       |
| 77.417  |       |
| 76.988  |       |
| 76.572  |       |
| 72.727  |       |
| 67.950  |       |
| 67.626  |       |
| 54.988  |       |
| 54.519  |       |
| 54.302  |       |
| 53.872  |       |
| 50.932  |       |
| 50.612  |       |
| 35.669  |       |
| 32.946  |       |
| 31.792  |       |
| 29.435  |       |

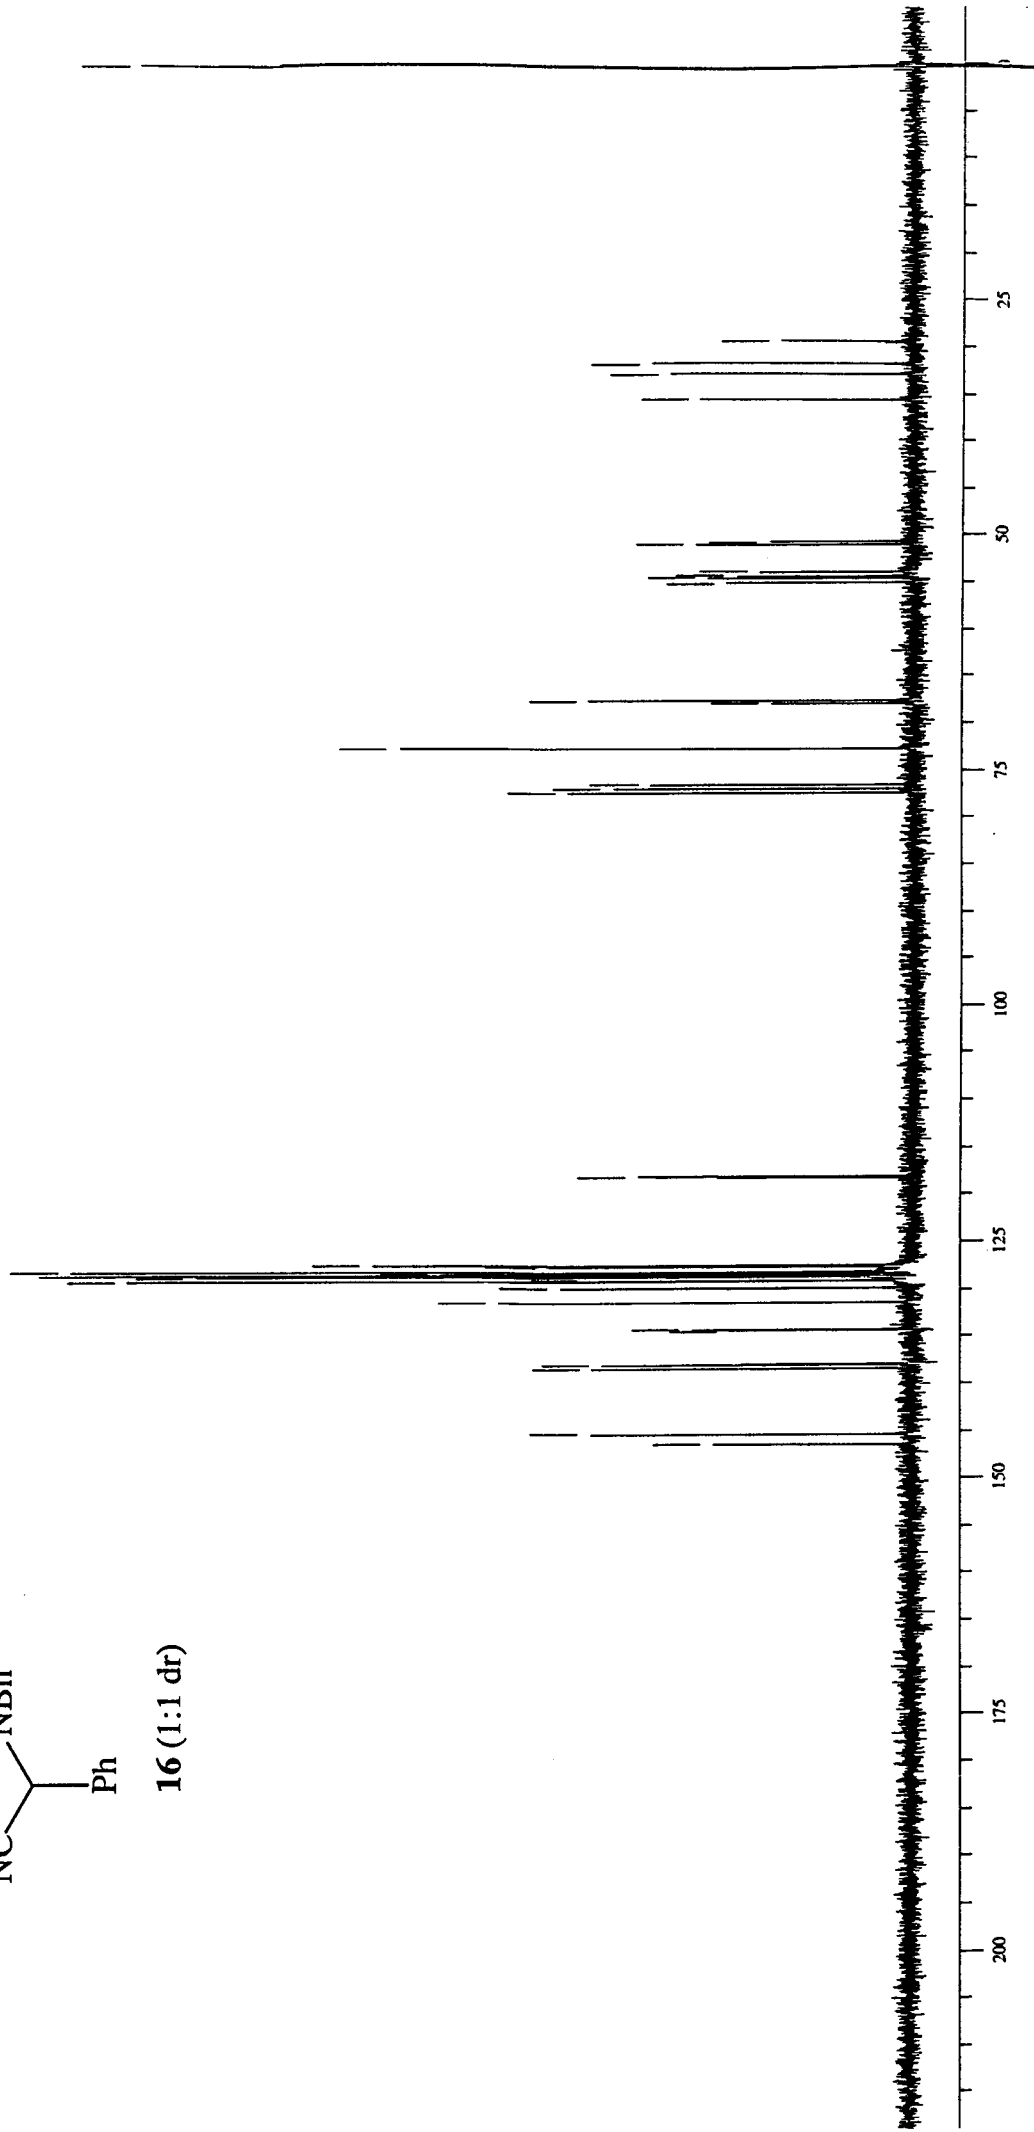



**Experimental and quantum-mechanical investigation  
of the vinylsilane-iminium ion cyclization**

Lisbet Kværnø, Per-Ola Norrby and David Tanner\*

**Electronic Supplementary Information:** Selected bond lengths in geometry optimized structures of  $\alpha$ -substituted (*Z*)-vinylsilanes. Cartesian coordinates, raw energies and lower frequencies of computationally characterized species **17A-32H**.

**Table.  $\alpha$ -Substituted (*Z*)-Vinylsilanes. Selected Bond Lengths in Geometry Optimized Structures, in Å**

|                 | R=H                |                    |       |       | R=Me  |       |       |       |
|-----------------|--------------------|--------------------|-------|-------|-------|-------|-------|-------|
|                 | A                  | B                  | C     | D     | E     | F     | G     | H     |
| <b>27</b> C2-C3 | 4.617              | 4.619              | 4.504 | 4.505 | 3.659 | 3.603 | 4.259 | 4.693 |
| <b>28</b> C2-C3 | 1.796              | 1.827              | 1.922 | 1.947 | 1.856 | 1.867 | 1.915 | 1.942 |
| <b>29</b> C2-C3 | 1.504 <sup>a</sup> | 1.507 <sup>a</sup> | 1.554 | 1.554 | 1.599 | 1.592 | 1.577 | 1.563 |
| <b>30</b> C2-C3 | 1.671              | 1.668              | 1.646 | 1.601 | 1.652 | 1.647 | 1.608 | 1.586 |
| <b>27</b> C5-C6 | 1.559              | 1.550              | 1.553 | 1.553 | 1.550 | 1.554 | 1.547 | 1.554 |
| <b>28</b> C5-C6 | 1.663              | 1.652              | 1.637 | 1.631 | 1.663 | 1.646 | 1.648 | 1.630 |
| <b>29</b> C5-C6 | 1.552 <sup>a</sup> | 1.558 <sup>a</sup> | 1.654 | 1.573 | 1.609 | 1.600 | 1.608 | 1.598 |
| <b>30</b> C5-C6 | 1.930              | 1.969              | 1.961 | 2.034 | 1.912 | 1.964 | 1.935 | 1.985 |
| <b>27</b> C3-Si | 1.912              | 1.912              | 1.913 | 1.913 | 1.902 | 1.909 | 1.902 | 1.902 |
| <b>28</b> C3-Si | 1.981              | 1.981              | 1.960 | 1.961 | 1.980 | 1.985 | 1.965 | 1.964 |
| <b>29</b> C3-Si | 2.625 <sup>a</sup> | 2.582 <sup>a</sup> | 2.164 | 2.151 | 2.102 | 2.113 | 2.085 | 2.105 |
| <b>30</b> C3-Si | 1.972              | 1.973              | 1.970 | 1.992 | 1.989 | 1.991 | 1.993 | 2.000 |

<sup>a</sup> The trimethylsilyl group had partly migrated to give a  $\pi$ -silyl complex in the geometry optimization.

Cartesian coordinates, raw energies and lower frequencies of computationally characterized species  
**17A-32H.**

17A

Filename: reac\_minTMS\_f.out

B3LYP/6-31g\*: -659.69612375 Hartree

ZPE: 650.788 kJ/mol

DeltaG (excl. ZPE): -108.193 kJ/mol

Low frequencies: 28.72 58.29 88.50

Cartesian coordinates:

|    |          |          |          |
|----|----------|----------|----------|
| C  | -1.02529 | 0.17881  | 0.26663  |
| H  | -2.02686 | -0.13780 | -0.03424 |
| H  | -1.10326 | 0.82877  | 1.14592  |
| C  | -0.23827 | 0.88003  | -0.85964 |
| H  | -0.80185 | 1.78466  | -1.11902 |
| H  | -0.22007 | 0.24164  | -1.74805 |
| C  | 1.15487  | 1.23128  | -0.39209 |
| C  | 2.30226  | 0.66142  | -0.80815 |
| H  | 3.20035  | 1.05474  | -0.32330 |
| H  | 1.18690  | 2.00962  | 0.37507  |
| N  | -0.26816 | -1.02143 | 0.69523  |
| C  | -0.73220 | -2.15599 | 1.05090  |
| H  | -1.80730 | -2.31622 | 1.08556  |
| H  | -0.04847 | -2.95743 | 1.31780  |
| H  | 0.75313  | -0.87755 | 0.64662  |
| Si | 2.65966  | -0.60675 | -2.19767 |
| C  | 4.51354  | -0.92590 | -2.15157 |
| H  | 5.08330  | -0.00603 | -2.32746 |
| H  | 4.83395  | -1.33543 | -1.18601 |
| H  | 4.80495  | -1.64455 | -2.92628 |
| C  | 1.73989  | -2.23993 | -1.86657 |
| H  | 1.99797  | -2.67028 | -0.88938 |
| H  | 0.64911  | -2.14700 | -1.93754 |
| H  | 2.03951  | -2.97883 | -2.61959 |
| C  | 2.12107  | 0.10116  | -3.86126 |
| H  | 2.37267  | -0.59497 | -4.67048 |
| H  | 1.04238  | 0.28955  | -3.91434 |
| H  | 2.63211  | 1.04778  | -4.06992 |

17B

Filename: reac\_minTMS\_eqMe.out

B3LYP/6-31g\*: -699.03193535 Hartree

ZPE: 724.234 kJ/mol

DeltaG (excl. ZPE): -114.516 kJ/mol

Low frequencies: 23.35 48.02 72.61

Cartesian coordinates:

|    |          |          |          |
|----|----------|----------|----------|
| C  | 0.15263  | -0.11390 | 0.54974  |
| H  | 0.01899  | 0.78238  | 1.16628  |
| H  | 1.21075  | -0.21404 | 0.29553  |
| C  | -0.75902 | -0.05945 | -0.69025 |
| H  | -0.57463 | -0.93366 | -1.32191 |
| H  | -0.45515 | 0.82580  | -1.26347 |
| C  | -2.21149 | 0.04208  | -0.28740 |
| C  | -3.16493 | -0.88494 | -0.49503 |
| H  | -4.15195 | -0.61073 | -0.11155 |
| H  | -2.46660 | 0.96943  | 0.23327  |
| N  | -0.23215 | -1.27423 | 1.38868  |
| C  | 0.54791  | -2.05466 | 2.04762  |
| H  | 1.61438  | -1.83378 | 1.99451  |
| Si | -3.12783 | -2.53875 | -1.45307 |

|   |          |          |          |
|---|----------|----------|----------|
| C | -4.87219 | -3.24103 | -1.36071 |
| H | -5.19031 | -3.40913 | -0.32469 |
| H | -5.60046 | -2.56637 | -1.82584 |
| H | -4.93538 | -4.20207 | -1.88428 |
| C | -2.60671 | -2.24877 | -3.24363 |
| H | -3.27521 | -1.53406 | -3.73687 |
| H | -1.58483 | -1.86271 | -3.33543 |
| H | -2.65357 | -3.18768 | -3.80862 |
| C | -1.92153 | -3.75100 | -0.61977 |
| H | -1.96490 | -4.72130 | -1.12911 |
| H | -0.87721 | -3.41732 | -0.66571 |
| H | -2.18800 | -3.93355 | 0.42973  |
| H | -1.24578 | -1.45155 | 1.39073  |
| C | 0.08560  | -3.20453 | 2.85620  |
| H | 0.43132  | -3.07774 | 3.89077  |
| H | -0.99989 | -3.32606 | 2.84285  |
| H | 0.56189  | -4.12094 | 2.48295  |

17C

Filename: reac\_minTMS\_axMe.out

B3LYP/6-31g\*: -699.03020820 Hartree

ZPE: 724.786 kJ/mol

DeltaG (excl. ZPE): -114.840 kJ/mol

Low frequencies: 27.18 37.47 72.57

Cartesian coordinates:

|    |          |          |          |
|----|----------|----------|----------|
| C  | 1.02125  | -1.02162 | 1.48397  |
| H  | 0.99783  | -1.08709 | 2.57300  |
| H  | 1.43799  | -0.05008 | 1.19488  |
| C  | -0.37550 | -1.22895 | 0.86180  |
| H  | -1.00250 | -0.39969 | 1.21145  |
| H  | -0.81370 | -2.15331 | 1.25040  |
| C  | -0.29998 | -1.24267 | -0.64613 |
| C  | -0.47675 | -2.31508 | -1.44189 |
| H  | -0.35657 | -2.10806 | -2.50923 |
| H  | -0.04678 | -0.27725 | -1.09247 |
| N  | 1.93134  | -2.06629 | 0.95573  |
| C  | 2.98051  | -2.58909 | 1.48739  |
| Si | -1.04371 | -4.10150 | -1.05579 |
| C  | -0.95374 | -5.04606 | -2.68173 |
| H  | -1.60139 | -4.59748 | -3.44398 |
| H  | 0.06598  | -5.06992 | -3.08474 |
| H  | -1.27782 | -6.08463 | -2.54691 |
| C  | 0.12121  | -4.93020 | 0.20082  |
| H  | -0.18890 | -5.97261 | 0.34306  |
| H  | 1.15984  | -4.96141 | -0.15566 |
| H  | 0.10297  | -4.45996 | 1.19160  |
| C  | -2.80116 | -4.07006 | -0.37066 |
| H  | -3.16290 | -5.09037 | -0.19510 |
| H  | -2.87257 | -3.52740 | 0.57927  |
| H  | -3.49011 | -3.59200 | -1.07604 |
| H  | 1.63362  | -2.39811 | 0.02745  |
| C  | 3.57089  | -2.23204 | 2.79630  |
| H  | 3.58145  | -3.12603 | 3.43516  |
| H  | 4.62395  | -1.96011 | 2.64261  |
| H  | 3.05894  | -1.41881 | 3.31049  |
| H  | 3.46491  | -3.36804 | 0.89925  |

17D

Filename: reac\_minTMS\_MeMe.out

B3LYP/6-31g\*: -738.36101972 Hartree

ZPE: 797.496 kJ/mol

DeltaG (excl. ZPE): -120.518 kJ/mol

Low frequencies: 24.80 38.82 57.71

Cartesian coordinates:

|    |          |          |          |
|----|----------|----------|----------|
| C  | 2.33206  | -1.85616 | 1.97877  |
| H  | 2.19252  | -1.50049 | 3.00209  |
| H  | 3.20525  | -1.34999 | 1.54948  |
| C  | 1.07827  | -1.61535 | 1.11497  |
| H  | 0.94290  | -0.52841 | 1.05109  |
| H  | 0.20015  | -2.02054 | 1.62695  |
| C  | 1.23722  | -2.21368 | -0.26194 |
| C  | 0.53675  | -3.24709 | -0.76566 |
| H  | 0.82089  | -3.53324 | -1.78245 |
| H  | 2.02010  | -1.74777 | -0.86696 |
| N  | 2.62644  | -3.30620 | 2.01312  |
| C  | 3.30021  | -3.96873 | 2.89909  |
| Si | -0.95735 | -4.21338 | -0.06654 |
| C  | -1.37757 | -5.53285 | -1.34280 |
| H  | -1.64239 | -5.08702 | -2.30869 |
| H  | -0.53868 | -6.21862 | -1.51295 |
| H  | -2.23289 | -6.13512 | -1.01486 |
| C  | -0.49918 | -5.06312 | 1.57262  |
| H  | -1.35366 | -5.65129 | 1.92902  |
| H  | 0.33534  | -5.76613 | 1.44932  |
| H  | -0.24636 | -4.35778 | 2.37391  |
| C  | -2.41100 | -3.04131 | 0.20525  |
| H  | -3.29006 | -3.59711 | 0.55345  |
| H  | -2.19686 | -2.26559 | 0.94966  |
| H  | -2.68793 | -2.53612 | -0.72702 |
| H  | 2.24362  | -3.80912 | 1.20362  |
| C  | 3.89469  | -3.27442 | 4.08417  |
| H  | 3.09624  | -2.93892 | 4.75987  |
| H  | 4.54958  | -3.94714 | 4.63989  |
| H  | 4.46227  | -2.38734 | 3.78274  |
| C  | 3.47780  | -5.44106 | 2.74202  |
| H  | 4.54922  | -5.67142 | 2.68504  |
| H  | 3.09748  | -5.94828 | 3.63781  |
| H  | 2.97290  | -5.84154 | 1.86006  |

17E

Filename: reac\_minMeTMS\_f.out

B3LYP/6-31g\*: -699.01291359 Hartree

ZPE: 724.836 kJ/mol

DeltaG (excl. ZPE): -106.838 kJ/mol

Low frequencies: -12.66 56.33 84.01

Cartesian coordinates:

|    |          |          |          |
|----|----------|----------|----------|
| C  | -1.57029 | 0.64648  | 0.54233  |
| H  | -2.60254 | 0.65085  | 0.18772  |
| H  | -1.53879 | 1.10796  | 1.53289  |
| C  | -0.62674 | 1.38664  | -0.44145 |
| H  | -1.08594 | 2.37299  | -0.59509 |
| H  | -0.62839 | 0.88188  | -1.41198 |
| C  | 0.76947  | 1.53567  | 0.09999  |
| C  | 1.90577  | 1.06517  | -0.45272 |
| H  | 2.81345  | 1.31288  | 0.10532  |
| H  | 0.82586  | 2.11662  | 1.02636  |
| N  | -1.15785 | -0.77532 | 0.70704  |
| C  | -0.17046 | -1.08474 | 1.46810  |
| H  | 0.30419  | -0.31975 | 2.07191  |
| H  | 0.17869  | -2.11144 | 1.51487  |
| C  | -1.84478 | -1.80071 | -0.11246 |
| H  | -1.42342 | -2.78333 | 0.09588  |
| H  | -2.90931 | -1.78555 | 0.13795  |
| H  | -1.72675 | -1.54408 | -1.16891 |
| Si | 2.21727  | 0.15907  | -2.10909 |

|   |         |          |          |
|---|---------|----------|----------|
| C | 4.08609 | 0.06774  | -2.31028 |
| H | 4.53028 | 1.06862  | -2.36357 |
| H | 4.56043 | -0.46376 | -1.47578 |
| H | 4.35741 | -0.46046 | -3.23206 |
| C | 1.50713 | -1.59319 | -1.97194 |
| H | 2.02857 | -2.17390 | -1.20052 |
| H | 0.44195 | -1.57652 | -1.70721 |
| H | 1.62231 | -2.13397 | -2.91842 |
| C | 1.44784 | 1.10604  | -3.55006 |
| H | 1.72842 | 0.63418  | -4.49994 |
| H | 0.35266 | 1.13828  | -3.51405 |
| H | 1.80938 | 2.13922  | -3.57725 |

17F

Filename: reac\_minMeTMS\_eqMe.out

B3LYP/6-31g\*: -738.34332927 Hartree

ZPE: 798.198 kJ/mol

DeltaG (excl. ZPE): -121.212 kJ/mol

Low frequencies: 15.29 44.77 66.28

Cartesian coordinates:

|    |          |          |          |
|----|----------|----------|----------|
| C  | 0.18485  | 0.21281  | 0.73703  |
| H  | -0.12206 | 1.08766  | 1.31640  |
| H  | 1.22542  | 0.35174  | 0.43622  |
| C  | -0.73854 | 0.00921  | -0.48434 |
| H  | -0.46654 | -0.91104 | -1.01161 |
| H  | -0.51503 | 0.84135  | -1.16660 |
| C  | -2.19844 | 0.02732  | -0.11228 |
| C  | -3.10417 | -0.94209 | -0.33423 |
| H  | -4.11641 | -0.69827 | 0.00158  |
| H  | -2.51978 | 0.95925  | 0.36401  |
| N  | 0.15315  | -0.96976 | 1.64715  |
| C  | -0.79799 | -1.08675 | 2.51493  |
| H  | -1.49096 | -0.24965 | 2.55183  |
| Si | -2.96473 | -2.62118 | -1.23180 |
| C  | -4.70566 | -3.33858 | -1.28010 |
| H  | -5.11576 | -3.48427 | -0.27346 |
| H  | -5.39382 | -2.68343 | -1.82707 |
| H  | -4.71350 | -4.31316 | -1.78208 |
| C  | -2.29269 | -2.38481 | -2.98106 |
| H  | -2.92142 | -1.69407 | -3.55433 |
| H  | -1.26916 | -1.99238 | -3.00025 |
| H  | -2.28464 | -3.34267 | -3.51544 |
| C  | -1.82779 | -3.79308 | -0.25981 |
| H  | -1.82531 | -4.78438 | -0.72897 |
| H  | -0.78626 | -3.44937 | -0.23825 |
| H  | -2.17017 | -3.92766 | 0.77373  |
| C  | 1.21539  | -1.96863 | 1.41324  |
| H  | 0.96726  | -2.92382 | 1.86843  |
| H  | 1.32724  | -2.10192 | 0.33567  |
| H  | 2.15190  | -1.58527 | 1.82852  |
| C  | -1.04047 | -2.19887 | 3.46470  |
| H  | -1.03965 | -1.78997 | 4.48410  |
| H  | -2.05336 | -2.58534 | 3.29240  |
| H  | -0.32804 | -3.02059 | 3.41018  |

17G

Filename: reac\_minMeTMS\_axMe.out

B3LYP/6-31g\*: -738.34249371 Hartree

ZPE: 799.558 kJ/mol

DeltaG (excl. ZPE): -119.759 kJ/mol

Low frequencies: 12.74 42.55 53.41

Cartesian coordinates:

|    |          |          |          |
|----|----------|----------|----------|
| C  | -0.21941 | 0.33064  | 1.02889  |
| H  | -0.85687 | 1.13298  | 1.40916  |
| H  | 0.81402  | 0.58888  | 1.26264  |
| C  | -0.41829 | 0.14526  | -0.49137 |
| H  | 0.16548  | -0.71151 | -0.83777 |
| H  | 0.03028  | 1.04058  | -0.94626 |
| C  | -1.86064 | 0.04318  | -0.92141 |
| C  | -2.43755 | -0.95151 | -1.61712 |
| H  | -3.49316 | -0.77459 | -1.84828 |
| H  | -2.46017 | 0.91754  | -0.65019 |
| N  | -0.57783 | -0.88825 | 1.81545  |
| C  | 0.24895  | -1.84608 | 2.07372  |
| Si | -1.81352 | -2.58106 | -2.37515 |
| C  | -3.23158 | -3.81378 | -2.19716 |
| H  | -3.47129 | -4.01813 | -1.14652 |
| H  | -4.14539 | -3.44712 | -2.67927 |
| H  | -2.97568 | -4.77043 | -2.66804 |
| C  | -1.41228 | -2.27452 | -4.19237 |
| H  | -2.28051 | -1.87828 | -4.73114 |
| H  | -0.59176 | -1.55802 | -4.31341 |
| H  | -1.11620 | -3.20855 | -4.68519 |
| C  | -0.28667 | -3.29305 | -1.49325 |
| H  | -0.09047 | -4.30066 | -1.87978 |
| H  | 0.62451  | -2.70669 | -1.66087 |
| H  | -0.44951 | -3.39330 | -0.41199 |
| C  | -1.98639 | -0.95946 | 2.26619  |
| H  | -2.16275 | -1.90244 | 2.78481  |
| H  | -2.18097 | -0.11939 | 2.93770  |
| H  | -2.62637 | -0.88661 | 1.38384  |
| C  | 1.67490  | -1.93988 | 1.67958  |
| H  | 1.79929  | -2.83864 | 1.06024  |
| H  | 2.05742  | -1.07947 | 1.13239  |
| H  | 2.27970  | -2.10268 | 2.58127  |
| H  | -0.15987 | -2.67695 | 2.64706  |

17H

Filename: reac\_minMeTMS\_MeMe.out

B3LYP/6-31g\*: -777.66608881 Hartree

ZPE: 872.833 kJ/mol

DeltaG (excl. ZPE): -123.587 kJ/mol

Low frequencies: 24.97 42.42 50.56

Cartesian coordinates:

|    |          |          |          |
|----|----------|----------|----------|
| C  | 0.04684  | -0.05933 | 0.59839  |
| H  | -0.16479 | 0.87130  | 1.13245  |
| H  | 1.10140  | -0.04055 | 0.32396  |
| C  | -0.85695 | -0.18450 | -0.64695 |
| H  | -0.72683 | -1.17086 | -1.10371 |
| H  | -0.46201 | 0.54948  | -1.36467 |
| C  | -2.31428 | 0.11397  | -0.38987 |
| C  | -3.36009 | -0.69306 | -0.63455 |
| H  | -4.33466 | -0.25416 | -0.40284 |
| H  | -2.49337 | 1.11900  | 0.00435  |
| N  | -0.15396 | -1.15456 | 1.59739  |
| C  | 0.52496  | -2.26547 | 1.58718  |
| Si | -3.44917 | -2.44390 | -1.37911 |
| C  | -5.25713 | -2.96729 | -1.30548 |
| H  | -5.63273 | -2.98895 | -0.27536 |
| H  | -5.89479 | -2.28196 | -1.87630 |
| H  | -5.39405 | -3.96978 | -1.72747 |
| C  | -2.82280 | -2.43657 | -3.16126 |
| H  | -3.40154 | -1.73997 | -3.77843 |
| H  | -1.76845 | -2.14484 | -3.23746 |
| H  | -2.92187 | -3.43339 | -3.60810 |

|   |          |          |          |
|---|----------|----------|----------|
| C | -2.40889 | -3.65785 | -0.34584 |
| H | -2.56758 | -4.68387 | -0.69896 |
| H | -1.33323 | -3.45498 | -0.42280 |
| H | -2.69691 | -3.62921 | 0.71274  |
| C | -1.19052 | -0.85619 | 2.61184  |
| H | -0.78416 | -0.14708 | 3.33958  |
| H | -2.03901 | -0.40942 | 2.09160  |
| H | -1.52015 | -1.76190 | 3.11420  |
| C | 0.33798  | -3.30698 | 2.65371  |
| H | 1.16216  | -4.02217 | 2.62235  |
| H | 0.28480  | -2.87652 | 3.65707  |
| H | -0.59020 | -3.86460 | 2.46900  |
| C | 1.53665  | -2.58006 | 0.52879  |
| H | 1.42526  | -3.63122 | 0.24174  |
| H | 1.47545  | -1.96418 | -0.36606 |
| H | 2.54216  | -2.48274 | 0.96231  |

18A

Filename: TS1\_TMS\_f.out

B3LYP/6-31g\*: -659.68901955 Hartree

ZPE: 652.687 kJ/mol

DeltaG (excl. ZPE): -101.357 kJ/mol

Low frequencies: -225.64 32.95 109.39

Cartesian coordinates:

|    |          |          |          |
|----|----------|----------|----------|
| C  | 0.00000  | 0.00000  | 0.00000  |
| C  | 0.00000  | 0.00000  | 1.61715  |
| N  | 1.36176  | 0.00000  | 2.06905  |
| C  | 2.14783  | -1.04804 | 1.72840  |
| C  | 2.18980  | -1.20455 | -0.27232 |
| C  | 0.80747  | -1.15731 | -0.40274 |
| H  | 0.41967  | 0.95759  | -0.31669 |
| H  | -1.04041 | -0.07047 | -0.32737 |
| H  | -0.52065 | -0.88945 | 1.97835  |
| H  | -0.52470 | 0.88828  | 1.97224  |
| H  | 1.81571  | 0.90865  | 2.07881  |
| H  | 3.20988  | -0.93484 | 1.92709  |
| H  | 1.74957  | -2.03438 | 1.94426  |
| H  | 2.59276  | -2.20886 | -0.44343 |
| H  | 0.26165  | -2.08437 | -0.59206 |
| Si | 3.49127  | 0.12398  | -0.87416 |
| C  | 5.16889  | -0.67723 | -0.58769 |
| H  | 5.38128  | -0.86899 | 0.47103  |
| H  | 5.25928  | -1.62814 | -1.12538 |
| H  | 5.96339  | -0.01880 | -0.95901 |
| C  | 3.13624  | 0.38600  | -2.70290 |
| H  | 3.16990  | -0.55571 | -3.26205 |
| H  | 2.15390  | 0.84213  | -2.87151 |
| H  | 3.88912  | 1.05387  | -3.13901 |
| C  | 3.37460  | 1.75910  | 0.06968  |
| H  | 4.08244  | 2.46034  | -0.39052 |
| H  | 2.39088  | 2.24003  | 0.01513  |
| H  | 3.67687  | 1.67850  | 1.12183  |

18B

Filename: TS1\_TMS\_eqMe\_f.out

B3LYP/6-31g\*: -699.00705902 Hartree

ZPE: 726.665 kJ/mol

DeltaG (excl. ZPE): -103.313 kJ/mol

Low frequencies: -141.93 60.33 102.69

Cartesian coordinates:

|   |         |         |         |
|---|---------|---------|---------|
| C | 0.00000 | 0.00000 | 0.00000 |
| C | 0.00000 | 0.00000 | 1.63847 |

|    |          |          |          |
|----|----------|----------|----------|
| N  | 1.33592  | 0.00000  | 2.12462  |
| C  | 2.16041  | -1.06196 | 1.75128  |
| C  | 2.19603  | -1.20236 | -0.03373 |
| C  | 0.83267  | -1.13235 | -0.38150 |
| H  | 0.42082  | 0.96878  | -0.27871 |
| H  | -1.03087 | -0.07359 | -0.35201 |
| H  | -0.53949 | -0.88503 | 1.98178  |
| H  | -0.53831 | 0.89206  | 1.96316  |
| H  | 1.78813  | 0.90931  | 2.15247  |
| H  | 1.67804  | -2.01154 | 1.99027  |
| H  | 2.61176  | -2.19523 | -0.24028 |
| H  | 0.32553  | -2.02137 | -0.76241 |
| Si | 3.40130  | 0.13075  | -0.88629 |
| C  | 5.13544  | -0.59380 | -0.81940 |
| H  | 5.56649  | -0.61407 | 0.18565  |
| H  | 5.16436  | -1.61199 | -1.22434 |
| H  | 5.79530  | 0.01953  | -1.44597 |
| C  | 2.81615  | 0.26221  | -2.67078 |
| H  | 2.81981  | -0.71209 | -3.17275 |
| H  | 1.80682  | 0.68144  | -2.75459 |
| H  | 3.48975  | 0.92005  | -3.23348 |
| C  | 3.30703  | 1.82347  | -0.05140 |
| H  | 3.94636  | 2.50508  | -0.62793 |
| H  | 2.30442  | 2.26683  | -0.06132 |
| H  | 3.68764  | 1.84126  | 0.97556  |
| C  | 3.56615  | -1.02934 | 2.32400  |
| H  | 4.17153  | -1.83815 | 1.90883  |
| H  | 4.07400  | -0.08009 | 2.13698  |
| H  | 3.50123  | -1.17653 | 3.40741  |

18C

Filename: TS1\_TMS\_axMe\_f.out

B3LYP/6-31g\*: -699.00702989 Hartree

ZPE: 726.836 kJ/mol

DeltaG (excl. ZPE): -104.944 kJ/mol

Low frequencies: -253.27 37.39 87.50

Cartesian coordinates:

|    |          |          |          |
|----|----------|----------|----------|
| C  | 0.00000  | 0.00000  | 0.00000  |
| C  | 0.00000  | 0.00000  | 1.62145  |
| N  | 1.35457  | 0.00000  | 2.07997  |
| C  | 2.18344  | -1.05535 | 1.76495  |
| C  | 2.15514  | -1.27890 | -0.13938 |
| C  | 0.78793  | -1.16947 | -0.39175 |
| H  | 0.44789  | 0.95107  | -0.29888 |
| H  | -1.03600 | -0.04281 | -0.34395 |
| H  | -0.54296 | -0.87373 | 1.98336  |
| H  | -0.51727 | 0.89871  | 1.96193  |
| H  | 1.80205  | 0.91013  | 2.03398  |
| H  | 3.22767  | -0.79722 | 1.93567  |
| H  | 2.52181  | -2.29425 | -0.32182 |
| H  | 0.22859  | -2.05732 | -0.69320 |
| Si | 3.52038  | -0.03495 | -0.80874 |
| C  | 5.14892  | -0.92539 | -0.50291 |
| H  | 5.34748  | -1.10847 | 0.55985  |
| H  | 5.18187  | -1.89059 | -1.02154 |
| H  | 5.98114  | -0.32293 | -0.88639 |
| C  | 3.16646  | 0.18391  | -2.64223 |
| H  | 3.14505  | -0.77734 | -3.16784 |
| H  | 2.20851  | 0.68631  | -2.81948 |
| H  | 3.95010  | 0.79476  | -3.10661 |
| C  | 3.48285  | 1.62748  | 0.08913  |
| H  | 4.22735  | 2.28004  | -0.38462 |
| H  | 2.52383  | 2.15335  | 0.01286  |



|   |         |          |         |
|---|---------|----------|---------|
| H | 3.77122 | 1.56056  | 1.14574 |
| C | 1.83676 | -2.43323 | 2.30316 |
| H | 2.50784 | -3.18929 | 1.88893 |
| H | 1.97563 | -2.41917 | 3.39074 |
| H | 0.80822 | -2.73171 | 2.08877 |

18D

Filename: TS1\_TMS\_MeMe\_f.out

B3LYP/6-31g\*: -738.32068892 Hartree

ZPE: 799.671 kJ/mol

DeltaG (excl. ZPE): -106.820 kJ/mol

Low frequencies: -191.62 56.36 87.01

Cartesian coordinates:

|    |          |          |          |
|----|----------|----------|----------|
| C  | 0.00000  | 0.00000  | 0.00000  |
| C  | 0.00000  | 0.00000  | 1.63135  |
| N  | 1.33320  | 0.00000  | 2.12835  |
| C  | 2.21637  | -1.03401 | 1.75433  |
| C  | 2.23806  | -1.13119 | -0.02151 |
| C  | 0.88584  | -1.08152 | -0.41613 |
| H  | 0.38094  | 0.98861  | -0.26963 |
| H  | -1.02276 | -0.10972 | -0.36606 |
| H  | -0.55627 | -0.87371 | 1.97231  |
| H  | -0.52839 | 0.89765  | 1.95704  |
| H  | 1.76365  | 0.91894  | 2.16543  |
| H  | 2.68928  | -2.09532 | -0.28063 |
| H  | 0.43310  | -1.94312 | -0.91055 |
| Si | 3.38287  | 0.24850  | -0.90401 |
| C  | 5.15627  | -0.37155 | -0.80924 |
| H  | 5.59760  | -0.30228 | 0.18866  |
| H  | 5.24140  | -1.40959 | -1.15082 |
| H  | 5.77091  | 0.23894  | -1.48303 |
| C  | 2.81172  | 0.28269  | -2.69769 |
| H  | 2.87472  | -0.70723 | -3.16411 |
| H  | 1.78208  | 0.64266  | -2.80676 |
| H  | 3.45508  | 0.95555  | -3.27776 |
| C  | 3.17733  | 1.96129  | -0.13378 |
| H  | 3.78420  | 2.65468  | -0.73136 |
| H  | 2.15149  | 2.34514  | -0.17300 |
| H  | 3.54075  | 2.04286  | 0.89584  |
| C  | 3.62439  | -0.79109 | 2.28906  |
| H  | 4.32341  | -1.52645 | 1.88477  |
| H  | 3.99882  | 0.20909  | 2.05885  |
| H  | 3.60916  | -0.90441 | 3.37849  |
| C  | 1.72647  | -2.42877 | 2.18322  |
| H  | 2.41120  | -3.20199 | 1.82514  |
| H  | 1.70565  | -2.47293 | 3.27729  |
| H  | 0.72786  | -2.66605 | 1.80785  |

18E

Filename: TS1\_MeTMS\_f.out

B3LYP/6-31g\*: -698.99937570 Hartree

ZPE: 726.137 kJ/mol

DeltaG (excl. ZPE): -105.506 kJ/mol

Low frequencies: -263.78 35.48 110.41

Cartesian coordinates:

|   |         |          |          |
|---|---------|----------|----------|
| C | 0.00000 | 0.00000  | 0.00000  |
| C | 0.00000 | 0.00000  | 1.62682  |
| N | 1.36190 | 0.00000  | 2.07194  |
| C | 2.09226 | -1.10129 | 1.74166  |
| C | 2.08829 | -1.37885 | -0.18207 |
| C | 0.71674 | -1.21630 | -0.38167 |
| H | 0.49674 | 0.92367  | -0.30555 |

|    |          |          |          |
|----|----------|----------|----------|
| H  | -1.04160 | 0.01034  | -0.32931 |
| H  | -0.53135 | -0.88470 | 1.98330  |
| H  | -0.52398 | 0.89364  | 1.96950  |
| H  | 3.15375  | -1.04316 | 1.96226  |
| H  | 1.63996  | -2.05320 | 2.00549  |
| H  | 2.39266  | -2.42722 | -0.28351 |
| H  | 0.10073  | -2.09623 | -0.58033 |
| C  | 2.00279  | 1.30806  | 2.25744  |
| H  | 1.51230  | 1.83051  | 3.08259  |
| H  | 3.05436  | 1.16840  | 2.50971  |
| H  | 1.92584  | 1.92457  | 1.35379  |
| Si | 3.49519  | -0.30596 | -1.03685 |
| C  | 5.00004  | -0.23003 | 0.09445  |
| H  | 4.86868  | 0.43090  | 0.95877  |
| H  | 5.29831  | -1.22020 | 0.45926  |
| H  | 5.84949  | 0.16551  | -0.47627 |
| C  | 3.87184  | -1.32035 | -2.57753 |
| H  | 4.21419  | -2.33288 | -2.33564 |
| H  | 2.99790  | -1.40618 | -3.23328 |
| H  | 4.66894  | -0.83448 | -3.15373 |
| C  | 2.91469  | 1.41721  | -1.53507 |
| H  | 3.71133  | 1.87640  | -2.13472 |
| H  | 2.02115  | 1.38916  | -2.16881 |
| H  | 2.72602  | 2.09596  | -0.69720 |

18F

Filename: TS1\_MeTMS\_eqMe5\_f.out

B3LYP/6-31g\*: -738.31286136 Hartree

ZPE: 800.734 kJ/mol

DeltaG (excl. ZPE): -108.798 kJ/mol

Low frequencies: -250.05 38.83 91.45

Cartesian coordinates:

|    |          |          |          |
|----|----------|----------|----------|
| C  | 0.00000  | 0.00000  | 0.00000  |
| C  | 0.00000  | 0.00000  | 1.63789  |
| N  | 1.34943  | 0.00000  | 2.09396  |
| C  | 2.08234  | -1.14248 | 1.78373  |
| C  | 2.00271  | -1.49964 | -0.03135 |
| C  | 0.65299  | -1.25486 | -0.33621 |
| H  | 0.55778  | 0.89555  | -0.28593 |
| H  | -1.03258 | 0.06995  | -0.34741 |
| H  | -0.54447 | -0.87842 | 1.98994  |
| H  | -0.52727 | 0.89850  | 1.96204  |
| H  | 1.53231  | -2.03198 | 2.09300  |
| H  | 2.23045  | -2.57049 | -0.10625 |
| H  | 0.00042  | -2.08974 | -0.60009 |
| C  | 1.96952  | 1.31704  | 2.27425  |
| H  | 1.34040  | 1.90681  | 2.94440  |
| H  | 2.94978  | 1.21302  | 2.73693  |
| H  | 2.07901  | 1.85737  | 1.32578  |
| Si | 3.38322  | -0.63871 | -1.17110 |
| C  | 4.99702  | -1.56436 | -0.88353 |
| H  | 5.48905  | -1.31557 | 0.06099  |
| H  | 4.86262  | -2.65136 | -0.92400 |
| H  | 5.69120  | -1.29800 | -1.69086 |
| C  | 2.76154  | -0.96202 | -2.91975 |
| H  | 2.59044  | -2.02855 | -3.10511 |
| H  | 1.82675  | -0.42903 | -3.12957 |
| H  | 3.50598  | -0.62028 | -3.64916 |
| C  | 3.59681  | 1.21447  | -0.90087 |
| H  | 4.30205  | 1.57373  | -1.66198 |
| H  | 2.67157  | 1.78469  | -1.04042 |
| H  | 4.02360  | 1.47171  | 0.07325  |
| C  | 3.52198  | -1.21598 | 2.24978  |

|   |         |          |         |
|---|---------|----------|---------|
| H | 3.95652 | -2.17374 | 1.95533 |
| H | 4.14754 | -0.41804 | 1.84639 |
| H | 3.54700 | -1.16058 | 3.34452 |

18G

Filename: TS1\_MeTMS\_axMe\_f.out

B3LYP/6-31g\*: -738.31521112 Hartree

ZPE: 799.889 kJ/mol

DeltaG (excl. ZPE): -110.355 kJ/mol

Low frequencies: -273.52 23.95 96.80

Cartesian coordinates:

|    |          |          |          |
|----|----------|----------|----------|
| C  | 0.00000  | 0.00000  | 0.00000  |
| C  | 0.00000  | 0.00000  | 1.62818  |
| N  | 1.35927  | 0.00000  | 2.07135  |
| C  | 2.13016  | -1.10415 | 1.76576  |
| C  | 2.07121  | -1.41032 | -0.11461 |
| C  | 0.71203  | -1.21678 | -0.38027 |
| H  | 0.50798  | 0.92225  | -0.29335 |
| H  | -1.03733 | 0.02082  | -0.34108 |
| H  | -0.54964 | -0.87080 | 1.98545  |
| H  | -0.51533 | 0.90170  | 1.96303  |
| H  | 3.18593  | -0.90395 | 1.93300  |
| H  | 2.35000  | -2.46303 | -0.23411 |
| H  | 0.09540  | -2.07415 | -0.65728 |
| C  | 1.98187  | 1.32039  | 2.22343  |
| H  | 1.52339  | 1.83663  | 3.07143  |
| H  | 3.04780  | 1.20556  | 2.42431  |
| H  | 1.84883  | 1.93733  | 1.32584  |
| Si | 3.51180  | -0.41255 | -1.01515 |
| C  | 5.05730  | -0.47095 | 0.06124  |
| H  | 5.01590  | 0.19641  | 0.92962  |
| H  | 5.27841  | -1.48444 | 0.41676  |
| H  | 5.91722  | -0.15125 | -0.54050 |
| C  | 3.75833  | -1.42345 | -2.58425 |
| H  | 4.03294  | -2.46254 | -2.36958 |
| H  | 2.85745  | -1.43403 | -3.20839 |
| H  | 4.56854  | -0.98846 | -3.18230 |
| C  | 3.03418  | 1.35605  | -1.45425 |
| H  | 3.83477  | 1.77207  | -2.07954 |
| H  | 2.11389  | 1.40694  | -2.04683 |
| H  | 2.93229  | 2.02220  | -0.59214 |
| C  | 1.71569  | -2.45369 | 2.33998  |
| H  | 2.37111  | -3.24545 | 1.96948  |
| H  | 1.82498  | -2.41014 | 3.42993  |
| H  | 0.68475  | -2.72672 | 2.10468  |

18H

Filename: TS1\_MeTMS\_MeMe\_f.out

B3LYP/6-31g\*: -777.62381123 Hartree

ZPE: 874.414 kJ/mol

DeltaG (excl. ZPE): -111.177 kJ/mol

Low frequencies: -252.83 44.94 89.74

Cartesian coordinates:

|   |          |          |          |
|---|----------|----------|----------|
| C | 0.00000  | 0.00000  | 0.00000  |
| C | 0.00000  | 0.00000  | 1.63870  |
| N | 1.34795  | 0.00000  | 2.09952  |
| C | 2.13209  | -1.13191 | 1.79718  |
| C | 2.02520  | -1.46633 | -0.01829 |
| C | 0.67539  | -1.23917 | -0.34204 |
| H | 0.54658  | 0.90516  | -0.27796 |
| H | -1.03183 | 0.05613  | -0.35196 |
| H | -0.56495 | -0.86337 | 1.98704  |

|    |          |          |          |
|----|----------|----------|----------|
| H  | -0.51896 | 0.90524  | 1.95576  |
| H  | 2.26721  | -2.53085 | -0.12064 |
| H  | 0.04515  | -2.07560 | -0.65082 |
| C  | 1.94867  | 1.32988  | 2.26976  |
| H  | 1.22120  | 1.97284  | 2.76839  |
| H  | 2.82934  | 1.26949  | 2.90817  |
| H  | 2.23137  | 1.79159  | 1.31526  |
| Si | 3.37003  | -0.60886 | -1.20732 |
| C  | 5.00799  | -1.49729 | -0.93388 |
| H  | 5.52937  | -1.19653 | -0.02093 |
| H  | 4.88988  | -2.58697 | -0.91907 |
| H  | 5.66760  | -1.25945 | -1.77829 |
| C  | 2.72107  | -1.00115 | -2.93262 |
| H  | 2.56678  | -2.07648 | -3.07893 |
| H  | 1.77275  | -0.49265 | -3.14286 |
| H  | 3.44536  | -0.67155 | -3.68747 |
| C  | 3.55155  | 1.25629  | -1.00265 |
| H  | 4.20416  | 1.61015  | -1.81170 |
| H  | 2.60608  | 1.80058  | -1.10483 |
| H  | 4.02527  | 1.55099  | -0.06123 |
| C  | 1.56849  | -2.44013 | 2.38589  |
| H  | 2.17969  | -3.29172 | 2.07762  |
| H  | 1.60972  | -2.37355 | 3.47884  |
| H  | 0.53773  | -2.64556 | 2.09162  |
| C  | 3.60374  | -0.99942 | 2.16864  |
| H  | 4.13954  | -1.90288 | 1.87164  |
| H  | 4.09449  | -0.14253 | 1.70623  |
| H  | 3.69475  | -0.90591 | 3.25767  |

19A

Filename: ts\_minTMS.out

B3LYP/6-31g\*: -659.69818599 Hartree

ZPE: 653.997 kJ/mol

DeltaG (excl. ZPE): -103.517 kJ/mol

Low frequencies: 31.86 88.12 105.58

Cartesian coordinates:

|    |          |          |          |
|----|----------|----------|----------|
| C  | -0.59475 | 0.66875  | 1.25246  |
| C  | -0.31619 | -0.86563 | 1.28773  |
| N  | 0.73122  | -1.26246 | 0.36856  |
| C  | 0.53036  | -0.89543 | -1.01172 |
| C  | -0.09467 | 0.50566  | -1.21970 |
| C  | -0.73309 | 1.12298  | -0.15898 |
| H  | 0.23967  | 1.19609  | 1.73947  |
| H  | -1.49171 | 0.95332  | 1.81618  |
| H  | -1.23852 | -1.39761 | 1.02715  |
| H  | -0.04270 | -1.17292 | 2.29988  |
| H  | 1.66025  | -1.04366 | 0.71063  |
| H  | 1.47040  | -1.01127 | -1.55780 |
| H  | -0.17951 | -1.59121 | -1.48538 |
| H  | -0.52265 | 0.70688  | -2.20755 |
| H  | -1.40605 | 1.95453  | -0.36736 |
| Si | 1.48115  | 1.99426  | -1.39834 |
| C  | 1.99252  | 1.61191  | -3.16048 |
| H  | 2.29709  | 0.57044  | -3.30322 |
| H  | 1.19985  | 1.84663  | -3.87847 |
| H  | 2.85683  | 2.24438  | -3.40477 |
| C  | 0.76573  | 3.71379  | -1.20889 |
| H  | -0.10501 | 3.87816  | -1.85346 |
| H  | 0.48666  | 3.95149  | -0.17712 |
| H  | 1.53104  | 4.43927  | -1.51493 |
| C  | 2.78210  | 1.56423  | -0.12362 |
| H  | 3.61397  | 2.26912  | -0.26014 |
| H  | 2.44227  | 1.67518  | 0.91086  |

H 3.19495 0.55938 -0.25858

19B

Filename: ts\_minTMS\_eqMe.out

B3LYP/6-31g\*: -699.01394682 Hartree

ZPE: 727.602 kJ/mol

DeltaG (excl. ZPE): -108.371 kJ/mol

Low frequencies: 26.91 73.61 94.35

Cartesian coordinates:

|    |          |          |          |
|----|----------|----------|----------|
| C  | -0.44438 | 0.92158  | 0.76793  |
| C  | -0.51214 | -0.56804 | 1.18088  |
| N  | 0.54145  | -1.37873 | 0.58310  |
| C  | 0.58306  | -1.35365 | -0.86145 |
| C  | 0.13484  | -0.06574 | -1.48159 |
| C  | -0.29833 | 1.02612  | -0.75276 |
| H  | 0.38892  | 1.40034  | 1.29564  |
| H  | -1.34895 | 1.45912  | 1.07381  |
| H  | -1.47883 | -0.98379 | 0.86857  |
| H  | -0.45672 | -0.66593 | 2.26812  |
| H  | 1.45372  | -1.20653 | 0.99692  |
| H  | -0.22806 | -2.01975 | -1.23720 |
| H  | 0.02890  | -0.05909 | -2.56691 |
| H  | -0.96920 | 1.71319  | -1.27763 |
| Si | 1.42072  | 2.28005  | -1.28291 |
| C  | 1.52251  | 2.33968  | -3.15060 |
| H  | 1.95033  | 1.43036  | -3.58475 |
| H  | 0.54817  | 2.52557  | -3.61670 |
| H  | 2.17580  | 3.17517  | -3.43463 |
| C  | 0.77090  | 3.86954  | -0.53193 |
| H  | -0.15254 | 4.21002  | -1.01160 |
| H  | 0.59834  | 3.79280  | 0.54570  |
| H  | 1.53137  | 4.64657  | -0.68943 |
| C  | 2.95877  | 1.63983  | -0.43050 |
| H  | 3.70340  | 2.44725  | -0.43739 |
| H  | 2.79064  | 1.37417  | 0.61814  |
| H  | 3.40352  | 0.78405  | -0.94598 |
| C  | 1.89164  | -1.93860 | -1.41546 |
| H  | 1.86827  | -2.00286 | -2.50726 |
| H  | 2.75455  | -1.33389 | -1.12005 |
| H  | 2.02444  | -2.94528 | -1.01115 |

19C

Filename: ts\_minTMS\_axMeOK.out

B3LYP/6-31g\*: -699.01451118 Hartree

ZPE: 728.100 kJ/mol

DeltaG (excl. ZPE): -107.625 kJ/mol

Low frequencies: 33.92 72.48 99.91

Cartesian coordinates:

|   |          |          |          |
|---|----------|----------|----------|
| C | -0.58804 | 0.70288  | 1.26948  |
| C | -0.32879 | -0.83194 | 1.31283  |
| N | 0.70272  | -1.24915 | 0.38269  |
| C | 0.50848  | -0.90035 | -1.01579 |
| C | -0.10867 | 0.51259  | -1.20636 |
| C | -0.73029 | 1.14487  | -0.14479 |
| H | 0.25751  | 1.22473  | 1.74361  |
| H | -1.47639 | 1.00470  | 1.83776  |
| H | -1.26239 | -1.35412 | 1.07776  |
| H | -0.04028 | -1.13483 | 2.32223  |
| H | 1.63342  | -1.02250 | 0.71629  |
| H | 1.49059  | -0.94946 | -1.49729 |
| H | -0.53930 | 0.72753  | -2.18994 |
| H | -1.39271 | 1.98459  | -0.35472 |

|    |          |          |          |
|----|----------|----------|----------|
| Si | 1.47904  | 1.98480  | -1.39664 |
| C  | 1.96424  | 1.60894  | -3.16788 |
| H  | 2.25222  | 0.56428  | -3.32115 |
| H  | 1.16578  | 1.85935  | -3.87410 |
| H  | 2.83373  | 2.23140  | -3.41897 |
| C  | 0.78863  | 3.71334  | -1.19065 |
| H  | -0.08522 | 3.89347  | -1.82674 |
| H  | 0.52104  | 3.94806  | -0.15516 |
| H  | 1.56112  | 4.43038  | -1.49818 |
| C  | 2.79439  | 1.53958  | -0.14164 |
| H  | 3.62915  | 2.23913  | -0.28708 |
| H  | 2.46981  | 1.64848  | 0.89793  |
| H  | 3.19720  | 0.53208  | -0.28622 |
| C  | -0.40318 | -1.91487 | -1.73890 |
| H  | -0.50566 | -1.67012 | -2.80170 |
| H  | 0.03741  | -2.91092 | -1.64929 |
| H  | -1.40482 | -1.93668 | -1.29691 |

19D

Filename: ts\_minTMS\_MeMe.out

B3LYP/6-31g\*: -738.32887922 Hartree

ZPE: 801.533 kJ/mol

DeltaG (excl. ZPE): -111.759 kJ/mol

Low frequencies: 28.52 72.60 85.16

Cartesian coordinates:

|    |          |          |          |
|----|----------|----------|----------|
| C  | -0.44580 | 0.94750  | 0.74122  |
| C  | -0.53968 | -0.54330 | 1.13583  |
| N  | 0.48398  | -1.37348 | 0.50702  |
| C  | 0.50714  | -1.34724 | -0.95183 |
| C  | 0.11488  | -0.01774 | -1.52759 |
| C  | -0.27941 | 1.07421  | -0.77583 |
| H  | 0.38899  | 1.40986  | 1.28193  |
| H  | -1.34520 | 1.49535  | 1.04457  |
| H  | -1.52478 | -0.93086 | 0.85168  |
| H  | -0.45787 | -0.65540 | 2.22031  |
| H  | 1.40558  | -1.18794 | 0.89490  |
| H  | 0.03730  | 0.03914  | -2.61362 |
| H  | -0.92365 | 1.79235  | -1.29402 |
| Si | 1.44395  | 2.32463  | -1.26230 |
| C  | 1.54721  | 2.42583  | -3.12845 |
| H  | 1.96155  | 1.52061  | -3.58385 |
| H  | 0.57588  | 2.63696  | -3.59013 |
| H  | 2.21307  | 3.25762  | -3.39333 |
| C  | 0.81070  | 3.90362  | -0.47571 |
| H  | -0.10879 | 4.26560  | -0.94715 |
| H  | 0.63660  | 3.80360  | 0.59988  |
| H  | 1.57979  | 4.67576  | -0.61384 |
| C  | 2.97780  | 1.65707  | -0.42280 |
| H  | 3.70830  | 2.47493  | -0.36341 |
| H  | 2.79514  | 1.32059  | 0.60294  |
| H  | 3.44571  | 0.84328  | -0.98363 |
| C  | 1.87333  | -1.84251 | -1.46317 |
| H  | 1.90118  | -1.87969 | -2.55621 |
| H  | 2.69159  | -1.20561 | -1.11413 |
| H  | 2.04137  | -2.85312 | -1.07915 |
| C  | -0.59733 | -2.31589 | -1.50680 |
| H  | -0.59044 | -2.35417 | -2.60027 |
| H  | -0.37063 | -3.30971 | -1.11211 |
| H  | -1.59939 | -2.03278 | -1.17365 |

19E

Filename: int\_minMeTMS\_f.out

B3LYP/6-31g\*: -699.00656126 Hartree  
 ZPE: 727.070 kJ/mol  
 DeltaG (excl. ZPE): -107.707 kJ/mol  
 Low frequencies: 32.36 91.30 95.26

Cartesian coordinates:

|    |          |          |          |
|----|----------|----------|----------|
| C  | 0.00000  | 0.00000  | 0.00000  |
| C  | 0.00000  | 0.00000  | 1.58936  |
| N  | 1.35059  | 0.00000  | 2.07952  |
| C  | 2.14474  | -1.13331 | 1.68335  |
| C  | 1.87223  | -1.65993 | 0.23159  |
| C  | 0.72032  | -1.21392 | -0.41830 |
| H  | 0.53015  | 0.91631  | -0.29801 |
| H  | -1.00228 | 0.04531  | -0.43521 |
| H  | -0.54152 | -0.88155 | 1.94651  |
| H  | -0.52879 | 0.88731  | 1.94469  |
| H  | 3.20002  | -0.90962 | 1.85197  |
| H  | 1.90826  | -2.00147 | 2.31811  |
| H  | 2.03640  | -2.73955 | 0.10994  |
| H  | 0.28994  | -1.83720 | -1.20187 |
| C  | 1.98950  | 1.30997  | 2.14808  |
| H  | 1.42006  | 1.95443  | 2.82379  |
| H  | 2.99875  | 1.20666  | 2.55466  |
| H  | 2.05717  | 1.81712  | 1.16933  |
| Si | 3.40847  | -1.15023 | -1.11309 |
| C  | 4.87190  | -2.03404 | -0.33947 |
| H  | 5.12889  | -1.65849 | 0.65602  |
| H  | 4.71217  | -3.11546 | -0.27206 |
| H  | 5.74570  | -1.87115 | -0.98427 |
| C  | 2.92016  | -1.89134 | -2.76343 |
| H  | 2.63493  | -2.94638 | -2.68029 |
| H  | 2.09869  | -1.34775 | -3.24239 |
| H  | 3.78096  | -1.84569 | -3.44228 |
| C  | 3.60673  | 0.71153  | -1.16373 |
| H  | 4.40838  | 0.94066  | -1.87870 |
| H  | 2.70905  | 1.23169  | -1.51408 |
| H  | 3.90495  | 1.13367  | -0.19977 |

19F

Filename: ts\_minMeTMS\_eqMe.out

B3LYP/6-31g\*: -738.31634764 Hartree  
 ZPE: 802.604 kJ/mol  
 DeltaG (excl. ZPE): -109.221 kJ/mol  
 Low frequencies: 46.00 89.14 100.08

Cartesian coordinates:

|    |          |          |          |
|----|----------|----------|----------|
| C  | 0.04153  | -0.13854 | -0.05311 |
| C  | -0.00986 | -0.01961 | 1.52774  |
| N  | 1.32204  | 0.08576  | 2.06212  |
| C  | 2.14192  | -1.08238 | 1.82174  |
| C  | 2.00054  | -1.66395 | 0.35016  |
| C  | 0.84042  | -1.33985 | -0.35599 |
| H  | 0.52855  | 0.77985  | -0.41117 |
| H  | -0.94744 | -0.18593 | -0.51775 |
| H  | -0.51586 | -0.89994 | 1.93717  |
| H  | -0.59759 | 0.86047  | 1.79936  |
| H  | 1.67395  | -1.90231 | 2.39010  |
| H  | 2.25000  | -2.73206 | 0.28749  |
| H  | 0.46328  | -2.04275 | -1.09827 |
| C  | 1.89423  | 1.42665  | 1.99849  |
| H  | 1.21690  | 2.11904  | 2.50600  |
| H  | 2.85101  | 1.46098  | 2.52033  |
| H  | 2.04677  | 1.79419  | 0.96876  |
| Si | 3.41092  | -1.11491 | -1.15401 |
| C  | 4.93378  | -2.09246 | -0.65463 |

|   |         |          |          |
|---|---------|----------|----------|
| H | 5.40034 | -1.73670 | 0.26662  |
| H | 4.72417 | -3.16250 | -0.55150 |
| H | 5.66755 | -1.98162 | -1.46476 |
| C | 2.74290 | -1.74809 | -2.79145 |
| H | 2.45160 | -2.80389 | -2.74769 |
| H | 1.89136 | -1.16851 | -3.16332 |
| H | 3.54134 | -1.66988 | -3.54064 |
| C | 3.66501 | 0.74143  | -1.16709 |
| H | 4.39505 | 0.96240  | -1.95793 |
| H | 2.75438 | 1.29813  | -1.41133 |
| H | 4.07329 | 1.12948  | -0.23014 |
| C | 3.57045 | -0.96523 | 2.34648  |
| H | 4.07050 | -1.93549 | 2.27727  |
| H | 4.17231 | -0.23177 | 1.80341  |
| H | 3.54838 | -0.67768 | 3.40182  |

19G

Filename: ts\_minMeTMS\_axMe.out

B3LYP/6-31g\*: -738.32238533 Hartree

ZPE: 801.148 kJ/mol

DeltaG (excl. ZPE): -111.518 kJ/mol

Low frequencies: 37.64 71.70 87.67

Cartesian coordinates:

|    |          |          |          |
|----|----------|----------|----------|
| C  | -0.01017 | 0.02832  | -0.03880 |
| C  | -0.03620 | 0.00226  | 1.54795  |
| N  | 1.30584  | -0.00212 | 2.06163  |
| C  | 2.14084  | -1.12827 | 1.67347  |
| C  | 1.84525  | -1.64856 | 0.22009  |
| C  | 0.71005  | -1.18685 | -0.44764 |
| H  | 0.53256  | 0.94399  | -0.31526 |
| H  | -1.00285 | 0.08371  | -0.49442 |
| H  | -0.58700 | -0.88245 | 1.88025  |
| H  | -0.57062 | 0.88337  | 1.91062  |
| H  | 3.17821  | -0.79156 | 1.75031  |
| H  | 1.99103  | -2.72903 | 0.08897  |
| H  | 0.29072  | -1.80369 | -1.24246 |
| C  | 1.93195  | 1.31301  | 2.15252  |
| H  | 1.33109  | 1.95494  | 2.80306  |
| H  | 2.92450  | 1.21832  | 2.60097  |
| H  | 2.03860  | 1.82168  | 1.17759  |
| Si | 3.40713  | -1.16446 | -1.10227 |
| C  | 4.83730  | -2.11250 | -0.34274 |
| H  | 5.09338  | -1.77493 | 0.66652  |
| H  | 4.64675  | -3.19066 | -0.31094 |
| H  | 5.72246  | -1.95527 | -0.97357 |
| C  | 2.91287  | -1.84986 | -2.77522 |
| H  | 2.59776  | -2.89832 | -2.72258 |
| H  | 2.11230  | -1.27105 | -3.24843 |
| H  | 3.78183  | -1.81108 | -3.44453 |
| C  | 3.66340  | 0.69080  | -1.10797 |
| H  | 4.48537  | 0.91138  | -1.80241 |
| H  | 2.78822  | 1.24463  | -1.46367 |
| H  | 3.95449  | 1.08370  | -0.12960 |
| C  | 1.97534  | -2.32737 | 2.63409  |
| H  | 2.63930  | -3.15234 | 2.35499  |
| H  | 2.22563  | -2.01055 | 3.64942  |
| H  | 0.94594  | -2.70004 | 2.63061  |

19H

Filename: ts\_minMeTMS\_MeMe.out

B3LYP/6-31g\*: -777.62733037 Hartree

ZPE: 876.364 kJ/mol



DeltaG (excl. ZPE): -112.912 kJ/mol

Low frequencies: 42.62 72.82 92.04

Cartesian coordinates:

|    |          |          |          |
|----|----------|----------|----------|
| C  | 0.08780  | -0.13114 | -0.05903 |
| C  | 0.00430  | -0.02478 | 1.51061  |
| N  | 1.32549  | 0.03043  | 2.09230  |
| C  | 2.16129  | -1.15046 | 1.85447  |
| C  | 2.01841  | -1.68820 | 0.36960  |
| C  | 0.89367  | -1.33079 | -0.36774 |
| H  | 0.58131  | 0.78538  | -0.41343 |
| H  | -0.89156 | -0.17680 | -0.54484 |
| H  | -0.55805 | -0.87940 | 1.89477  |
| H  | -0.55225 | 0.87617  | 1.77887  |
| H  | 2.29084  | -2.74464 | 0.25580  |
| H  | 0.54916  | -1.99896 | -1.15605 |
| C  | 1.91167  | 1.36952  | 2.05946  |
| H  | 1.19462  | 2.06852  | 2.49854  |
| H  | 2.81670  | 1.41351  | 2.66472  |
| H  | 2.15494  | 1.73035  | 1.04477  |
| Si | 3.40933  | -1.09342 | -1.18684 |
| C  | 4.94786  | -2.05424 | -0.70360 |
| H  | 5.43180  | -1.68125 | 0.20130  |
| H  | 4.75051  | -3.12455 | -0.58277 |
| H  | 5.66046  | -1.94618 | -1.53297 |
| C  | 2.73557  | -1.74037 | -2.81644 |
| H  | 2.44666  | -2.79648 | -2.76713 |
| H  | 1.88386  | -1.16371 | -3.19177 |
| H  | 3.53504  | -1.66482 | -3.56510 |
| C  | 3.64129  | 0.76479  | -1.20846 |
| H  | 4.34792  | 0.98886  | -2.01974 |
| H  | 2.71976  | 1.31238  | -1.43068 |
| H  | 4.07085  | 1.16037  | -0.28451 |
| C  | 1.62528  | -2.32932 | 2.72305  |
| H  | 2.23192  | -3.22905 | 2.57955  |
| H  | 1.67953  | -2.03960 | 3.77564  |
| H  | 0.58888  | -2.58505 | 2.48693  |
| C  | 3.61679  | -0.91521 | 2.27967  |
| H  | 4.18274  | -1.84545 | 2.18381  |
| H  | 4.12320  | -0.14466 | 1.69385  |
| H  | 3.64840  | -0.61943 | 3.33259  |

20A

Filename: TS2\_TMS\_f.out

B3LYP/6-31g\*: -659.68591593 Hartree

ZPE: 651.231 kJ/mol

DeltaG (excl. ZPE): -102.061 kJ/mol

Low frequencies: -244.78 37.24 90.73

Cartesian coordinates:

|   |          |          |          |
|---|----------|----------|----------|
| C | 0.00000  | 0.00000  | 0.00000  |
| C | 0.00000  | 0.00000  | 2.10800  |
| N | 1.30422  | 0.00000  | 2.41075  |
| C | 2.10564  | -1.13163 | 2.03587  |
| C | 2.08256  | -1.35665 | 0.42468  |
| C | 0.70420  | -1.18754 | -0.04738 |
| H | 0.51263  | 0.95661  | -0.02118 |
| H | -1.03738 | 0.02211  | -0.32597 |
| H | -0.55163 | -0.91728 | 2.27840  |
| H | -0.55018 | 0.92621  | 2.24614  |
| H | 1.77412  | 0.90125  | 2.41161  |
| H | 3.13006  | -0.99367 | 2.38318  |
| H | 1.69826  | -2.03082 | 2.50460  |
| H | 2.37223  | -2.40707 | 0.29747  |
| H | 0.13923  | -2.08603 | -0.30192 |

|    |         |          |          |
|----|---------|----------|----------|
| Si | 3.48680 | -0.31197 | -0.46733 |
| C  | 5.10511 | -1.15809 | -0.00804 |
| H  | 5.30146 | -1.15732 | 1.07079  |
| H  | 5.13096 | -2.19809 | -0.35340 |
| H  | 5.94397 | -0.63725 | -0.48553 |
| C  | 3.16724 | -0.37017 | -2.31915 |
| H  | 3.14055 | -1.40061 | -2.69233 |
| H  | 2.22231 | 0.11166  | -2.59477 |
| H  | 3.96904 | 0.14936  | -2.85730 |
| C  | 3.48086 | 1.46994  | 0.17422  |
| H  | 4.27844 | 2.02348  | -0.33740 |
| H  | 2.55180 | 2.01558  | -0.02957 |
| H  | 3.70614 | 1.54264  | 1.24644  |

20B

Filename: TS2\_TMS\_eqMe\_f.out

B3LYP/6-31g\*: -699.00124108 Hartree

ZPE: 725.280 kJ/mol

DeltaG (excl. ZPE): -104.300 kJ/mol

Low frequencies: -261.24 56.39 83.45

Cartesian coordinates:

|    |          |          |          |
|----|----------|----------|----------|
| C  | 0.00000  | 0.00000  | 0.00000  |
| C  | 0.00000  | 0.00000  | 2.07213  |
| N  | 1.29780  | 0.00000  | 2.41349  |
| C  | 2.11877  | -1.12035 | 2.03237  |
| C  | 2.17785  | -1.19548 | 0.38314  |
| C  | 0.78485  | -1.13678 | -0.06987 |
| H  | 0.45051  | 0.98687  | -0.04917 |
| H  | -1.04353 | -0.04806 | -0.30325 |
| H  | -0.55451 | -0.91607 | 2.24197  |
| H  | -0.55383 | 0.92408  | 2.21164  |
| H  | 1.76762  | 0.90208  | 2.43914  |
| H  | 1.58740  | -2.02670 | 2.33886  |
| H  | 2.56564  | -2.20589 | 0.19964  |
| H  | 0.27648  | -2.07724 | -0.29191 |
| Si | 3.41754  | 0.03132  | -0.53056 |
| C  | 5.15581  | -0.68170 | -0.38980 |
| H  | 5.56951  | -0.63861 | 0.62231  |
| H  | 5.19393  | -1.72431 | -0.72720 |
| H  | 5.82946  | -0.11050 | -1.04055 |
| C  | 2.89323  | 0.06951  | -2.33966 |
| H  | 2.90090  | -0.93341 | -2.78282 |
| H  | 1.89399  | 0.49349  | -2.48756 |
| H  | 3.59711  | 0.68220  | -2.91579 |
| C  | 3.34365  | 1.77542  | 0.20820  |
| H  | 4.02880  | 2.41579  | -0.36184 |
| H  | 2.35567  | 2.24629  | 0.13420  |
| H  | 3.67719  | 1.82759  | 1.25187  |
| C  | 3.48990  | -1.09944 | 2.69846  |
| H  | 4.09713  | -1.93067 | 2.33184  |
| H  | 4.03128  | -0.16997 | 2.50025  |
| H  | 3.37799  | -1.21077 | 3.78106  |

20C

Filename: TS2\_TMS\_axMe\_f.out

B3LYP/6-31g\*: -699.00193954 Hartree

ZPE: 725.016 kJ/mol

DeltaG (excl. ZPE): -106.284 kJ/mol

Low frequencies: -253.28 37.51 68.72

Cartesian coordinates:

|   |         |         |         |
|---|---------|---------|---------|
| C | 0.00000 | 0.00000 | 0.00000 |
| C | 0.00000 | 0.00000 | 2.10159 |

|    |          |          |          |
|----|----------|----------|----------|
| N  | 1.30364  | 0.00000  | 2.40506  |
| C  | 2.13985  | -1.12862 | 2.05358  |
| C  | 2.08590  | -1.35251 | 0.42963  |
| C  | 0.70951  | -1.18447 | -0.04621 |
| H  | 0.50824  | 0.95900  | -0.01701 |
| H  | -1.03553 | 0.01835  | -0.33203 |
| H  | -0.56200 | -0.90852 | 2.27619  |
| H  | -0.54313 | 0.93108  | 2.23462  |
| H  | 1.76623  | 0.90476  | 2.39546  |
| H  | 3.16220  | -0.86223 | 2.32932  |
| H  | 2.37422  | -2.40118 | 0.29120  |
| H  | 0.14963  | -2.08186 | -0.31430 |
| Si | 3.48143  | -0.31034 | -0.47529 |
| C  | 5.10660  | -1.14150 | -0.00974 |
| H  | 5.30553  | -1.12616 | 1.06857  |
| H  | 5.13654  | -2.18580 | -0.34185 |
| H  | 5.94189  | -0.62315 | -0.49599 |
| C  | 3.16362  | -0.39428 | -2.32666 |
| H  | 3.14302  | -1.42996 | -2.68558 |
| H  | 2.21557  | 0.07780  | -2.60838 |
| H  | 3.96233  | 0.12265  | -2.87182 |
| C  | 3.46670  | 1.47951  | 0.14319  |
| H  | 4.26503  | 2.02951  | -0.37098 |
| H  | 2.53648  | 2.01845  | -0.07236 |
| H  | 3.68488  | 1.56686  | 1.21578  |
| C  | 1.74398  | -2.41469 | 2.78761  |
| H  | 2.46036  | -3.20544 | 2.54891  |
| H  | 1.76101  | -2.25492 | 3.87003  |
| H  | 0.75049  | -2.77329 | 2.50006  |

20D

Filename: TS2\_TMS\_MeMe\_f.out

B3LYP/6-31g\*: -738.31441480 Hartree

ZPE: 798.378 kJ/mol

DeltaG (excl. ZPE): -107.442 kJ/mol

Low frequencies: -269.38 52.25 77.59

Cartesian coordinates:

|    |          |          |          |
|----|----------|----------|----------|
| C  | 0.00000  | 0.00000  | 0.00000  |
| C  | 0.00000  | 0.00000  | 2.06978  |
| N  | 1.29771  | 0.00000  | 2.40894  |
| C  | 2.16649  | -1.10266 | 2.04212  |
| C  | 2.19846  | -1.16071 | 0.37290  |
| C  | 0.80645  | -1.12087 | -0.08512 |
| H  | 0.43262  | 0.99517  | -0.03318 |
| H  | -1.04019 | -0.06238 | -0.31203 |
| H  | -0.56586 | -0.90741 | 2.23698  |
| H  | -0.54412 | 0.92941  | 2.21154  |
| H  | 1.75327  | 0.90891  | 2.43749  |
| H  | 2.60294  | -2.16065 | 0.17146  |
| H  | 0.31919  | -2.06187 | -0.34569 |
| Si | 3.39486  | 0.07786  | -0.58381 |
| C  | 5.16458  | -0.55171 | -0.42307 |
| H  | 5.59971  | -0.40397 | 0.56969  |
| H  | 5.24078  | -1.61693 | -0.67213 |
| H  | 5.79725  | -0.01146 | -1.13825 |
| C  | 2.87392  | 0.00265  | -2.39366 |
| H  | 2.92471  | -1.02016 | -2.78578 |
| H  | 1.85796  | 0.37620  | -2.56238 |
| H  | 3.55280  | 0.61441  | -2.99997 |
| C  | 3.25089  | 1.85605  | 0.05654  |
| H  | 3.92952  | 2.48277  | -0.53625 |
| H  | 2.25144  | 2.29020  | -0.06651 |
| H  | 3.55658  | 1.98134  | 1.10218  |

|   |         |          |         |
|---|---------|----------|---------|
| C | 3.55954 | -0.87274 | 2.63230 |
| H | 4.25546 | -1.62633 | 2.25698 |
| H | 3.96135 | 0.11361  | 2.38406 |
| H | 3.51909 | -0.96293 | 3.72264 |
| C | 1.60917 | -2.44314 | 2.55645 |
| H | 2.31517 | -3.24383 | 2.31983 |
| H | 1.49116 | -2.40666 | 3.64432 |
| H | 0.64841 | -2.71487 | 2.11018 |

20E

Filename: TS2\_MeTMS\_f.out

B3LYP/6-31g\*: -698.99792305 Hartree

ZPE: 724.832 kJ/mol

DeltaG (excl. ZPE): -107.765 kJ/mol

Low frequencies: -294.13 30.82 69.61

Cartesian coordinates:

|    |          |          |          |
|----|----------|----------|----------|
| C  | 0.00000  | 0.00000  | 0.00000  |
| C  | 0.00000  | 0.00000  | 2.06651  |
| N  | 1.31523  | 0.00000  | 2.33582  |
| C  | 2.05011  | -1.20036 | 1.99699  |
| C  | 1.77714  | -1.72900 | 0.49835  |
| C  | 0.49088  | -1.29466 | -0.03891 |
| H  | 0.66668  | 0.85730  | -0.01191 |
| H  | -0.99896 | 0.19490  | -0.38317 |
| H  | -0.55108 | -0.91121 | 2.26818  |
| H  | -0.54543 | 0.92528  | 2.22894  |
| H  | 3.11096  | -1.02465 | 2.17543  |
| H  | 1.73008  | -2.01028 | 2.65932  |
| H  | 1.76543  | -2.82396 | 0.56663  |
| H  | -0.20055 | -2.07183 | -0.36706 |
| C  | 2.04169  | 1.27627  | 2.38713  |
| H  | 1.39526  | 2.04425  | 2.81485  |
| H  | 2.91751  | 1.16101  | 3.02897  |
| H  | 2.37021  | 1.59037  | 1.38851  |
| Si | 3.29259  | -1.42568 | -0.74149 |
| C  | 4.77162  | -2.27603 | 0.05710  |
| H  | 5.08427  | -1.80933 | 0.99847  |
| H  | 4.57862  | -3.33721 | 0.25219  |
| H  | 5.62983  | -2.22330 | -0.62427 |
| C  | 2.80856  | -2.25466 | -2.35862 |
| H  | 2.55477  | -3.31203 | -2.21905 |
| H  | 1.95324  | -1.76108 | -2.83449 |
| H  | 3.64455  | -2.21355 | -3.06714 |
| C  | 3.61878  | 0.41515  | -0.99008 |
| H  | 4.39023  | 0.52791  | -1.76249 |
| H  | 2.73872  | 0.96411  | -1.34405 |
| H  | 4.00315  | 0.90724  | -0.08996 |

20F

Filename: TS2\_MeTMS\_eqMe\_f.out

B3LYP/6-31g\*: -738.30962182 Hartree

ZPE: 800.190 kJ/mol

DeltaG (excl. ZPE): -108.484 kJ/mol

Low frequencies: -299.90 43.93 83.91

Cartesian coordinates:

|   |         |          |          |
|---|---------|----------|----------|
| C | 0.00000 | 0.00000  | 0.00000  |
| C | 0.00000 | 0.00000  | 2.02046  |
| N | 1.31092 | 0.00000  | 2.33084  |
| C | 2.02653 | -1.22486 | 2.01694  |
| C | 1.89624 | -1.60460 | 0.41913  |
| C | 0.55768 | -1.26847 | -0.06294 |
| H | 0.62818 | 0.88537  | -0.05207 |

|    |          |          |          |
|----|----------|----------|----------|
| H  | -1.02134 | 0.14518  | -0.34504 |
| H  | -0.55690 | -0.90529 | 2.23580  |
| H  | -0.54888 | 0.92506  | 2.17366  |
| H  | 1.46572  | -2.03014 | 2.50181  |
| H  | 1.99538  | -2.69829 | 0.41027  |
| H  | -0.11144 | -2.08705 | -0.33292 |
| C  | 2.02140  | 1.28446  | 2.40120  |
| H  | 1.31895  | 2.05998  | 2.70979  |
| H  | 2.81467  | 1.22327  | 3.14761  |
| H  | 2.46154  | 1.55522  | 1.43525  |
| Si | 3.30386  | -1.07628 | -0.87588 |
| C  | 4.85601  | -2.07873 | -0.50235 |
| H  | 5.40074  | -1.73555 | 0.38203  |
| H  | 4.63784  | -3.14575 | -0.37650 |
| H  | 5.53789  | -1.99131 | -1.35774 |
| C  | 2.61500  | -1.59443 | -2.55242 |
| H  | 2.35477  | -2.65928 | -2.57888 |
| H  | 1.72433  | -1.02208 | -2.83607 |
| H  | 3.37082  | -1.42855 | -3.32968 |
| C  | 3.67903  | 0.77453  | -0.87883 |
| H  | 4.36006  | 0.97858  | -1.71514 |
| H  | 2.79272  | 1.39883  | -1.04120 |
| H  | 4.18669  | 1.11540  | 0.02996  |
| C  | 3.45545  | -1.26296 | 2.54236  |
| H  | 3.89020  | -2.24325 | 2.33246  |
| H  | 4.09622  | -0.50589 | 2.08402  |
| H  | 3.46385  | -1.12138 | 3.62808  |

20G

Filename: TS2\_MeTMS\_axMe\_f.out

B3LYP/6-31g\*: -738.31388921 Hartree

ZPE: 798.935 kJ/mol

DeltaG (excl. ZPE): -111.179 kJ/mol

Low frequencies: -310.49 42.19 47.79

Cartesian coordinates:

|    |          |          |          |
|----|----------|----------|----------|
| C  | 0.00000  | 0.00000  | 0.00000  |
| C  | 0.00000  | 0.00000  | 2.04232  |
| N  | 1.31681  | 0.00000  | 2.31220  |
| C  | 2.09025  | -1.20218 | 1.98337  |
| C  | 1.66968  | -1.82472 | 0.56519  |
| C  | 0.43188  | -1.31773 | -0.01224 |
| H  | 0.70233  | 0.82827  | -0.01681 |
| H  | -0.97901 | 0.23014  | -0.41396 |
| H  | -0.55682 | -0.90348 | 2.25989  |
| H  | -0.54073 | 0.92756  | 2.20927  |
| H  | 3.13290  | -0.87769 | 1.95928  |
| H  | 1.55374  | -2.90606 | 0.70506  |
| H  | -0.28451 | -2.06322 | -0.35922 |
| C  | 2.03769  | 1.27917  | 2.34241  |
| H  | 1.38148  | 2.05931  | 2.73194  |
| H  | 2.89966  | 1.18688  | 3.00731  |
| H  | 2.39139  | 1.56704  | 1.34335  |
| Si | 3.16733  | -1.74757 | -0.73957 |
| C  | 4.57324  | -2.71595 | 0.05639  |
| H  | 4.93441  | -2.26618 | 0.98850  |
| H  | 4.28580  | -3.75237 | 0.26812  |
| H  | 5.42585  | -2.75162 | -0.63311 |
| C  | 2.56336  | -2.58017 | -2.31317 |
| H  | 2.20551  | -3.59967 | -2.12750 |
| H  | 1.75412  | -2.01835 | -2.79365 |
| H  | 3.38440  | -2.65294 | -3.03660 |
| C  | 3.64967  | 0.04892  | -1.04463 |
| H  | 4.44587  | 0.07697  | -1.79916 |

|   |         |          |          |
|---|---------|----------|----------|
| H | 2.82095 | 0.64901  | -1.43733 |
| H | 4.04662 | 0.54253  | -0.15034 |
| C | 1.95290 | -2.28080 | 3.07044  |
| H | 2.57843 | -3.14306 | 2.82191  |
| H | 2.27911 | -1.88862 | 4.03799  |
| H | 0.91888 | -2.62911 | 3.16404  |

20H

Filename: TS2\_MeTMS\_MeMe\_f.out

B3LYP/6-31g\*: -777.62043044 Hartree

ZPE: 873.766 kJ/mol

DeltaG (excl. ZPE): -110.951 kJ/mol

Low frequencies: -304.04 47.65 75.02

Cartesian coordinates:

|    |          |          |          |
|----|----------|----------|----------|
| C  | 0.00000  | 0.00000  | 0.00000  |
| C  | 0.00000  | 0.00000  | 2.00702  |
| N  | 1.31000  | 0.00000  | 2.32792  |
| C  | 2.07350  | -1.21514 | 2.02166  |
| C  | 1.93900  | -1.55679 | 0.39900  |
| C  | 0.58895  | -1.25412 | -0.07332 |
| H  | 0.60789  | 0.89935  | -0.05416 |
| H  | -1.02554 | 0.12214  | -0.34179 |
| H  | -0.57384 | -0.89198 | 2.21892  |
| H  | -0.54023 | 0.93019  | 2.15900  |
| H  | 2.07171  | -2.64517 | 0.35627  |
| H  | -0.05937 | -2.08661 | -0.35093 |
| C  | 1.98837  | 1.30365  | 2.41044  |
| H  | 1.25260  | 2.06602  | 2.67008  |
| H  | 2.74463  | 1.27916  | 3.19585  |
| H  | 2.46672  | 1.57172  | 1.46237  |
| Si | 3.30620  | -0.96333 | -0.91023 |
| C  | 4.90747  | -1.90210 | -0.57634 |
| H  | 5.46897  | -1.52591 | 0.28369  |
| H  | 4.73538  | -2.97498 | -0.42996 |
| H  | 5.55532  | -1.80061 | -1.45626 |
| C  | 2.61201  | -1.50721 | -2.57742 |
| H  | 2.39570  | -2.58194 | -2.60186 |
| H  | 1.69403  | -0.97218 | -2.84652 |
| H  | 3.34818  | -1.30936 | -3.36600 |
| C  | 3.60968  | 0.90116  | -0.92437 |
| H  | 4.25959  | 1.12809  | -1.77938 |
| H  | 2.69685  | 1.49175  | -1.06352 |
| H  | 4.12879  | 1.26443  | -0.03085 |
| C  | 1.46163  | -2.42503 | 2.76853  |
| H  | 2.09209  | -3.30458 | 2.61337  |
| H  | 1.42202  | -2.22165 | 3.84337  |
| H  | 0.45695  | -2.68498 | 2.42402  |
| C  | 3.53666  | -1.08170 | 2.45069  |
| H  | 4.06540  | -2.00594 | 2.20874  |
| H  | 4.05820  | -0.25955 | 1.95735  |
| H  | 3.60331  | -0.93849 | 3.53477  |

21A

Filename: int2\_TMS\_f.out

B3LYP/6-31g\*: -659.69740404 Hartree

ZPE: 648.553 kJ/mol

DeltaG (excl. ZPE): -108.422 kJ/mol

Low frequencies: 32.62 78.31 87.90

Cartesian coordinates:

|   |          |          |         |
|---|----------|----------|---------|
| C | -1.76211 | -2.40990 | 2.00941 |
| C | 1.65068  | 0.35878  | 3.22898 |
| N | 1.08426  | -0.51017 | 2.48441 |

|    |          |          |          |
|----|----------|----------|----------|
| C  | 1.69347  | -1.71130 | 1.84381  |
| C  | 0.72170  | -2.89210 | 1.98644  |
| C  | -0.60033 | -2.53749 | 1.35360  |
| H  | -1.83841 | -2.58336 | 3.08161  |
| H  | -2.68607 | -2.17770 | 1.48732  |
| H  | 2.71927  | 0.29305  | 3.41895  |
| H  | 1.06376  | 1.16030  | 3.67011  |
| H  | 0.06763  | -0.45746 | 2.32061  |
| H  | 1.84861  | -1.44636 | 0.79125  |
| H  | 2.66410  | -1.87871 | 2.31626  |
| H  | 0.57270  | -3.08403 | 3.05904  |
| H  | -0.58735 | -2.37571 | 0.27387  |
| Si | 1.47002  | -4.55088 | 1.25942  |
| C  | 3.15633  | -4.81521 | 2.06818  |
| H  | 3.89779  | -4.06350 | 1.77064  |
| H  | 3.09353  | -4.81959 | 3.16310  |
| H  | 3.55923  | -5.78995 | 1.76758  |
| C  | 0.26422  | -5.91517 | 1.72628  |
| H  | 0.16914  | -6.01801 | 2.81369  |
| H  | -0.73535 | -5.73247 | 1.31697  |
| H  | 0.61087  | -6.87911 | 1.33553  |
| C  | 1.64068  | -4.36610 | -0.61050 |
| H  | 2.06195  | -5.28599 | -1.03387 |
| H  | 0.67478  | -4.20154 | -1.10166 |
| H  | 2.31254  | -3.54861 | -0.90016 |

21B

Filename: int2\_TMS\_eqMe\_f.out

B3LYP/6-31g\*: -699.00542330 Hartree

ZPE: 723.631 kJ/mol

DeltaG (excl. ZPE): -108.304 kJ/mol

Low frequencies: 48.27 78.15 115.09

Cartesian coordinates:

|    |          |          |          |
|----|----------|----------|----------|
| C  | 0.03069  | -0.37316 | -0.50806 |
| C  | 0.18575  | 0.39045  | 2.41609  |
| N  | 1.44619  | 0.15603  | 2.34207  |
| C  | 2.04369  | -1.17099 | 2.07602  |
| C  | 2.15498  | -1.35115 | 0.51085  |
| C  | 0.75535  | -1.40919 | -0.05477 |
| H  | 0.43929  | 0.63041  | -0.60396 |
| H  | -0.98476 | -0.51242 | -0.86894 |
| H  | -0.51112 | -0.43763 | 2.47470  |
| H  | -0.17301 | 1.41410  | 2.47320  |
| H  | 2.08545  | 0.95060  | 2.27546  |
| H  | 1.31235  | -1.89462 | 2.45329  |
| H  | 2.58014  | -2.36249 | 0.42586  |
| H  | 0.27620  | -2.38995 | -0.03342 |
| Si | 3.44967  | -0.24262 | -0.46153 |
| C  | 5.16975  | -0.97295 | -0.19846 |
| H  | 5.52688  | -0.91551 | 0.83494  |
| H  | 5.20862  | -2.02455 | -0.50736 |
| H  | 5.89276  | -0.43057 | -0.81991 |
| C  | 3.02697  | -0.30448 | -2.29368 |
| H  | 2.96211  | -1.33775 | -2.65410 |
| H  | 2.08124  | 0.18944  | -2.53568 |
| H  | 3.81930  | 0.19146  | -2.86727 |
| C  | 3.42367  | 1.55654  | 0.15907  |
| H  | 4.09769  | 2.15404  | -0.46700 |
| H  | 2.43772  | 2.03321  | 0.08634  |
| H  | 3.80102  | 1.67209  | 1.18571  |
| C  | 3.34726  | -1.31789 | 2.86095  |
| H  | 3.80520  | -2.28072 | 2.61945  |
| H  | 4.06974  | -0.53439 | 2.61376  |

H            3.15819            -1.29179            3.93836

21C

Filename: int2\_TMS\_axMe\_f.out

B3LYP/6-31g\*:        -699.01261427 Hartree

ZPE:                    723.016 kJ/mol

DeltaG (excl. ZPE):   -110.440 kJ/mol

Low frequencies: 42.41 57.86 106.31

Cartesian coordinates:

|    |          |          |          |
|----|----------|----------|----------|
| C  | -1.61163 | 0.67551  | 0.58135  |
| C  | 2.67954  | 0.91085  | 1.55879  |
| N  | 1.65339  | 0.23192  | 1.21787  |
| C  | 1.21798  | -1.14347 | 1.65645  |
| C  | -0.30643 | -1.03380 | 1.92586  |
| C  | -0.99195 | -0.50829 | 0.68663  |
| H  | -1.68835 | 1.35993  | 1.42500  |
| H  | -2.11040 | 0.97610  | -0.33584 |
| H  | 3.42327  | 0.48501  | 2.22488  |
| H  | 2.80418  | 1.92138  | 1.17809  |
| H  | 0.94571  | 0.66839  | 0.60657  |
| H  | -0.45330 | -0.31993 | 2.75028  |
| H  | -0.96886 | -1.16368 | -0.18716 |
| Si | -1.17861 | -2.70370 | 2.49535  |
| C  | -0.82490 | -3.01972 | 4.32273  |
| H  | 0.21600  | -3.27681 | 4.54431  |
| H  | -1.09762 | -2.15583 | 4.94076  |
| H  | -1.44083 | -3.86186 | 4.66200  |
| C  | -3.02675 | -2.43758 | 2.25883  |
| H  | -3.38402 | -1.55894 | 2.80849  |
| H  | -3.30154 | -2.30653 | 1.20716  |
| H  | -3.57605 | -3.30724 | 2.63920  |
| C  | -0.54856 | -4.11150 | 1.40418  |
| H  | -1.08101 | -5.03632 | 1.65763  |
| H  | -0.73019 | -3.92370 | 0.33898  |
| H  | 0.52094  | -4.31785 | 1.53258  |
| H  | 1.37292  | -1.76095 | 0.76152  |
| C  | 2.09024  | -1.65661 | 2.79318  |
| H  | 1.79706  | -2.68103 | 3.02724  |
| H  | 3.15018  | -1.69058 | 2.51822  |
| H  | 1.96873  | -1.05692 | 3.70198  |

21D

Filename: int2\_TMS\_MeMe\_f.out

B3LYP/6-31g\*:        -738.32590672 Hartree

ZPE:                    797.023 kJ/mol

DeltaG (excl. ZPE):   -113.194 kJ/mol

Low frequencies: 31.59 53.67 101.01

Cartesian coordinates:

|    |          |          |         |
|----|----------|----------|---------|
| C  | 1.71391  | -0.14624 | 5.42777 |
| C  | 2.36606  | 1.38315  | 1.39580 |
| N  | 1.74138  | 0.57227  | 2.15751 |
| C  | 1.37871  | -0.89454 | 1.94333 |
| C  | 1.69359  | -1.55997 | 3.32324 |
| C  | 1.05036  | -0.80559 | 4.46658 |
| H  | 2.80202  | -0.11059 | 5.45390 |
| H  | 1.19159  | 0.33859  | 6.24809 |
| H  | 2.70392  | 1.06622  | 0.41420 |
| H  | 2.56155  | 2.39718  | 1.73602 |
| H  | 1.46387  | 0.89303  | 3.09778 |
| H  | 2.78507  | -1.49975 | 3.44967 |
| H  | -0.03812 | -0.82905 | 4.51792 |
| Si | 1.29764  | -3.47496 | 3.60896 |



|   |          |          |          |
|---|----------|----------|----------|
| C | 1.71255  | -4.56720 | 2.12220  |
| H | 1.03978  | -4.42419 | 1.26860  |
| H | 2.74524  | -4.44947 | 1.77537  |
| H | 1.60051  | -5.61290 | 2.43633  |
| C | 2.40777  | -3.94724 | 5.05545  |
| H | 3.47052  | -3.86905 | 4.79634  |
| H | 2.22741  | -3.32123 | 5.93577  |
| H | 2.21990  | -4.98746 | 5.34704  |
| C | -0.52258 | -3.69740 | 4.05961  |
| H | -0.71028 | -4.76001 | 4.25719  |
| H | -0.79870 | -3.15078 | 4.96788  |
| H | -1.21012 | -3.39625 | 3.26085  |
| C | -0.11593 | -0.90169 | 1.57114  |
| H | -0.44104 | -1.93656 | 1.43582  |
| H | -0.74234 | -0.44970 | 2.34498  |
| H | -0.28575 | -0.36663 | 0.63143  |
| C | 2.23205  | -1.44625 | 0.80205  |
| H | 1.98880  | -2.49774 | 0.65329  |
| H | 2.02629  | -0.93877 | -0.14713 |
| H | 3.30259  | -1.37811 | 1.02505  |

21E

Filename: int2\_MeTMS\_f.out

B3LYP/6-31g\*: -699.01605693 Hartree

ZPE: 722.949 kJ/mol

DeltaG (excl. ZPE): -112.647 kJ/mol

Low frequencies: 32.02 62.76 83.24

Cartesian coordinates:

|    |         |          |          |
|----|---------|----------|----------|
| C  | 4.00464 | -3.94147 | 1.56084  |
| C  | 3.86872 | -1.47823 | -0.70483 |
| N  | 2.81830 | -1.03645 | -0.11046 |
| C  | 2.87418 | -0.59298 | 1.31406  |
| C  | 2.81530 | -1.82389 | 2.24797  |
| C  | 4.01918 | -2.69483 | 2.05554  |
| H  | 3.07833 | -4.42883 | 1.26225  |
| H  | 4.91212 | -4.53381 | 1.48265  |
| H  | 4.83604 | -1.38769 | -0.22592 |
| H  | 3.79117 | -1.91688 | -1.69490 |
| H  | 1.90769 | -2.39711 | 2.00717  |
| H  | 4.97687 | -2.26517 | 2.35801  |
| Si | 2.58637 | -1.28507 | 4.12075  |
| C  | 1.05425 | -0.18401 | 4.20652  |
| H  | 1.18378 | 0.77699  | 3.69408  |
| H  | 0.16728 | -0.67691 | 3.79026  |
| H  | 0.82779 | 0.04704  | 5.25453  |
| C  | 2.33895 | -2.87196 | 5.09846  |
| H  | 1.45233 | -3.42206 | 4.76161  |
| H  | 3.20167 | -3.54154 | 5.01346  |
| H  | 2.19830 | -2.64511 | 6.16191  |
| C  | 4.12628 | -0.34640 | 4.67484  |
| H  | 4.01366 | -0.03983 | 5.72185  |
| H  | 5.03153 | -0.96190 | 4.61835  |
| H  | 4.29999 | 0.56802  | 4.09429  |
| H  | 2.03222 | 0.08455  | 1.46641  |
| C  | 1.48035 | -1.10776 | -0.72988 |
| H  | 1.54527 | -1.59235 | -1.70425 |
| H  | 0.81704 | -1.67513 | -0.07305 |
| H  | 1.09607 | -0.09047 | -0.84184 |
| H  | 3.80374 | -0.03299 | 1.44625  |

21F

Filename: int2\_MeTMS\_eqMe\_f.out

B3LYP/6-31g\*: -738.32672988 Hartree  
 ZPE: 797.822 kJ/mol  
 DeltaG (excl. ZPE): -114.855 kJ/mol  
 Low frequencies: 38.12 50.26 75.12

Cartesian coordinates:

|    |         |          |          |
|----|---------|----------|----------|
| C  | 4.44737 | 2.02965  | -0.31160 |
| C  | 2.80534 | -2.57959 | -0.45497 |
| N  | 2.44039 | -1.39768 | -0.12161 |
| C  | 2.73432 | -0.85864 | 1.27843  |
| C  | 3.94530 | 0.10196  | 1.23723  |
| C  | 3.69885 | 1.46187  | 0.64296  |
| H  | 5.28306 | 1.50746  | -0.77409 |
| H  | 4.26594 | 3.04752  | -0.64442 |
| H  | 3.29522 | -3.21826 | 0.27419  |
| H  | 2.62943 | -2.94449 | -1.46271 |
| H  | 4.73400 | -0.39909 | 0.65631  |
| H  | 2.89390 | 2.04844  | 1.08604  |
| Si | 4.79583 | 0.32369  | 3.00399  |
| C  | 4.69690 | -1.32215 | 3.93173  |
| H  | 3.67380 | -1.60281 | 4.21020  |
| H  | 5.13816 | -2.15113 | 3.36428  |
| H  | 5.26560 | -1.24283 | 4.86641  |
| C  | 6.58636 | 0.76846  | 2.63390  |
| H  | 7.11472 | -0.04702 | 2.12594  |
| H  | 6.65884 | 1.66273  | 2.00528  |
| H  | 7.12506 | 0.97723  | 3.56583  |
| C  | 3.95165 | 1.69578  | 3.98436  |
| H  | 4.47717 | 1.83431  | 4.93719  |
| H  | 3.98747 | 2.65394  | 3.45426  |
| H  | 2.90401 | 1.48234  | 4.22589  |
| H  | 3.02602 | -1.75617 | 1.83010  |
| C  | 1.76700 | -0.50781 | -1.09188 |
| H  | 1.72830 | -0.99498 | -2.06653 |
| H  | 0.75548 | -0.30377 | -0.73565 |
| H  | 2.33149 | 0.42581  | -1.14706 |
| C  | 1.44585 | -0.30904 | 1.89389  |
| H  | 1.63581 | -0.08116 | 2.94594  |
| H  | 1.10559 | 0.61228  | 1.41526  |
| H  | 0.63929 | -1.04811 | 1.85543  |

21G

Filename: int2\_MeTMS\_axMe\_f.out

B3LYP/6-31g\*: -738.32789759 Hartree  
 ZPE: 797.675 kJ/mol  
 DeltaG (excl. ZPE): -113.978 kJ/mol  
 Low frequencies: 46.66 58.03 94.81

Cartesian coordinates:

|    |          |          |          |
|----|----------|----------|----------|
| C  | 3.96136  | -2.30560 | -0.38940 |
| C  | 3.07329  | 0.43259  | 1.05865  |
| N  | 1.85106  | 0.07841  | 0.87551  |
| C  | 1.30119  | -1.12860 | 1.60505  |
| C  | 1.71405  | -2.38158 | 0.77401  |
| C  | 3.21062  | -2.48161 | 0.70819  |
| H  | 3.51732  | -2.08384 | -1.35834 |
| H  | 5.04064  | -2.42907 | -0.36723 |
| H  | 3.64809  | -0.00945 | 1.86345  |
| H  | 3.52043  | 1.20158  | 0.43609  |
| H  | 1.31174  | -2.26903 | -0.24396 |
| H  | 3.71577  | -2.72601 | 1.64595  |
| Si | 0.98689  | -4.09751 | 1.41911  |
| C  | -0.83710 | -4.23824 | 0.95281  |
| H  | -1.49572 | -3.55812 | 1.50151  |
| H  | -0.99346 | -4.07022 | -0.11968 |

|   |          |          |          |
|---|----------|----------|----------|
| H | -1.17766 | -5.25885 | 1.16751  |
| C | 1.95338  | -5.44292 | 0.52422  |
| H | 1.89258  | -5.33116 | -0.56469 |
| H | 3.01313  | -5.45248 | 0.79892  |
| H | 1.53615  | -6.42550 | 0.77586  |
| C | 1.24953  | -4.20930 | 3.28652  |
| H | 0.90958  | -5.18919 | 3.64345  |
| H | 2.30776  | -4.12239 | 3.56106  |
| H | 0.69135  | -3.45471 | 3.85331  |
| H | 1.84217  | -1.14433 | 2.55661  |
| C | -0.18824 | -0.94745 | 1.88810  |
| H | -0.51013 | -1.72450 | 2.58375  |
| H | -0.38666 | 0.01772  | 2.36543  |
| H | -0.80154 | -1.03488 | 0.98689  |
| C | 1.03892  | 0.68574  | -0.19781 |
| H | 0.18312  | 1.19745  | 0.24633  |
| H | 1.64755  | 1.39844  | -0.75470 |
| H | 0.68380  | -0.09977 | -0.86799 |

21H

Filename: int2\_MeTMS\_MeMe\_f.out

B3LYP/6-31g\*: -777.63280940 Hartree

ZPE: 872.013 kJ/mol

DeltaG (excl. ZPE): -118.598 kJ/mol

Low frequencies: 13.49 48.39 66.89

Cartesian coordinates:

|    |         |          |          |
|----|---------|----------|----------|
| C  | 3.65852 | -3.81239 | 1.00559  |
| C  | 0.91523 | -1.11681 | -0.72897 |
| N  | 2.10571 | -0.83007 | -0.35716 |
| C  | 2.41973 | -0.39902 | 1.12165  |
| C  | 2.58105 | -1.72291 | 1.93522  |
| C  | 3.75003 | -2.57168 | 1.49774  |
| H  | 2.69768 | -4.30131 | 0.85282  |
| H  | 4.54267 | -4.39783 | 0.76949  |
| H  | 0.08657 | -1.02097 | -0.03755 |
| H  | 0.72750 | -1.46076 | -1.74197 |
| H  | 1.66042 | -2.30256 | 1.76236  |
| H  | 4.74446 | -2.15197 | 1.65730  |
| Si | 2.62795 | -1.61176 | 3.91223  |
| C  | 0.94355 | -1.08784 | 4.59656  |
| H  | 0.71305 | -0.02633 | 4.46370  |
| H  | 0.12122 | -1.67194 | 4.16571  |
| H  | 0.93778 | -1.28291 | 5.67626  |
| C  | 2.97045 | -3.37139 | 4.49187  |
| H  | 2.25056 | -4.08702 | 4.07755  |
| H  | 3.97294 | -3.71712 | 4.22288  |
| H  | 2.88276 | -3.41418 | 5.58438  |
| C  | 3.98452 | -0.44871 | 4.52662  |
| H  | 4.10405 | -0.59110 | 5.60790  |
| H  | 4.95873 | -0.65567 | 4.06869  |
| H  | 3.75285 | 0.61168  | 4.37305  |
| C  | 1.23769 | 0.45323  | 1.60909  |
| H  | 1.52962 | 0.95176  | 2.53520  |
| H  | 0.98472 | 1.23412  | 0.88412  |
| H  | 0.34395 | -0.13424 | 1.83713  |
| C  | 3.22058 | -0.98295 | -1.31945 |
| H  | 3.93892 | -1.68788 | -0.89910 |
| H  | 2.82946 | -1.36762 | -2.26198 |
| H  | 3.69167 | -0.01284 | -1.48052 |
| C  | 3.68059 | 0.47674  | 1.09205  |
| H  | 3.89055 | 0.80220  | 2.11223  |
| H  | 4.56700 | -0.04784 | 0.73183  |
| H  | 3.52753 | 1.37537  | 0.48513  |

22E

Filename: TS3\_MeTMS\_f.out

B3LYP/6-31g\*: -699.00587191 Hartree

ZPE: 726.564 kJ/mol

DeltaG (excl. ZPE): -103.477 kJ/mol

Low frequencies: -9.80 63.74 109.17

Cartesian coordinates:

|    |          |          |          |
|----|----------|----------|----------|
| C  | 0.00000  | 0.00000  | 0.00000  |
| C  | 0.00000  | 0.00000  | 1.55145  |
| N  | 1.34816  | 0.00000  | 2.10135  |
| C  | 2.14073  | -1.12958 | 1.67371  |
| C  | 1.78632  | -1.72542 | 0.34626  |
| C  | 0.81811  | -1.19205 | -0.47971 |
| H  | 0.40738  | 0.95402  | -0.35356 |
| H  | -1.01589 | -0.07020 | -0.40276 |
| H  | -0.52888 | -0.89384 | 1.90817  |
| H  | -0.53656 | 0.87284  | 1.93246  |
| H  | 3.21191  | -0.90165 | 1.73866  |
| H  | 1.99727  | -1.98576 | 2.36570  |
| H  | 2.22601  | -2.69488 | 0.11243  |
| H  | 0.36979  | -1.85790 | -1.22186 |
| C  | 2.01239  | 1.29899  | 2.14258  |
| H  | 1.40026  | 1.99251  | 2.72634  |
| H  | 2.97757  | 1.20063  | 2.64823  |
| H  | 2.18804  | 1.75592  | 1.15153  |
| Si | 2.45694  | -0.68607 | -1.91814 |
| C  | 3.88652  | 0.22138  | -1.12407 |
| H  | 3.56666  | 1.09159  | -0.54219 |
| H  | 4.50230  | -0.42086 | -0.48680 |
| H  | 4.53200  | 0.59354  | -1.93129 |
| C  | 2.90741  | -2.32992 | -2.68998 |
| H  | 3.52520  | -2.95612 | -2.03833 |
| H  | 2.02788  | -2.90648 | -2.99694 |
| H  | 3.49334  | -2.13274 | -3.59749 |
| C  | 1.41925  | 0.40434  | -3.03454 |
| H  | 2.03450  | 0.64613  | -3.91240 |
| H  | 0.51479  | -0.09677 | -3.39278 |
| H  | 1.13521  | 1.34929  | -2.56280 |

22F

Filename: TS3\_MeTMS\_eqMe\_f.out

B3LYP/6-31g\*: -738.31529372 Hartree

ZPE: 802.830 kJ/mol

DeltaG (excl. ZPE): -106.798 kJ/mol

Low frequencies: -78.78 47.54 101.31

Cartesian coordinates:

|   |          |          |          |
|---|----------|----------|----------|
| C | 0.00000  | 0.00000  | 0.00000  |
| C | 0.00000  | 0.00000  | 1.56244  |
| N | 1.34701  | 0.00000  | 2.09992  |
| C | 2.11744  | -1.17041 | 1.72053  |
| C | 1.86155  | -1.66161 | 0.27479  |
| C | 0.78879  | -1.19161 | -0.45211 |
| H | 0.43939  | 0.94319  | -0.35123 |
| H | -1.01113 | -0.04430 | -0.41864 |
| H | -0.53523 | -0.88998 | 1.91594  |
| H | -0.53974 | 0.87462  | 1.93488  |
| H | 1.67339  | -2.02186 | 2.27142  |
| H | 2.20731  | -2.67583 | 0.06272  |
| H | 0.40767  | -1.78488 | -1.28144 |
| C | 1.96971  | 1.31835  | 2.17180  |
| H | 1.33294  | 1.96721  | 2.78068  |

|    |         |          |          |
|----|---------|----------|----------|
| H  | 2.93908 | 1.25799  | 2.66851  |
| H  | 2.11185 | 1.81048  | 1.19489  |
| Si | 3.02880 | -0.74271 | -1.52012 |
| C  | 4.46063 | -1.94333 | -1.36859 |
| H  | 4.95712 | -1.90234 | -0.39599 |
| H  | 4.15720 | -2.97621 | -1.56839 |
| H  | 5.19798 | -1.66482 | -2.13426 |
| C  | 2.15139 | -0.92868 | -3.16832 |
| H  | 1.81817 | -1.95441 | -3.35842 |
| H  | 1.29635 | -0.25465 | -3.27919 |
| H  | 2.87548 | -0.67355 | -3.95416 |
| C  | 3.45361 | 1.03446  | -1.13220 |
| H  | 4.13244 | 1.36721  | -1.93059 |
| H  | 2.58733 | 1.70219  | -1.15292 |
| H  | 3.97777 | 1.16276  | -0.18251 |
| C  | 3.58919 | -1.13336 | 2.13652  |
| H  | 4.04884 | -2.11017 | 1.95578  |
| H  | 4.16812 | -0.37847 | 1.59718  |
| H  | 3.66571 | -0.92420 | 3.20703  |

22G

Filename: TS3\_MeTMS\_axMe\_f.out

B3LYP/6-31g\*: -738.32204264 Hartree

ZPE: 800.880 kJ/mol

DeltaG (excl. ZPE): -107.862 kJ/mol

Low frequencies: -21.57 55.81 85.74

Cartesian coordinates:

|    |          |          |          |
|----|----------|----------|----------|
| C  | 0.00000  | 0.00000  | 0.00000  |
| C  | 0.00000  | 0.00000  | 1.56189  |
| N  | 1.34549  | 0.00000  | 2.10099  |
| C  | 2.16664  | -1.13742 | 1.70525  |
| C  | 1.93335  | -1.58972 | 0.24275  |
| C  | 0.83719  | -1.13736 | -0.46782 |
| H  | 0.41267  | 0.95672  | -0.35137 |
| H  | -1.00579 | -0.07379 | -0.42864 |
| H  | -0.54103 | -0.88425 | 1.91545  |
| H  | -0.53731 | 0.87676  | 1.93208  |
| H  | 3.21143  | -0.84579 | 1.84046  |
| H  | 2.26898  | -2.60360 | 0.00146  |
| H  | 0.53437  | -1.67427 | -1.36728 |
| C  | 2.00431  | 1.30069  | 2.12418  |
| H  | 1.36679  | 2.01851  | 2.64842  |
| H  | 2.94444  | 1.22531  | 2.67888  |
| H  | 2.22974  | 1.71911  | 1.12503  |
| Si | 3.30291  | -0.76852 | -1.28972 |
| C  | 4.89066  | -0.80717 | -0.29400 |
| H  | 4.93174  | -0.02661 | 0.47121  |
| H  | 5.07302  | -1.77768 | 0.17794  |
| H  | 5.71497  | -0.62176 | -0.99680 |
| C  | 3.23615  | -2.07174 | -2.63178 |
| H  | 3.41773  | -3.08187 | -2.24905 |
| H  | 2.28967  | -2.07294 | -3.18230 |
| H  | 4.03013  | -1.85564 | -3.35890 |
| C  | 2.85593  | 0.94709  | -1.88921 |
| H  | 3.68063  | 1.29625  | -2.52548 |
| H  | 1.94680  | 0.96576  | -2.49825 |
| H  | 2.75185  | 1.67374  | -1.07734 |
| C  | 1.91711  | -2.36407 | 2.61427  |
| H  | 2.57421  | -3.19866 | 2.34644  |
| H  | 2.11804  | -2.08198 | 3.65046  |
| H  | 0.88105  | -2.71066 | 2.54452  |

22H

Filename: TS3\_MeTMS\_MeMe\_f.out

B3LYP/6-31g\*: -777.62694822 Hartree

ZPE: 876.381 kJ/mol

DeltaG (excl. ZPE): -109.638 kJ/mol

Low frequencies: -42.27 51.06 92.62

Cartesian coordinates:

|    |          |          |          |
|----|----------|----------|----------|
| C  | 0.00000  | 0.00000  | 0.00000  |
| C  | 0.00000  | 0.00000  | 1.56308  |
| N  | 1.34829  | 0.00000  | 2.09850  |
| C  | 2.16048  | -1.16443 | 1.72406  |
| C  | 1.92226  | -1.60402 | 0.23961  |
| C  | 0.80784  | -1.16681 | -0.45197 |
| H  | 0.43839  | 0.94724  | -0.34485 |
| H  | -1.00758 | -0.04845 | -0.42637 |
| H  | -0.55280 | -0.87582 | 1.91528  |
| H  | -0.53157 | 0.88166  | 1.92949  |
| H  | 2.25384  | -2.61954 | 0.00326  |
| H  | 0.44983  | -1.74834 | -1.29983 |
| C  | 1.94301  | 1.33463  | 2.15520  |
| H  | 1.26195  | 1.98826  | 2.70776  |
| H  | 2.88534  | 1.31812  | 2.70265  |
| H  | 2.12360  | 1.79757  | 1.16968  |
| Si | 3.16650  | -0.75147 | -1.45513 |
| C  | 4.69407  | -1.81038 | -1.20709 |
| H  | 5.20785  | -1.62546 | -0.26170 |
| H  | 4.47414  | -2.87978 | -1.28913 |
| H  | 5.38708  | -1.55627 | -2.02140 |
| C  | 2.35470  | -1.14652 | -3.10130 |
| H  | 2.06332  | -2.19894 | -3.18997 |
| H  | 1.48079  | -0.52223 | -3.31278 |
| H  | 3.09422  | -0.95224 | -3.88968 |
| C  | 3.43833  | 1.08404  | -1.22195 |
| H  | 4.07641  | 1.41059  | -2.05550 |
| H  | 2.51573  | 1.66956  | -1.28097 |
| H  | 3.95733  | 1.33576  | -0.29419 |
| C  | 1.67254  | -2.39676 | 2.54825  |
| H  | 2.25167  | -3.29275 | 2.30239  |
| H  | 1.80748  | -2.17568 | 3.61013  |
| H  | 0.61701  | -2.62104 | 2.37340  |
| C  | 3.64622  | -0.96783 | 2.05860  |
| H  | 4.19480  | -1.89101 | 1.85155  |
| H  | 4.11463  | -0.15727 | 1.49501  |
| H  | 3.75998  | -0.75152 | 3.12482  |

23A

Filename: prod\_TMS\_2.out

B3LYP/6-31g\*: -250.67062876 Hartree

ZPE: 355.958 kJ/mol

DeltaG (excl. ZPE): -74.908 kJ/mol

Low frequencies: 169.38 295.04 402.09

Cartesian coordinates:

|   |          |          |          |
|---|----------|----------|----------|
| C | -0.53613 | 1.80275  | -1.46131 |
| C | -1.56583 | 2.15793  | -0.68648 |
| H | -2.35517 | 2.79347  | -1.08569 |
| H | -0.49421 | 2.11986  | -2.50299 |
| C | 0.60308  | 0.94673  | -0.95140 |
| H | 1.56688  | 1.37135  | -1.26230 |
| H | 0.55437  | -0.05020 | -1.41931 |
| C | -1.69442 | 1.70228  | 0.74857  |
| H | -1.50803 | 2.54885  | 1.42964  |
| H | -2.72647 | 1.38180  | 0.95258  |
| C | -0.71391 | 0.55342  | 1.04905  |

|   |          |          |         |
|---|----------|----------|---------|
| H | -0.63189 | 0.38236  | 2.12890 |
| H | -1.09517 | -0.37591 | 0.60522 |
| N | 0.63140  | 0.77449  | 0.50641 |
| H | 1.00782  | 1.62666  | 0.92197 |

23B

Filename: prod\_TMS\_eqMe.out

B3LYP/6-31g\*: -289.98753607 Hartree

ZPE: 429.651 kJ/mol

DeltaG (excl. ZPE): -79.724 kJ/mol

Low frequencies: 109.35 244.13 283.95

Cartesian coordinates:

|   |          |          |          |
|---|----------|----------|----------|
| C | 0.14252  | -0.51698 | 0.13900  |
| C | -1.11271 | -0.05743 | 0.11701  |
| H | -1.93117 | -0.72369 | -0.15332 |
| H | 0.34617  | -1.56438 | -0.08450 |
| C | 1.33643  | 0.36058  | 0.47036  |
| H | 1.68611  | 0.09682  | 1.48308  |
| C | -1.46184 | 1.36913  | 0.46844  |
| H | -1.75842 | 1.91839  | -0.44009 |
| H | -2.34213 | 1.39170  | 1.12729  |
| C | -0.27015 | 2.06781  | 1.14746  |
| H | -0.18839 | 1.72075  | 2.18598  |
| H | -0.42132 | 3.15315  | 1.18401  |
| N | 1.01522  | 1.79729  | 0.49488  |
| H | 0.96075  | 2.12355  | -0.47180 |
| C | 2.50376  | 0.11992  | -0.49375 |
| H | 3.34743  | 0.76691  | -0.23253 |
| H | 2.83605  | -0.92317 | -0.45559 |
| H | 2.20594  | 0.33743  | -1.52776 |

23C

Filename: prod\_TMS\_axMe.out

B3LYP/6-31g\*: -289.98753743 Hartree

ZPE: 429.655 kJ/mol

DeltaG (excl. ZPE): -79.724 kJ/mol

Low frequencies: 109.16 244.51 284.00

Cartesian coordinates:

|   |          |          |          |
|---|----------|----------|----------|
| C | -0.55727 | 1.64751  | -1.43061 |
| C | -1.69300 | 1.99417  | -0.81640 |
| H | -2.44665 | 2.57074  | -1.35159 |
| H | -0.37054 | 1.96536  | -2.45655 |
| C | 0.52130  | 0.81442  | -0.76128 |
| H | 1.36801  | 1.47913  | -0.51900 |
| C | -1.98443 | 1.62832  | 0.61947  |
| H | -2.76752 | 0.85353  | 0.65861  |
| H | -2.40012 | 2.49512  | 1.15367  |
| C | -0.70840 | 1.13116  | 1.32227  |
| H | -0.06626 | 1.98942  | 1.56047  |
| H | -0.95039 | 0.63956  | 2.27195  |
| N | 0.08531  | 0.20595  | 0.50663  |
| H | -0.49442 | -0.60506 | 0.28293  |
| C | 1.05232  | -0.28185 | -1.69205 |
| H | 1.48167  | 0.14998  | -2.60259 |
| H | 1.82511  | -0.86659 | -1.18268 |
| H | 0.24464  | -0.96131 | -1.99398 |

23D

Filename: prod\_TMS\_MeMe.out

B3LYP/6-31g\*: -329.30207771 Hartree

ZPE: 502.770 kJ/mol

DeltaG (excl. ZPE): -83.262 kJ/mol

Low frequencies: 107.78 224.49 235.03

Cartesian coordinates:

|   |          |          |          |
|---|----------|----------|----------|
| C | -0.21015 | -0.40136 | 1.61737  |
| C | -1.29054 | 0.38251  | 1.68926  |
| H | -2.27935 | -0.06541 | 1.78106  |
| H | -0.31962 | -1.48456 | 1.67799  |
| C | 1.20755  | 0.12626  | 1.44878  |
| C | -1.20659 | 1.88913  | 1.65660  |
| H | -1.55594 | 2.26511  | 0.68089  |
| H | -1.88748 | 2.32380  | 2.40267  |
| C | 0.23689  | 2.35026  | 1.91813  |
| H | 0.46093  | 2.25012  | 2.98702  |
| H | 0.36253  | 3.41024  | 1.66757  |
| N | 1.23947  | 1.58218  | 1.17128  |
| H | 1.06057  | 1.71592  | 0.17537  |
| C | 1.88109  | -0.58143 | 0.25884  |
| H | 1.30211  | -0.43943 | -0.66225 |
| H | 2.88759  | -0.17654 | 0.10397  |
| H | 1.96411  | -1.65865 | 0.43934  |
| C | 2.02792  | -0.15474 | 2.72690  |
| H | 2.01848  | -1.22414 | 2.96886  |
| H | 3.06523  | 0.16530  | 2.58249  |
| H | 1.61766  | 0.38282  | 3.58784  |

23E

Filename: prod\_MeTMS.out

B3LYP/6-31g\*: -289.98211726 Hartree

ZPE: 428.433 kJ/mol

DeltaG (excl. ZPE): -79.269 kJ/mol

Low frequencies: 156.14 204.45 262.52

Cartesian coordinates:

|   |          |          |          |
|---|----------|----------|----------|
| C | -0.86440 | 1.86894  | -1.56424 |
| C | -2.01669 | 1.70102  | -0.91195 |
| H | -2.96323 | 1.76199  | -1.44672 |
| H | -0.85178 | 2.04464  | -2.63829 |
| C | 0.47495  | 1.82714  | -0.87571 |
| H | 1.08717  | 2.67978  | -1.20428 |
| H | 1.02331  | 0.91617  | -1.20702 |
| C | -2.05716 | 1.42463  | 0.56901  |
| H | -2.38121 | 2.32583  | 1.11008  |
| H | -2.79902 | 0.64517  | 0.79192  |
| C | -0.67991 | 0.98301  | 1.07744  |
| H | -0.65611 | 1.00511  | 2.17325  |
| H | -0.49138 | -0.06673 | 0.77049  |
| N | 0.35619  | 1.88579  | 0.57946  |
| C | 1.64045  | 1.67438  | 1.22588  |
| H | 1.53641  | 1.80870  | 2.30832  |
| H | 2.06470  | 0.66624  | 1.04332  |
| H | 2.36275  | 2.41323  | 0.85983  |

23F

Filename: prod\_MeTMS\_eqMe.out

B3LYP/6-31g\*: -329.29624626 Hartree

ZPE: 502.557 kJ/mol

DeltaG (excl. ZPE): -84.338 kJ/mol

Low frequencies: 83.04 189.39 218.46

Cartesian coordinates:

|   |         |          |         |
|---|---------|----------|---------|
| C | 1.46929 | -0.34122 | 1.84062 |
| C | 0.36521 | -0.35677 | 2.58899 |
| H | 0.24283 | -1.10601 | 3.36956 |
| H | 2.26259 | -1.06704 | 2.01283 |



|   |          |          |          |
|---|----------|----------|----------|
| C | 1.70773  | 0.61690  | 0.69425  |
| H | 2.55081  | 1.28455  | 0.98137  |
| C | -0.72656 | 0.66033  | 2.39447  |
| H | -1.11265 | 1.00001  | 3.36541  |
| H | -1.57633 | 0.21162  | 1.85924  |
| C | -0.19029 | 1.85826  | 1.60876  |
| H | 0.46888  | 2.46178  | 2.26590  |
| H | -1.01762 | 2.50888  | 1.30209  |
| N | 0.50771  | 1.41852  | 0.39849  |
| C | 2.15060  | -0.18576 | -0.54343 |
| H | 3.02460  | -0.80128 | -0.30167 |
| H | 1.33846  | -0.84372 | -0.86898 |
| H | 2.42878  | 0.46293  | -1.37956 |
| C | 0.79753  | 2.55084  | -0.47241 |
| H | 1.50984  | 3.27332  | -0.02549 |
| H | 1.21446  | 2.21091  | -1.42419 |
| H | -0.13308 | 3.08525  | -0.69214 |

23G

Filename: prod\_MeTMS\_axMe.out

B3LYP/6-31g\*: -329.29625442 Hartree

ZPE: 502.532 kJ/mol

DeltaG (excl. ZPE): -84.339 kJ/mol

Low frequencies: 83.20 188.88 218.56

Cartesian coordinates:

|   |          |          |          |
|---|----------|----------|----------|
| C | 0.24599  | 1.80262  | 1.26025  |
| C | -0.94321 | 2.03674  | 1.81729  |
| H | -1.11935 | 2.96125  | 2.36491  |
| H | 1.05388  | 2.52588  | 1.36035  |
| C | 0.57163  | 0.58087  | 0.42941  |
| H | 1.32637  | -0.01671 | 0.98821  |
| C | -2.06175 | 1.03445  | 1.72479  |
| H | -2.80468 | 1.35804  | 0.98097  |
| H | -2.59171 | 0.96053  | 2.68441  |
| C | -1.50361 | -0.33702 | 1.34069  |
| H | -0.97502 | -0.77443 | 2.21238  |
| H | -2.32295 | -1.02026 | 1.08835  |
| N | -0.62738 | -0.23516 | 0.17144  |
| C | 1.22198  | 1.03404  | -0.89118 |
| H | 2.09348  | 1.66610  | -0.68575 |
| H | 1.56627  | 0.18856  | -1.49445 |
| H | 0.50210  | 1.61129  | -1.48026 |
| C | -0.29803 | -1.55756 | -0.34565 |
| H | -1.22369 | -2.10350 | -0.55781 |
| H | 0.26005  | -1.47934 | -1.28251 |
| H | 0.30311  | -2.16457 | 0.36094  |

23H

Filename: prod\_MeTMS\_MeMe.out

B3LYP/6-31g\*: -368.60742804 Hartree

ZPE: 575.999 kJ/mol

DeltaG (excl. ZPE): -87.322 kJ/mol

Low frequencies: 94.59 176.25 215.85

Cartesian coordinates:

|   |          |          |          |
|---|----------|----------|----------|
| C | -1.06955 | 0.24075  | 0.33007  |
| C | -1.50270 | 0.51463  | 1.56138  |
| H | -2.25546 | -0.12016 | 2.02669  |
| H | -1.48191 | -0.60496 | -0.21907 |
| C | 0.00833  | 1.01380  | -0.41010 |
| C | -0.98020 | 1.68956  | 2.34063  |
| H | -1.79848 | 2.19112  | 2.87569  |
| H | -0.26793 | 1.34923  | 3.10681  |

|   |          |          |          |
|---|----------|----------|----------|
| C | -0.29626 | 2.68022  | 1.39764  |
| H | 0.27194  | 3.41776  | 1.97655  |
| H | -1.06752 | 3.24531  | 0.83720  |
| N | 0.64371  | 1.99125  | 0.51341  |
| C | -0.63137 | 1.67070  | -1.66257 |
| H | -1.35179 | 2.44517  | -1.37827 |
| H | 0.12861  | 2.12423  | -2.30841 |
| H | -1.16718 | 0.92199  | -2.25721 |
| C | 1.07613  | -0.01041 | -0.85739 |
| H | 0.61624  | -0.80081 | -1.46171 |
| H | 1.85618  | 0.45440  | -1.46981 |
| H | 1.54624  | -0.46618 | 0.01891  |
| C | 1.56224  | 2.93263  | -0.11548 |
| H | 1.06829  | 3.70317  | -0.73627 |
| H | 2.12611  | 3.45155  | 0.66826  |
| H | 2.28464  | 2.40543  | -0.74429 |

24A

Filename: reac\_minTMS\_E.out

B3LYP/6-31g\*: -659.70083622 Hartree

ZPE: 650.060 kJ/mol

DeltaG (excl. ZPE): -109.686 kJ/mol

Low frequencies: 27.75 50.74 89.12

Cartesian coordinates:

|    |          |          |          |
|----|----------|----------|----------|
| C  | -0.98005 | -0.24072 | 0.46558  |
| H  | -1.98603 | -0.49823 | 0.12580  |
| H  | -0.95716 | -0.24900 | 1.56162  |
| C  | -0.47561 | 1.11199  | -0.08200 |
| H  | -1.14800 | 1.88227  | 0.31380  |
| H  | -0.57055 | 1.12099  | -1.17376 |
| C  | 0.95652  | 1.36120  | 0.33616  |
| C  | 2.02361  | 1.23011  | -0.47449 |
| H  | 1.09839  | 1.63721  | 1.38280  |
| N  | -0.05145 | -1.30654 | 0.02062  |
| C  | -0.33727 | -2.49052 | -0.36147 |
| H  | -1.37249 | -2.82334 | -0.37010 |
| H  | 0.45777  | -3.16157 | -0.67617 |
| H  | 0.93081  | -0.98388 | 0.01360  |
| Si | 3.84711  | 1.51633  | 0.00259  |
| C  | 4.74581  | -0.13425 | -0.22222 |
| H  | 4.36735  | -0.90566 | 0.46034  |
| H  | 4.65819  | -0.51311 | -1.24766 |
| H  | 5.81565  | -0.01625 | -0.01239 |
| C  | 3.92597  | 2.08364  | 1.79893  |
| H  | 3.51816  | 1.33774  | 2.49196  |
| H  | 4.96747  | 2.25918  | 2.09303  |
| H  | 3.38379  | 3.02360  | 1.95541  |
| C  | 4.54073  | 2.81367  | -1.17455 |
| H  | 5.60130  | 2.99656  | -0.96501 |
| H  | 4.46317  | 2.49432  | -2.22056 |
| H  | 4.01391  | 3.76970  | -1.07623 |
| H  | 1.81215  | 0.98206  | -1.52248 |

24B

Filename: reac\_minTMS\_E\_eqMe\_f.out

B3LYP/6-31g\*: -699.03399833 Hartree

ZPE: 722.711 kJ/mol

DeltaG (excl. ZPE): -114.412 kJ/mol

Low frequencies: -193.12 24.66 38.88

Cartesian coordinates:

|   |          |          |         |
|---|----------|----------|---------|
| C | -0.95803 | -0.25189 | 0.45637 |
| H | -1.97039 | -0.49470 | 0.12411 |

|    |          |          |          |
|----|----------|----------|----------|
| H  | -0.93690 | -0.23648 | 1.55201  |
| C  | -0.44271 | 1.08274  | -0.11796 |
| H  | -1.11655 | 1.86682  | 0.24834  |
| H  | -0.52327 | 1.06489  | -1.21099 |
| C  | 0.98355  | 1.34484  | 0.31095  |
| C  | 2.05912  | 1.23481  | -0.48980 |
| H  | 1.11270  | 1.61878  | 1.35999  |
| N  | -0.05514 | -1.34489 | 0.02426  |
| C  | -0.38175 | -2.53189 | -0.34561 |
| H  | -1.44646 | -2.76429 | -0.32904 |
| H  | 0.93505  | -1.05828 | 0.01469  |
| Si | 3.86870  | 1.55932  | 0.00509  |
| C  | 4.82143  | -0.05686 | -0.24723 |
| H  | 4.46027  | -0.85488 | 0.41353  |
| H  | 4.75331  | -0.41385 | -1.28207 |
| H  | 5.88549  | 0.08829  | -0.02535 |
| C  | 3.92459  | 2.09013  | 1.81423  |
| H  | 3.53299  | 1.31918  | 2.48893  |
| H  | 4.95973  | 2.28672  | 2.11749  |
| H  | 3.35661  | 3.01165  | 1.98744  |
| C  | 4.53806  | 2.90234  | -1.13555 |
| H  | 5.59157  | 3.10880  | -0.91196 |
| H  | 4.47815  | 2.60594  | -2.18945 |
| H  | 3.98489  | 3.84132  | -1.02012 |
| H  | 1.86191  | 0.98554  | -1.54005 |
| C  | 0.60450  | -3.56240 | -0.77656 |
| H  | 0.09895  | -4.48974 | -1.04859 |
| H  | 1.17966  | -3.20771 | -1.64118 |
| H  | 1.31783  | -3.77328 | 0.03030  |

24C

Filename: reac\_minTMS\_E\_axMe\_f.out

B3LYP/6-31g\*: -699.03483790 Hartree

ZPE: 724.016 kJ/mol

DeltaG (excl. ZPE): -116.392 kJ/mol

Low frequencies: 26.21 36.95 64.24

Cartesian coordinates:

|    |          |          |          |
|----|----------|----------|----------|
| C  | -0.41799 | -0.95681 | 0.17364  |
| H  | -1.02556 | -1.78231 | 0.56146  |
| H  | -0.23764 | -0.24123 | 0.97734  |
| C  | -1.09613 | -0.29442 | -1.04591 |
| H  | -0.52451 | 0.59411  | -1.33785 |
| H  | -2.08409 | 0.04547  | -0.71348 |
| C  | -1.20512 | -1.25974 | -2.20355 |
| C  | -0.42059 | -1.23095 | -3.29732 |
| H  | -1.95612 | -2.04447 | -2.09337 |
| N  | 0.87654  | -1.53363 | -0.26258 |
| C  | 1.95872  | -1.73323 | 0.40550  |
| H  | 0.85133  | -1.80547 | -1.25707 |
| Si | -0.47494 | -2.44974 | -4.75974 |
| C  | 1.18351  | -3.36312 | -4.77536 |
| H  | 2.02981  | -2.67071 | -4.86155 |
| H  | 1.32759  | -3.96720 | -3.87069 |
| H  | 1.23744  | -4.04676 | -5.63100 |
| C  | -0.68837 | -1.44218 | -6.33751 |
| H  | 0.12459  | -0.71807 | -6.46778 |
| H  | -0.68841 | -2.09730 | -7.21683 |
| H  | -1.63361 | -0.88771 | -6.33750 |
| C  | -1.89979 | -3.65733 | -4.49930 |
| H  | -1.95006 | -4.36724 | -5.33330 |
| H  | -1.78518 | -4.24737 | -3.58186 |
| H  | -2.86676 | -3.14311 | -4.45251 |
| H  | 0.29524  | -0.40163 | -3.36148 |

|   |         |          |          |
|---|---------|----------|----------|
| H | 2.78477 | -2.16515 | -0.15948 |
| C | 2.17203 | -1.43966 | 1.83989  |
| H | 2.48064 | -2.36673 | 2.34250  |
| H | 3.01990 | -0.74814 | 1.93873  |
| H | 1.29927 | -1.02829 | 2.34652  |

24D

Filename: reac\_minTMS\_E\_MeMe\_f.out

B3LYP/6-31g\*: -738.36572926 Hartree

ZPE: 796.868 kJ/mol

DeltaG (excl. ZPE): -122.114 kJ/mol

Low frequencies: 24.92 32.49 53.01

Cartesian coordinates:

|    |          |          |          |
|----|----------|----------|----------|
| C  | -0.83410 | -0.43279 | 0.80596  |
| H  | -1.90920 | -0.62301 | 0.83047  |
| H  | -0.48508 | -0.26436 | 1.83173  |
| C  | -0.49102 | 0.76990  | -0.09999 |
| H  | -0.94509 | 1.65581  | 0.35968  |
| H  | -0.96452 | 0.62880  | -1.07851 |
| C  | 1.00277  | 0.93648  | -0.25652 |
| C  | 1.69388  | 0.61046  | -1.36438 |
| H  | 1.52905  | 1.31459  | 0.62220  |
| N  | -0.14340 | -1.63416 | 0.29000  |
| C  | -0.47375 | -2.87990 | 0.41834  |
| H  | 0.71895  | -1.39861 | -0.21895 |
| Si | 3.57685  | 0.73804  | -1.60216 |
| C  | 4.21754  | -1.02742 | -1.85281 |
| H  | 4.05382  | -1.65191 | -0.96510 |
| H  | 3.73730  | -1.51735 | -2.70879 |
| H  | 5.29665  | -1.02246 | -2.04789 |
| C  | 4.34342  | 1.51199  | -0.06223 |
| H  | 4.16205  | 0.91425  | 0.83932  |
| H  | 5.43039  | 1.59370  | -0.18083 |
| H  | 3.96076  | 2.52289  | 0.12030  |
| C  | 3.89875  | 1.77641  | -3.14154 |
| H  | 4.97403  | 1.84545  | -3.34464 |
| H  | 3.42425  | 1.34076  | -4.02888 |
| H  | 3.51709  | 2.79713  | -3.02546 |
| H  | 1.10285  | 0.26002  | -2.21990 |
| C  | 0.38625  | -3.93295 | -0.19599 |
| H  | 0.74056  | -4.61280 | 0.58926  |
| H  | -0.21788 | -4.53985 | -0.88238 |
| H  | 1.24476  | -3.52425 | -0.73456 |
| C  | -1.70662 | -3.27469 | 1.16994  |
| H  | -1.76770 | -4.35898 | 1.27352  |
| H  | -1.72483 | -2.81800 | 2.16580  |
| H  | -2.60129 | -2.92930 | 0.63492  |

24E

Filename: reac\_minMeTMS\_E.out

B3LYP/6-31g\*: -699.01941621 Hartree

ZPE: 724.359 kJ/mol

DeltaG (excl. ZPE): -114.618 kJ/mol

Low frequencies: 25.17 41.70 66.56

Cartesian coordinates:

|   |          |         |          |
|---|----------|---------|----------|
| C | 0.21528  | 0.25815 | 1.32412  |
| H | -0.01218 | 0.64973 | 2.31838  |
| H | 1.29141  | 0.33085 | 1.15507  |
| C | -0.58556 | 1.02028 | 0.22830  |
| H | -0.34378 | 0.60047 | -0.75508 |
| H | -0.20242 | 2.04826 | 0.24382  |
| C | -2.06827 | 0.99024 | 0.47657  |

|    |          |          |          |
|----|----------|----------|----------|
| C  | -2.94329 | 0.20383  | -0.18121 |
| H  | -2.42585 | 1.65800  | 1.26316  |
| N  | -0.14828 | -1.17812 | 1.30142  |
| C  | -1.22445 | -1.58487 | 1.87603  |
| H  | -1.78535 | -0.90882 | 2.50928  |
| H  | -1.54965 | -2.61387 | 1.75705  |
| C  | 0.67259  | -2.06351 | 0.45096  |
| H  | 0.22089  | -3.05446 | 0.40237  |
| H  | 0.73689  | -1.63142 | -0.55083 |
| H  | 1.67446  | -2.12902 | 0.88292  |
| Si | -4.83092 | 0.15596  | 0.06998  |
| C  | -5.28026 | -1.57853 | 0.68145  |
| H  | -4.94509 | -2.35786 | -0.01365 |
| H  | -4.85154 | -1.79308 | 1.66859  |
| H  | -6.36823 | -1.67775 | 0.77659  |
| C  | -5.62907 | 0.48856  | -1.60442 |
| H  | -5.32893 | -0.25637 | -2.35097 |
| H  | -6.72203 | 0.45072  | -1.52440 |
| H  | -5.35948 | 1.47784  | -1.99104 |
| C  | -5.31279 | 1.45800  | 1.34650  |
| H  | -6.39916 | 1.45591  | 1.49457  |
| H  | -4.85597 | 1.27654  | 2.32710  |
| H  | -5.03236 | 2.46763  | 1.02448  |
| H  | -2.52842 | -0.42445 | -0.97859 |

24F

Filename: reac\_minMeTMS\_E\_eqMe\_f.out

B3LYP/6-31g\*: -738.34606385 Hartree

ZPE: 797.433 kJ/mol

DeltaG (excl. ZPE): -122.877 kJ/mol

Low frequencies: 22.05 29.15 56.05

Cartesian coordinates:

|    |          |          |          |
|----|----------|----------|----------|
| C  | -0.82329 | -0.36011 | 0.61186  |
| H  | -1.88114 | -0.48890 | 0.37015  |
| H  | -0.73274 | -0.23759 | 1.69442  |
| C  | -0.23780 | 0.85240  | -0.14271 |
| H  | -0.93292 | 1.67825  | 0.06707  |
| H  | -0.29039 | 0.66298  | -1.22226 |
| C  | 1.16135  | 1.25245  | 0.25899  |
| C  | 2.22567  | 1.26368  | -0.55927 |
| H  | 1.26638  | 1.58577  | 1.29420  |
| N  | -0.13771 | -1.64594 | 0.26969  |
| C  | -0.57973 | -2.38903 | -0.68852 |
| H  | -1.47939 | -2.02331 | -1.18112 |
| Si | 3.97874  | 1.84587  | -0.11434 |
| C  | 5.14830  | 0.37255  | -0.32315 |
| H  | 4.91102  | -0.44295 | 0.37118  |
| H  | 5.11554  | -0.03167 | -1.34207 |
| H  | 6.18410  | 0.67475  | -0.12691 |
| C  | 3.99279  | 2.45497  | 1.67270  |
| H  | 3.72459  | 1.66574  | 2.38571  |
| H  | 4.99568  | 2.80534  | 1.94405  |
| H  | 3.30456  | 3.29487  | 1.82370  |
| C  | 4.44621  | 3.22509  | -1.31294 |
| H  | 5.46563  | 3.57892  | -1.11770 |
| H  | 4.41114  | 2.88412  | -2.35450 |
| H  | 3.77326  | 4.08511  | -1.21996 |
| H  | 2.05146  | 0.93979  | -1.59219 |
| C  | 0.02429  | -3.66838 | -1.15660 |
| H  | -0.57303 | -4.08573 | -1.96846 |
| H  | 1.04702  | -3.51322 | -1.52227 |
| H  | 0.07021  | -4.40520 | -0.34493 |
| C  | 1.06617  | -1.96731 | 1.06169  |

|   |         |          |         |
|---|---------|----------|---------|
| H | 1.52590 | -2.88809 | 0.70915 |
| H | 1.76296 | -1.13142 | 0.96048 |
| H | 0.76956 | -2.07479 | 2.10860 |

24G

Filename: reac\_minMeTMS\_E\_axMe\_f.out

B3LYP/6-31g\*: -738.34690263 Hartree

ZPE: 798.437 kJ/mol

DeltaG (excl. ZPE): -120.646 kJ/mol

Low frequencies: 25.16 27.64 54.96

Cartesian coordinates:

|    |          |          |          |
|----|----------|----------|----------|
| C  | -1.24298 | -0.13841 | 1.10290  |
| H  | -1.94111 | -0.12777 | 1.94173  |
| H  | -1.46383 | 0.72732  | 0.47432  |
| C  | -1.35554 | -1.44911 | 0.29436  |
| H  | -2.41822 | -1.53053 | 0.02484  |
| H  | -1.12721 | -2.30180 | 0.94509  |
| C  | -0.49777 | -1.49570 | -0.94716 |
| C  | 0.50194  | -2.36638 | -1.15688 |
| H  | -0.75955 | -0.76883 | -1.71978 |
| N  | 0.13270  | 0.08768  | 1.64487  |
| C  | 0.56364  | -0.42869 | 2.74656  |
| C  | 1.01181  | 0.93477  | 0.80840  |
| H  | 1.07592  | 0.47731  | -0.18102 |
| H  | 0.56802  | 1.93064  | 0.73254  |
| H  | 2.00333  | 0.99889  | 1.25786  |
| Si | 1.57169  | -2.50253 | -2.72029 |
| C  | 1.05708  | -1.15777 | -3.94208 |
| H  | 0.00702  | -1.25547 | -4.24172 |
| H  | 1.20069  | -0.14809 | -3.53794 |
| H  | 1.66087  | -1.22671 | -4.85470 |
| C  | 1.31801  | -4.22255 | -3.45128 |
| H  | 0.27702  | -4.38173 | -3.75475 |
| H  | 1.94735  | -4.36209 | -4.33852 |
| H  | 1.58167  | -5.00970 | -2.73501 |
| C  | 3.37582  | -2.27239 | -2.19803 |
| H  | 4.04276  | -2.38724 | -3.06096 |
| H  | 3.55923  | -1.27685 | -1.77561 |
| H  | 3.68002  | -3.01593 | -1.45148 |
| H  | 0.69840  | -3.08637 | -0.35355 |
| C  | -0.18543 | -1.29941 | 3.68370  |
| H  | -1.19554 | -1.55244 | 3.36501  |
| H  | 0.38759  | -2.22403 | 3.83367  |
| H  | -0.22308 | -0.80592 | 4.66471  |
| H  | 1.59228  | -0.18604 | 3.00959  |

24H

Filename: reac\_minMeTMS\_E\_MeMe\_f.out

B3LYP/6-31g\*: -777.67086009 Hartree

ZPE: 872.188 kJ/mol

DeltaG (excl. ZPE): -125.827 kJ/mol

Low frequencies: 20.67 31.89 48.25

Cartesian coordinates:

|   |          |          |          |
|---|----------|----------|----------|
| C | -0.49616 | 0.05436  | 1.28625  |
| H | -0.76316 | 0.27795  | 2.32330  |
| H | 0.22143  | 0.80409  | 0.95704  |
| C | -1.75178 | 0.05161  | 0.38339  |
| H | -2.22259 | 1.03342  | 0.52399  |
| H | -2.46681 | -0.69477 | 0.74926  |
| C | -1.44313 | -0.19067 | -1.07431 |
| C | -1.68665 | -1.33683 | -1.72943 |
| H | -0.99363 | 0.65249  | -1.60387 |

|    |          |          |          |
|----|----------|----------|----------|
| N  | 0.17096  | -1.27722 | 1.30025  |
| C  | 1.26467  | -1.53449 | 0.64159  |
| C  | -0.55353 | -2.32531 | 2.06579  |
| H  | 0.10143  | -2.75391 | 2.82638  |
| H  | -1.40718 | -1.86179 | 2.55677  |
| H  | -0.91127 | -3.10609 | 1.39163  |
| Si | -1.32472 | -1.69323 | -3.55770 |
| C  | -0.68223 | -0.12308 | -4.38563 |
| H  | -1.41483 | 0.69089  | -4.33580 |
| H  | 0.25200  | 0.23675  | -3.93715 |
| H  | -0.47741 | -0.31076 | -5.44630 |
| C  | -2.91993 | -2.29390 | -4.36244 |
| H  | -3.70263 | -1.52770 | -4.32374 |
| H  | -2.75408 | -2.54558 | -5.41668 |
| H  | -3.30808 | -3.19231 | -3.86774 |
| C  | -0.00882 | -3.05639 | -3.62265 |
| H  | 0.19528  | -3.34726 | -4.66017 |
| H  | 0.94326  | -2.72559 | -3.18762 |
| H  | -0.33118 | -3.96009 | -3.09095 |
| H  | -2.16938 | -2.13545 | -1.15265 |
| C  | 1.86650  | -2.90222 | 0.60939  |
| H  | 1.86758  | -3.24645 | -0.43400 |
| H  | 2.91907  | -2.83526 | 0.91091  |
| H  | 1.36378  | -3.64680 | 1.22294  |
| C  | 1.99951  | -0.46590 | -0.11883 |
| H  | 2.85595  | -0.89955 | -0.63753 |
| H  | 1.35100  | 0.01201  | -0.85810 |
| H  | 2.37184  | 0.30928  | 0.56241  |

25A

Filename: TS\_TMS\_E\_f.out

B3LYP/6-31g\*: -659.69077574 Hartree

ZPE: 651.675 kJ/mol

DeltaG (excl. ZPE): -102.615 kJ/mol

Low frequencies: -223.44 32.12 94.33

Cartesian coordinates:

|    |          |          |          |
|----|----------|----------|----------|
| C  | 0.00000  | 0.00000  | 0.00000  |
| C  | 0.00000  | 0.00000  | 1.95891  |
| N  | 1.29366  | 0.00000  | 2.38280  |
| C  | 2.13798  | -1.08474 | 1.97006  |
| C  | 2.22778  | -1.04513 | 0.33889  |
| C  | 0.83571  | -1.11324 | -0.06028 |
| H  | 0.42573  | 0.98844  | -0.16458 |
| H  | -1.05009 | -0.09788 | -0.27112 |
| H  | -0.56147 | -0.90709 | 2.16408  |
| H  | -0.55597 | 0.91893  | 2.13080  |
| H  | 1.74809  | 0.90804  | 2.42716  |
| H  | 3.14159  | -0.96609 | 2.37945  |
| H  | 1.72126  | -2.03921 | 2.29822  |
| H  | 2.65161  | -0.05979 | 0.10509  |
| H  | 0.36225  | -2.09614 | -0.10220 |
| Si | 3.43610  | -2.43633 | -0.34692 |
| C  | 3.61816  | -2.11026 | -2.19001 |
| H  | 2.66358  | -2.19915 | -2.72157 |
| H  | 4.02558  | -1.11274 | -2.39142 |
| H  | 4.30808  | -2.83843 | -2.63341 |
| C  | 5.07330  | -2.22630 | 0.55915  |
| H  | 5.47409  | -1.21043 | 0.46051  |
| H  | 5.00902  | -2.46796 | 1.62641  |
| H  | 5.81703  | -2.90582 | 0.12506  |
| C  | 2.65353  | -4.11542 | 0.00079  |
| H  | 3.32543  | -4.90587 | -0.35594 |
| H  | 2.49068  | -4.29914 | 1.06950  |

H 1.69893 -4.25605 -0.52001

25B

Filename: TS\_TMS\_E\_eqMe\_f.out

B3LYP/6-31g\*: -699.00670504 Hartree

ZPE: 725.200 kJ/mol

DeltaG (excl. ZPE): -105.698 kJ/mol

Low frequencies: -234.96 44.52 82.44

Cartesian coordinates:

|    |          |          |          |
|----|----------|----------|----------|
| C  | 0.00000  | 0.00000  | 0.00000  |
| C  | 0.00000  | 0.00000  | 1.95817  |
| N  | 1.28954  | 0.00000  | 2.38820  |
| C  | 2.15740  | -1.09171 | 2.01217  |
| C  | 2.21765  | -1.06839 | 0.36318  |
| C  | 0.82362  | -1.12121 | -0.03362 |
| H  | 0.43734  | 0.98279  | -0.16718 |
| H  | -1.04968 | -0.08933 | -0.27522 |
| H  | -0.56777 | -0.90184 | 2.16867  |
| H  | -0.55307 | 0.92300  | 2.11779  |
| H  | 1.74717  | 0.90773  | 2.43005  |
| H  | 1.68658  | -2.03102 | 2.31401  |
| H  | 2.65066  | -0.08912 | 0.12039  |
| H  | 0.33566  | -2.09754 | -0.06909 |
| Si | 3.32060  | -2.48890 | -0.45067 |
| C  | 2.73671  | -2.65130 | -2.23481 |
| H  | 1.69736  | -2.99168 | -2.31118 |
| H  | 2.82329  | -1.70472 | -2.78112 |
| H  | 3.35612  | -3.38666 | -2.76258 |
| C  | 5.12034  | -1.93787 | -0.41716 |
| H  | 5.25294  | -0.96529 | -0.90577 |
| H  | 5.54807  | -1.87235 | 0.58787  |
| H  | 5.72252  | -2.66294 | -0.97890 |
| C  | 3.02330  | -4.08825 | 0.50326  |
| H  | 3.57774  | -4.90267 | 0.02088  |
| H  | 3.36537  | -4.04214 | 1.54342  |
| H  | 1.96749  | -4.38582 | 0.50697  |
| C  | 3.53231  | -0.94799 | 2.65685  |
| H  | 4.15894  | -1.81043 | 2.42607  |
| H  | 4.04914  | -0.04830 | 2.30405  |
| H  | 3.42724  | -0.88994 | 3.74438  |

25C

Filename: TS\_TMS\_E\_axMe\_f.out

B3LYP/6-31g\*: -699.00473873 Hartree

ZPE: 725.957 kJ/mol

DeltaG (excl. ZPE): -104.907 kJ/mol

Low frequencies: -245.62 52.43 93.79

Cartesian coordinates:

|   |          |          |          |
|---|----------|----------|----------|
| C | 0.00000  | 0.00000  | 0.00000  |
| C | 0.00000  | 0.00000  | 1.96312  |
| N | 1.29342  | 0.00000  | 2.38481  |
| C | 2.16768  | -1.08535 | 1.99900  |
| C | 2.24008  | -1.00024 | 0.34693  |
| C | 0.85740  | -1.09597 | -0.07411 |
| H | 0.40927  | 0.99814  | -0.14749 |
| H | -1.04623 | -0.11116 | -0.28079 |
| H | -0.57174 | -0.89898 | 2.16745  |
| H | -0.54824 | 0.92425  | 2.13024  |
| H | 1.74114  | 0.91181  | 2.41812  |
| H | 3.17300  | -0.84261 | 2.34923  |
| H | 2.61802  | 0.01418  | 0.16227  |
| H | 0.40785  | -2.08521 | -0.16583 |



|    |         |          |          |
|----|---------|----------|----------|
| Si | 3.52732 | -2.23662 | -0.47944 |
| C  | 3.95797 | -1.44878 | -2.13370 |
| H  | 3.08078 | -1.34899 | -2.78351 |
| H  | 4.40369 | -0.45454 | -2.01256 |
| H  | 4.68919 | -2.06963 | -2.66544 |
| C  | 5.04126 | -2.31781 | 0.63956  |
| H  | 5.47226 | -1.32604 | 0.82212  |
| H  | 4.84501 | -2.78859 | 1.60954  |
| H  | 5.81853 | -2.91574 | 0.14782  |
| C  | 2.72967 | -3.92658 | -0.72390 |
| H  | 3.46414 | -4.60279 | -1.17890 |
| H  | 2.39766 | -4.39794 | 0.20739  |
| H  | 1.87397 | -3.88421 | -1.40829 |
| C  | 1.74024 | -2.44066 | 2.55915  |
| H  | 2.47903 | -3.20195 | 2.29958  |
| H  | 1.68550 | -2.38270 | 3.65045  |
| H  | 0.77062 | -2.78007 | 2.18434  |

25D

Filename: TS\_TMS\_E\_MeMe\_f.out

B3LYP/6-31g\*: -738.31835009 Hartree

ZPE: 799.073 kJ/mol

DeltaG (excl. ZPE): -108.124 kJ/mol

Low frequencies: -253.67 31.88 83.78

Cartesian coordinates:

|    |          |          |          |
|----|----------|----------|----------|
| C  | 0.00000  | 0.00000  | 0.00000  |
| C  | 0.00000  | 0.00000  | 1.96414  |
| N  | 1.29058  | 0.00000  | 2.38413  |
| C  | 2.19465  | -1.08887 | 2.04574  |
| C  | 2.20759  | -1.08926 | 0.36988  |
| C  | 0.81180  | -1.12883 | -0.02788 |
| H  | 0.44625  | 0.98024  | -0.15788 |
| H  | -1.04953 | -0.07844 | -0.27918 |
| H  | -0.58055 | -0.89113 | 2.17737  |
| H  | -0.54215 | 0.93076  | 2.11532  |
| H  | 1.73885  | 0.91247  | 2.41126  |
| H  | 2.63351  | -0.10651 | 0.12911  |
| H  | 0.31570  | -2.09789 | -0.08586 |
| Si | 3.27106  | -2.44240 | -0.60652 |
| C  | 3.49677  | -1.67430 | -2.31225 |
| H  | 2.53945  | -1.47336 | -2.80724 |
| H  | 4.05598  | -0.73215 | -2.26692 |
| H  | 4.06243  | -2.35592 | -2.95886 |
| C  | 4.95555  | -2.76304 | 0.17480  |
| H  | 5.54119  | -1.84939 | 0.32263  |
| H  | 4.90494  | -3.30279 | 1.12661  |
| H  | 5.52321  | -3.39732 | -0.51847 |
| C  | 2.28610  | -4.04844 | -0.71656 |
| H  | 2.89470  | -4.79538 | -1.24129 |
| H  | 2.03393  | -4.47551 | 0.26043  |
| H  | 1.35877  | -3.93994 | -1.29102 |
| C  | 1.71773  | -2.42744 | 2.61911  |
| H  | 2.42933  | -3.21542 | 2.36048  |
| H  | 1.66677  | -2.36279 | 3.71053  |
| H  | 0.73615  | -2.73565 | 2.24834  |
| C  | 3.58392  | -0.72421 | 2.57800  |
| H  | 4.30812  | -1.50256 | 2.34304  |
| H  | 3.94654  | 0.21701  | 2.14807  |
| H  | 3.54350  | -0.61743 | 3.66694  |

25E

Filename: TS\_MeTMS\_E\_f.out

B3LYP/6-31g\*: -699.00364256 Hartree  
 ZPE: 724.652 kJ/mol  
 DeltaG (excl. ZPE): -107.907 kJ/mol  
 Low frequencies: -254.17 28.50 83.44

Cartesian coordinates:

|    |          |          |          |
|----|----------|----------|----------|
| C  | 0.00000  | 0.00000  | 0.00000  |
| C  | 0.00000  | 0.00000  | 1.91296  |
| N  | 1.30256  | 0.00000  | 2.32731  |
| C  | 2.06352  | -1.14874 | 1.94229  |
| C  | 2.17498  | -1.15801 | 0.29251  |
| C  | 0.78661  | -1.15055 | -0.11707 |
| H  | 0.46901  | 0.96901  | -0.16850 |
| H  | -1.05140 | -0.04490 | -0.28071 |
| H  | -0.55787 | -0.90577 | 2.13492  |
| H  | -0.55619 | 0.91460  | 2.10641  |
| H  | 3.07528  | -1.10045 | 2.34444  |
| H  | 1.57900  | -2.06904 | 2.27367  |
| H  | 2.65631  | -0.20024 | 0.05556  |
| H  | 0.26936  | -2.10754 | -0.20778 |
| C  | 2.01985  | 1.27907  | 2.44534  |
| H  | 1.34012  | 2.03991  | 2.83136  |
| H  | 2.84477  | 1.15975  | 3.15053  |
| H  | 2.42241  | 1.61161  | 1.47897  |
| Si | 3.31022  | -2.62737 | -0.33570 |
| C  | 3.66920  | -2.27764 | -2.14882 |
| H  | 2.75566  | -2.25286 | -2.75415 |
| H  | 4.19052  | -1.32296 | -2.28535 |
| H  | 4.31469  | -3.06207 | -2.56222 |
| C  | 4.88945  | -2.59276 | 0.69174  |
| H  | 5.38307  | -1.61388 | 0.66217  |
| H  | 4.72670  | -2.86372 | 1.74141  |
| H  | 5.60217  | -3.32033 | 0.28441  |
| C  | 2.36622  | -4.24199 | -0.09988 |
| H  | 3.00298  | -5.08106 | -0.40618 |
| H  | 2.08475  | -4.42451 | 0.94428  |
| H  | 1.45861  | -4.29570 | -0.71275 |

25F

Filename: TS\_MeTMS\_E\_eqMe\_f.out

B3LYP/6-31g\*: -738.31690995 Hartree  
 ZPE: 799.198 kJ/mol  
 DeltaG (excl. ZPE): -109.781 kJ/mol  
 Low frequencies: -277.12 45.28 71.06

Cartesian coordinates:

|    |          |          |          |
|----|----------|----------|----------|
| C  | 0.00000  | 0.00000  | 0.00000  |
| C  | 0.00000  | 0.00000  | 1.91538  |
| N  | 1.29974  | 0.00000  | 2.33086  |
| C  | 2.05394  | -1.18547 | 1.99216  |
| C  | 2.15276  | -1.20347 | 0.32114  |
| C  | 0.76545  | -1.16410 | -0.09310 |
| H  | 0.48797  | 0.95993  | -0.16527 |
| H  | -1.05011 | -0.02747 | -0.28731 |
| H  | -0.56356 | -0.90026 | 2.14482  |
| H  | -0.55371 | 0.91915  | 2.09247  |
| H  | 1.46154  | -2.05750 | 2.27889  |
| H  | 2.65637  | -0.25722 | 0.08337  |
| H  | 0.22685  | -2.10966 | -0.18440 |
| C  | 2.00808  | 1.28499  | 2.43508  |
| H  | 2.71043  | 1.25122  | 3.26976  |
| H  | 2.56159  | 1.52089  | 1.51681  |
| H  | 1.28268  | 2.07645  | 2.62727  |
| Si | 3.16732  | -2.70044 | -0.45146 |
| C  | 2.69585  | -2.75451 | -2.27560 |

|   |         |          |          |
|---|---------|----------|----------|
| H | 1.63169 | -2.96609 | -2.43253 |
| H | 2.93038 | -1.81207 | -2.78448 |
| H | 3.26127 | -3.54533 | -2.78340 |
| C | 5.01127 | -2.34972 | -0.29139 |
| H | 5.27474 | -1.37002 | -0.70763 |
| H | 5.38658 | -2.39353 | 0.73532  |
| H | 5.56348 | -3.10079 | -0.87004 |
| C | 2.64816 | -4.28842 | 0.42495  |
| H | 3.15696 | -5.14121 | -0.04102 |
| H | 2.91200 | -4.30248 | 1.48869  |
| H | 1.57143 | -4.48098 | 0.34184  |
| C | 3.42601 | -1.25588 | 2.65435  |
| H | 3.86077 | -2.24439 | 2.49904  |
| H | 4.12285 | -0.51268 | 2.25795  |
| H | 3.32412 | -1.10650 | 3.73424  |

25G

Filename: TS\_MeTMS\_E\_axMe\_f.out

B3LYP/6-31g\*: -738.31716589 Hartree

ZPE: 798.839 kJ/mol

DeltaG (excl. ZPE): -109.981 kJ/mol

Low frequencies: -278.87 50.70 82.36

Cartesian coordinates:

|    |          |          |          |
|----|----------|----------|----------|
| C  | 0.00000  | 0.00000  | 0.00000  |
| C  | 0.00000  | 0.00000  | 1.92226  |
| N  | 1.30151  | 0.00000  | 2.33411  |
| C  | 2.09572  | -1.14773 | 1.97059  |
| C  | 2.19392  | -1.10444 | 0.30062  |
| C  | 0.81333  | -1.12982 | -0.13144 |
| H  | 0.45004  | 0.98118  | -0.14878 |
| H  | -1.04828 | -0.06113 | -0.28901 |
| H  | -0.56780 | -0.89881 | 2.13713  |
| H  | -0.54993 | 0.91857  | 2.11243  |
| H  | 3.11646  | -0.97569 | 2.31675  |
| H  | 2.62620  | -0.11254 | 0.11334  |
| H  | 0.32523  | -2.09389 | -0.27766 |
| C  | 2.00372  | 1.28624  | 2.46417  |
| H  | 1.30550  | 2.04676  | 2.81643  |
| H  | 2.80467  | 1.18273  | 3.19903  |
| H  | 2.43765  | 1.61157  | 1.50886  |
| Si | 3.42669  | -2.41997 | -0.47060 |
| C  | 3.97385  | -1.67337 | -2.11044 |
| H  | 3.13094  | -1.51192 | -2.79242 |
| H  | 4.48614  | -0.71369 | -1.97390 |
| H  | 4.67725  | -2.34767 | -2.61387 |
| C  | 4.89876  | -2.59904 | 0.69437  |
| H  | 5.38881  | -1.63743 | 0.88957  |
| H  | 4.64487  | -3.05418 | 1.65841  |
| H  | 5.64940  | -3.24729 | 0.22563  |
| C  | 2.53313  | -4.05800 | -0.73853 |
| H  | 3.23968  | -4.78597 | -1.15610 |
| H  | 2.13128  | -4.49585 | 0.18175  |
| H  | 1.71153  | -3.96679 | -1.45902 |
| C  | 1.58104  | -2.47394 | 2.52914  |
| H  | 2.29372  | -3.27097 | 2.30616  |
| H  | 1.48792  | -2.40168 | 3.61726  |
| H  | 0.61327  | -2.77475 | 2.11923  |

25H

Filename: TS\_MeTMS\_E\_MeMe\_f.out

B3LYP/6-31g\*: -777.62578300 Hartree

ZPE: 873.665 kJ/mol

DeltaG (excl. ZPE): -112.559 kJ/mol

Low frequencies: -299.74 22.13 73.34

Cartesian coordinates:

|    |          |          |          |
|----|----------|----------|----------|
| C  | 0.00000  | 0.00000  | 0.00000  |
| C  | 0.00000  | 0.00000  | 1.93029  |
| N  | 1.30155  | 0.00000  | 2.33287  |
| C  | 2.09474  | -1.18798 | 2.02690  |
| C  | 2.14591  | -1.21447 | 0.33040  |
| C  | 0.75800  | -1.16692 | -0.08812 |
| H  | 0.49291  | 0.95977  | -0.15009 |
| H  | -1.04927 | -0.01999 | -0.29089 |
| H  | -0.58029 | -0.88653 | 2.15633  |
| H  | -0.54227 | 0.92720  | 2.09693  |
| H  | 2.63770  | -0.25969 | 0.10168  |
| H  | 0.21743  | -2.10572 | -0.20934 |
| C  | 1.97689  | 1.30671  | 2.42222  |
| H  | 1.22677  | 2.08180  | 2.58264  |
| H  | 2.66418  | 1.31442  | 3.26898  |
| H  | 2.53860  | 1.53814  | 1.50814  |
| Si | 3.14515  | -2.62943 | -0.61423 |
| C  | 3.43749  | -1.88630 | -2.32229 |
| H  | 2.50048  | -1.63211 | -2.83145 |
| H  | 4.05014  | -0.97796 | -2.27384 |
| H  | 3.97158  | -2.60307 | -2.95767 |
| C  | 4.80606  | -3.04751 | 0.17473  |
| H  | 5.42520  | -2.16615 | 0.37287  |
| H  | 4.72029  | -3.62654 | 1.10055  |
| H  | 5.35840  | -3.67278 | -0.53870 |
| C  | 2.07843  | -4.18234 | -0.73221 |
| H  | 2.65159  | -4.95994 | -1.25233 |
| H  | 1.79772  | -4.59466 | 0.24346  |
| H  | 1.16179  | -4.02772 | -1.31317 |
| C  | 1.45231  | -2.46961 | 2.57890  |
| H  | 2.10065  | -3.32210 | 2.36296  |
| H  | 1.34990  | -2.39197 | 3.66631  |
| H  | 0.47080  | -2.69562 | 2.15609  |
| C  | 3.51815  | -1.05223 | 2.57709  |
| H  | 4.06244  | -1.98252 | 2.42472  |
| H  | 4.08637  | -0.25032 | 2.09961  |
| H  | 3.48221  | -0.86370 | 3.65562  |

26A

Filename: int\_TMS\_E\_f.out

B3LYP/6-31g\*: -659.69739959 Hartree

ZPE: 648.482 kJ/mol

DeltaG (excl. ZPE): -108.148 kJ/mol

Low frequencies: 34.45 78.79 89.80

Cartesian coordinates:

|   |          |          |         |
|---|----------|----------|---------|
| C | -0.64572 | -3.01369 | 4.42434 |
| C | 0.54818  | 0.66100  | 2.02840 |
| N | 0.75955  | -0.47358 | 2.57420 |
| C | 1.53869  | -1.62491 | 2.03305 |
| C | 0.77248  | -2.92416 | 2.33037 |
| C | 0.54890  | -3.04923 | 3.81707 |
| H | -1.57353 | -2.91716 | 3.86121 |
| H | -0.74009 | -3.13557 | 5.49973 |
| H | 1.00415  | 0.89181  | 1.06783 |
| H | -0.08588 | 1.39159  | 2.52467 |
| H | 0.31156  | -0.69761 | 3.47625 |
| H | 1.69927  | -1.44043 | 0.96858 |
| H | 2.50565  | -1.60540 | 2.55003 |
| H | -0.20001 | -2.87214 | 1.81894 |
| H | 1.44498  | -3.17485 | 4.42784 |

|    |          |          |          |
|----|----------|----------|----------|
| Si | 1.67496  | -4.49262 | 1.58162  |
| C  | 0.51582  | -5.94710 | 1.86249  |
| H  | 0.31198  | -6.10884 | 2.92729  |
| H  | -0.44542 | -5.80257 | 1.35539  |
| H  | 0.95986  | -6.86761 | 1.46752  |
| C  | 1.94108  | -4.16726 | -0.25948 |
| H  | 1.00183  | -3.94133 | -0.77896 |
| H  | 2.64438  | -3.34792 | -0.45300 |
| H  | 2.36285  | -5.06150 | -0.73536 |
| C  | 3.32421  | -4.71671 | 2.47066  |
| H  | 3.83490  | -5.60491 | 2.07809  |
| H  | 4.00588  | -3.87023 | 2.32405  |
| H  | 3.20142  | -4.87104 | 3.54896  |

26B

Filename: int\_TMS\_E\_eqMe\_f.out

B3LYP/6-31g\*: -699.01263830 Hartree

ZPE: 723.016 kJ/mol

DeltaG (excl. ZPE): -110.426 kJ/mol

Low frequencies: 42.60 58.32 106.06

Cartesian coordinates:

|    |          |          |          |
|----|----------|----------|----------|
| C  | -0.91195 | -3.05557 | 4.08892  |
| C  | 0.52118  | 0.69298  | 2.26707  |
| N  | 0.74127  | -0.49035 | 2.69287  |
| C  | 1.61627  | -1.57501 | 2.11693  |
| C  | 0.77995  | -2.87893 | 2.20727  |
| C  | 0.35018  | -3.09397 | 3.63952  |
| H  | -1.75393 | -2.88230 | 3.42031  |
| H  | -1.15016 | -3.25017 | 5.13089  |
| H  | 1.04216  | 1.06714  | 1.39149  |
| H  | -0.19280 | 1.32578  | 2.78795  |
| H  | 0.21323  | -0.83388 | 3.51025  |
| H  | 2.44855  | -1.64117 | 2.83047  |
| H  | -0.11329 | -2.75150 | 1.57746  |
| H  | 1.15142  | -3.29683 | 4.35399  |
| Si | 1.68059  | -4.49981 | 1.54692  |
| C  | 0.70495  | -5.95842 | 2.22747  |
| H  | 0.75319  | -6.02313 | 3.31938  |
| H  | -0.35256 | -5.90930 | 1.94301  |
| H  | 1.11009  | -6.89334 | 1.82181  |
| C  | 1.62410  | -4.53962 | -0.33966 |
| H  | 0.59854  | -4.43408 | -0.71341 |
| H  | 2.24008  | -3.77722 | -0.82733 |
| H  | 1.99055  | -5.51465 | -0.68419 |
| C  | 3.45438  | -4.50770 | 2.19777  |
| H  | 3.94767  | -5.44158 | 1.90191  |
| H  | 4.06795  | -3.68825 | 1.80418  |
| H  | 3.49385  | -4.46238 | 3.29293  |
| C  | 2.14397  | -1.18067 | 0.74504  |
| H  | 2.83322  | -1.95188 | 0.39808  |
| H  | 1.33771  | -1.09529 | 0.00811  |
| H  | 2.71204  | -0.24432 | 0.77361  |

26C

Filename: int\_TMS\_E\_axMe\_f.out

B3LYP/6-31g\*: -699.01328886 Hartree

ZPE: 722.849 kJ/mol

DeltaG (excl. ZPE): -111.265 kJ/mol

Low frequencies: 43.64 62.30 86.91

Cartesian coordinates:

|   |         |          |         |
|---|---------|----------|---------|
| C | 5.08785 | -1.08810 | 2.58759 |
| C | 0.91671 | 0.08034  | 3.84002 |

|    |          |          |          |
|----|----------|----------|----------|
| N  | 1.77666  | -0.26164 | 2.96095  |
| C  | 1.61873  | -1.26223 | 1.84863  |
| C  | 2.90017  | -2.12947 | 1.87275  |
| C  | 4.13937  | -1.29473 | 1.66294  |
| H  | 5.03243  | -1.53827 | 3.57781  |
| H  | 5.97794  | -0.50478 | 2.36876  |
| H  | -0.08195 | -0.34949 | 3.81194  |
| H  | 1.18292  | 0.79536  | 4.61447  |
| H  | 2.72838  | 0.13132  | 3.00021  |
| H  | 2.95301  | -2.57701 | 2.87705  |
| H  | 4.26933  | -0.84646 | 0.67801  |
| Si | 2.86071  | -3.69686 | 0.69139  |
| C  | 4.08047  | -4.90970 | 1.45439  |
| H  | 5.07933  | -4.46990 | 1.55343  |
| H  | 3.75830  | -5.24282 | 2.44808  |
| H  | 4.17564  | -5.80231 | 0.82488  |
| C  | 1.10623  | -4.40018 | 0.70652  |
| H  | 0.76361  | -4.63840 | 1.72103  |
| H  | 0.36866  | -3.73250 | 0.24479  |
| H  | 1.08401  | -5.33682 | 0.13621  |
| C  | 3.39045  | -3.22513 | -1.05653 |
| H  | 3.39944  | -4.12415 | -1.68498 |
| H  | 2.72156  | -2.50446 | -1.54049 |
| H  | 4.40468  | -2.81033 | -1.07701 |
| C  | 1.33524  | -0.48693 | 0.55614  |
| H  | 1.20063  | -1.19745 | -0.26313 |
| H  | 0.41882  | 0.10436  | 0.64648  |
| H  | 2.15710  | 0.18407  | 0.29064  |
| H  | 0.74752  | -1.86574 | 2.12005  |

26D

Filename: int\_TMS\_E\_MeMe\_f.out

B3LYP/6-31g\*: -738.32491929 Hartree

ZPE: 796.751 kJ/mol

DeltaG (excl. ZPE): -113.778 kJ/mol

Low frequencies: 17.54 72.60 107.96

Cartesian coordinates:

|    |         |          |          |
|----|---------|----------|----------|
| C  | 4.05138 | 0.22033  | 3.73591  |
| C  | 1.14406 | 0.64154  | 2.86684  |
| N  | 0.94110 | -0.62794 | 2.92426  |
| C  | 1.60275 | -1.68894 | 2.07638  |
| C  | 3.01250 | -1.86348 | 2.76477  |
| C  | 3.81008 | -0.59674 | 2.69606  |
| H  | 3.70211 | -0.01286 | 4.74051  |
| H  | 4.66495 | 1.11109  | 3.63059  |
| H  | 1.63736 | 1.07512  | 2.00754  |
| H  | 0.75502 | 1.28515  | 3.65019  |
| H  | 0.45699 | -0.98957 | 3.74725  |
| H  | 2.80878 | -2.08546 | 3.82446  |
| H  | 4.22149 | -0.32320 | 1.72382  |
| Si | 4.16953 | -3.37843 | 2.23449  |
| C  | 5.72538 | -3.15194 | 3.27302  |
| H  | 6.27691 | -2.24316 | 3.01136  |
| H  | 5.49751 | -3.10688 | 4.34472  |
| H  | 6.39732 | -4.00483 | 3.11879  |
| C  | 3.36946 | -5.02779 | 2.69020  |
| H  | 2.96475 | -5.02977 | 3.70911  |
| H  | 2.57319 | -5.34093 | 2.00745  |
| H  | 4.14347 | -5.80469 | 2.65387  |
| C  | 4.58349 | -3.31698 | 0.39364  |
| H  | 5.38356 | -4.03991 | 0.19078  |
| H  | 3.73932 | -3.59220 | -0.24874 |
| H  | 4.95206 | -2.33624 | 0.07151  |

|   |          |          |         |
|---|----------|----------|---------|
| C | 0.70825  | -2.92751 | 2.20532 |
| H | 1.09304  | -3.73096 | 1.57635 |
| H | 0.67584  | -3.30128 | 3.23555 |
| H | -0.31208 | -2.70623 | 1.87438 |
| C | 1.66011  | -1.21652 | 0.61945 |
| H | 2.08302  | -2.01465 | 0.00633 |
| H | 0.65456  | -1.00049 | 0.24427 |
| H | 2.28802  | -0.33420 | 0.47147 |

26E

Filename: int\_MeTMS\_E\_f.out

B3LYP/6-31g\*: -699.01606534 Hartree

ZPE: 722.928 kJ/mol

DeltaG (excl. ZPE): -112.681 kJ/mol

Low frequencies: 31.64 62.50 83.05

Cartesian coordinates:

|    |          |          |          |
|----|----------|----------|----------|
| C  | 0.00000  | 0.00000  | 0.00000  |
| C  | 0.00000  | 0.00000  | 3.34733  |
| N  | 1.28491  | 0.00000  | 3.31292  |
| C  | 2.03330  | -1.12242 | 2.67391  |
| C  | 2.04951  | -0.93472 | 1.13910  |
| C  | 0.66160  | -1.01257 | 0.57986  |
| H  | 0.44927  | 0.98419  | -0.11982 |
| H  | -0.99354 | -0.13446 | -0.41878 |
| H  | -0.54620 | -0.88821 | 3.05380  |
| H  | -0.53623 | 0.87620  | 3.69887  |
| H  | 3.03670  | -1.11703 | 3.10326  |
| H  | 1.53466  | -2.05272 | 2.95881  |
| H  | 2.47796  | 0.05372  | 0.91602  |
| H  | 0.16723  | -1.98393 | 0.65300  |
| C  | 2.07888  | 1.17169  | 3.73235  |
| H  | 1.41620  | 1.98453  | 4.03012  |
| H  | 2.71273  | 0.87746  | 4.57307  |
| H  | 2.70851  | 1.48864  | 2.89776  |
| Si | 3.26393  | -2.21410 | 0.27992  |
| C  | 3.32785  | -1.73871 | -1.53795 |
| H  | 2.34051  | -1.79590 | -2.00890 |
| H  | 3.70816  | -0.71989 | -1.67771 |
| H  | 3.99592  | -2.41487 | -2.08443 |
| C  | 4.95536  | -2.02060 | 1.09733  |
| H  | 5.31876  | -0.98659 | 1.05578  |
| H  | 4.96801  | -2.34592 | 2.14466  |
| H  | 5.69085  | -2.63827 | 0.56771  |
| C  | 2.58632  | -3.95656 | 0.53181  |
| H  | 3.25616  | -4.68426 | 0.05781  |
| H  | 2.51312  | -4.23626 | 1.59002  |
| H  | 1.59812  | -4.08854 | 0.07626  |

26F

Filename: int\_MeTMS\_E\_eqMe\_f.out

B3LYP/6-31g\*: -738.32655655 Hartree

ZPE: 796.759 kJ/mol

DeltaG (excl. ZPE): -115.914 kJ/mol

Low frequencies: 28.00 54.17 79.40

Cartesian coordinates:

|   |         |          |         |
|---|---------|----------|---------|
| C | 4.22233 | 0.24114  | 3.75134 |
| C | 0.89117 | -0.03138 | 4.04765 |
| N | 0.71314 | -0.55445 | 2.89349 |
| C | 1.49941 | -1.77922 | 2.42182 |
| C | 2.94154 | -1.79333 | 2.96035 |
| C | 3.61326 | -0.45782 | 2.78648 |
| H | 4.27973 | -0.12162 | 4.77672 |

|    |          |          |          |
|----|----------|----------|----------|
| H  | 4.72560  | 1.18042  | 3.54190  |
| H  | 1.60251  | -0.47119 | 4.73482  |
| H  | 0.31906  | 0.84323  | 4.34342  |
| H  | 1.51697  | -1.64521 | 1.33527  |
| H  | 2.93214  | -2.06506 | 4.02708  |
| H  | 3.60934  | -0.05094 | 1.77245  |
| Si | 4.05958  | -3.18996 | 2.11521  |
| C  | 5.85510  | -2.72244 | 2.42594  |
| H  | 6.14029  | -1.79263 | 1.92414  |
| H  | 6.06396  | -2.59991 | 3.49505  |
| H  | 6.51018  | -3.51899 | 2.05274  |
| C  | 3.71635  | -4.86246 | 2.92331  |
| H  | 3.82843  | -4.81499 | 4.01320  |
| H  | 2.72752  | -5.27847 | 2.70521  |
| H  | 4.45494  | -5.58683 | 2.55785  |
| C  | 3.67698  | -3.22042 | 0.26479  |
| H  | 4.34765  | -3.92967 | -0.23515 |
| H  | 2.65292  | -3.54194 | 0.03879  |
| H  | 3.83907  | -2.24392 | -0.20787 |
| C  | 0.66072  | -3.01503 | 2.77105  |
| H  | 1.07304  | -3.89007 | 2.26583  |
| H  | 0.67264  | -3.20507 | 3.84917  |
| H  | -0.37931 | -2.90833 | 2.44682  |
| C  | -0.22708 | 0.02707  | 1.91587  |
| H  | 0.34999  | 0.44461  | 1.08615  |
| H  | -0.87891 | -0.76427 | 1.53920  |
| H  | -0.82445 | 0.80766  | 2.38796  |

26G

Filename: int\_MeTMS\_E\_axMe\_f.out

B3LYP/6-31g\*: -738.33000711 Hartree

ZPE: 797.496 kJ/mol

DeltaG (excl. ZPE): -114.816 kJ/mol

Low frequencies: 42.79 61.00 77.45

Cartesian coordinates:

|    |          |          |          |
|----|----------|----------|----------|
| C  | 0.83652  | 1.64331  | -0.17931 |
| C  | 0.25483  | 0.13403  | 2.70233  |
| N  | 1.49865  | -0.17817 | 2.78015  |
| C  | 2.17243  | -1.04733 | 1.74130  |
| C  | 2.47929  | -0.13454 | 0.51630  |
| C  | 1.23732  | 0.36264  | -0.15915 |
| H  | 1.41220  | 2.43178  | 0.30247  |
| H  | -0.05256 | 1.95390  | -0.72132 |
| H  | -0.38038 | -0.34158 | 1.96745  |
| H  | -0.16820 | 0.85474  | 3.39562  |
| H  | 3.03152  | 0.73564  | 0.90300  |
| H  | 0.63400  | -0.37526 | -0.68875 |
| Si | 3.74665  | -0.91190 | -0.76766 |
| C  | 4.50936  | 0.56350  | -1.65325 |
| H  | 3.74529  | 1.18304  | -2.13621 |
| H  | 5.07803  | 1.20295  | -0.96765 |
| H  | 5.20087  | 0.22532  | -2.43394 |
| C  | 5.05510  | -1.86411 | 0.20899  |
| H  | 5.55062  | -1.23725 | 0.96065  |
| H  | 4.65628  | -2.75191 | 0.71460  |
| H  | 5.83674  | -2.21562 | -0.47548 |
| C  | 2.85475  | -2.03893 | -1.98908 |
| H  | 3.58069  | -2.43624 | -2.70908 |
| H  | 2.36856  | -2.90045 | -1.51760 |
| H  | 2.09635  | -1.49677 | -2.56533 |
| C  | 1.35709  | -2.31030 | 1.46208  |
| H  | 1.96004  | -2.98864 | 0.85342  |
| H  | 1.10689  | -2.83023 | 2.39220  |



|   |         |          |         |
|---|---------|----------|---------|
| H | 0.43446 | -2.11380 | 0.90920 |
| H | 3.11509 | -1.33619 | 2.21207 |
| C | 2.38287 | 0.42576  | 3.79576 |
| H | 2.77136 | -0.37125 | 4.43539 |
| H | 3.21544 | 0.92141  | 3.29100 |
| H | 1.82747 | 1.14808  | 4.39478 |

26H

Filename: int\_MeTMS\_E\_MeMe\_f.out

B3LYP/6-31g\*: -777.63322162 Hartree

ZPE: 872.029 kJ/mol

DeltaG (excl. ZPE): -116.334 kJ/mol

Low frequencies: 38.76 53.15 66.31

Cartesian coordinates:

|    |          |          |          |
|----|----------|----------|----------|
| C  | 5.09025  | -1.60324 | 2.70887  |
| C  | 1.71125  | -0.22720 | 4.10347  |
| N  | 1.91130  | -0.03072 | 2.85541  |
| C  | 1.59405  | -1.15191 | 1.79730  |
| C  | 2.76968  | -2.17064 | 1.88622  |
| C  | 4.13533  | -1.53845 | 1.77397  |
| H  | 4.93314  | -2.11568 | 3.65652  |
| H  | 6.07562  | -1.17545 | 2.54667  |
| H  | 1.26547  | -1.15306 | 4.44713  |
| H  | 1.98801  | 0.53280  | 4.82822  |
| H  | 2.69797  | -2.63368 | 2.88212  |
| H  | 4.36763  | -1.04119 | 0.83149  |
| Si | 2.78409  | -3.72489 | 0.66090  |
| C  | 3.83487  | -4.99935 | 1.56695  |
| H  | 4.82625  | -4.60980 | 1.82042  |
| H  | 3.35557  | -5.33873 | 2.49317  |
| H  | 3.97886  | -5.88243 | 0.93302  |
| C  | 1.07495  | -4.46442 | 0.32592  |
| H  | 0.53361  | -4.73486 | 1.23913  |
| H  | 0.42697  | -3.82521 | -0.28504 |
| H  | 1.22326  | -5.39174 | -0.24233 |
| C  | 3.57960  | -3.23954 | -0.98126 |
| H  | 3.61103  | -4.11976 | -1.63506 |
| H  | 3.02562  | -2.46210 | -1.52014 |
| H  | 4.61169  | -2.89498 | -0.85624 |
| C  | 0.24571  | -1.77296 | 2.19805  |
| H  | -0.11056 | -2.40008 | 1.38110  |
| H  | 0.31495  | -2.41673 | 3.08036  |
| H  | -0.50863 | -0.99942 | 2.37564  |
| C  | 1.45223  | -0.48785 | 0.42145  |
| H  | 1.18328  | -1.26516 | -0.29740 |
| H  | 0.64803  | 0.25508  | 0.40877  |
| H  | 2.37378  | -0.02274 | 0.06535  |
| C  | 2.54551  | 1.23022  | 2.41362  |
| H  | 3.49084  | 0.98674  | 1.92723  |
| H  | 1.88425  | 1.74233  | 1.71437  |
| H  | 2.73078  | 1.86293  | 3.28225  |

27A

Filename: reac\_TMS\_eqMeeqMe.out

B3LYP/6-31g\*: -738.34950610 Hartree

ZPE: 798.094 kJ/mol

DeltaG (excl. ZPE): -118.561 kJ/mol

Low frequencies: 24.19 47.83 61.16

Cartesian coordinates:

|   |         |          |          |
|---|---------|----------|----------|
| C | 0.06239 | 0.01048  | 0.01148  |
| H | 0.07209 | 0.10419  | 1.10208  |
| C | 1.51751 | -0.05958 | -0.51675 |

|    |          |          |          |
|----|----------|----------|----------|
| H  | 1.93315  | -1.00962 | -0.15722 |
| H  | 2.10245  | 0.74125  | -0.05385 |
| C  | 1.60103  | 0.01528  | -2.02357 |
| C  | 2.14384  | 1.01973  | -2.73801 |
| H  | 2.10095  | 0.87736  | -3.82189 |
| H  | 1.17621  | -0.84137 | -2.55111 |
| N  | -0.53795 | 1.27583  | -0.50794 |
| C  | -1.33213 | 2.07196  | 0.11303  |
| H  | -1.59331 | 1.79631  | 1.13540  |
| Si | 3.10966  | 2.57827  | -2.19717 |
| C  | 3.59280  | 3.47493  | -3.78143 |
| H  | 4.22952  | 2.84920  | -4.41781 |
| H  | 2.71434  | 3.76247  | -4.37177 |
| H  | 4.15270  | 4.39040  | -3.55759 |
| C  | 2.00796  | 3.72067  | -1.14880 |
| H  | 1.10227  | 4.02353  | -1.69051 |
| H  | 1.71311  | 3.27396  | -0.19112 |
| H  | 2.55675  | 4.64047  | -0.91284 |
| C  | 4.63739  | 2.08142  | -1.20613 |
| H  | 5.23007  | 2.96859  | -0.95207 |
| H  | 4.39034  | 1.57263  | -0.26708 |
| H  | 5.28095  | 1.41007  | -1.78588 |
| H  | -0.24260 | 1.50083  | -1.46770 |
| C  | -1.89809 | 3.31023  | -0.46942 |
| H  | -2.99397 | 3.26185  | -0.42236 |
| H  | -1.59990 | 4.16753  | 0.14850  |
| H  | -1.58135 | 3.47771  | -1.50143 |
| C  | -0.82135 | -1.17253 | -0.40249 |
| H  | -0.91993 | -1.24756 | -1.48936 |
| H  | -0.36901 | -2.09929 | -0.03658 |
| H  | -1.82272 | -1.08765 | 0.03129  |

27B

Filename: reac\_TMS\_eqMeaxMe.out

B3LYP/6-31g\*: -738.34951830 Hartree

ZPE: 798.073 kJ/mol

DeltaG (excl. ZPE): -118.700 kJ/mol

Low frequencies: 23.66 47.39 60.72

Cartesian coordinates:

|    |          |          |          |
|----|----------|----------|----------|
| C  | 0.05944  | -0.01152 | 0.01182  |
| H  | 0.06707  | -0.10671 | 1.10229  |
| C  | 1.51548  | 0.05829  | -0.51448 |
| H  | 2.09939  | -0.74307 | -0.05122 |
| H  | 1.93120  | 1.00793  | -0.15386 |
| C  | 1.60139  | -0.01592 | -2.02133 |
| C  | 2.14700  | -1.01868 | -2.73590 |
| H  | 2.10502  | -0.87465 | -3.81956 |
| H  | 1.17729  | 0.84101  | -2.54884 |
| N  | -0.54116 | -1.27567 | -0.51014 |
| C  | -1.33629 | -2.07224 | 0.10868  |
| H  | -1.59887 | -1.79764 | 1.13092  |
| Si | 3.11258  | -2.57789 | -2.19606 |
| C  | 3.58813  | -3.47806 | -3.78031 |
| H  | 2.70722  | -3.76706 | -4.36624 |
| H  | 4.22234  | -2.85410 | -4.42094 |
| H  | 4.14892  | -4.39308 | -3.55660 |
| C  | 4.64529  | -2.08133 | -1.21260 |
| H  | 5.28814  | -1.41341 | -1.79707 |
| H  | 4.40281  | -1.56862 | -0.27449 |
| H  | 5.23713  | -2.96887 | -0.95768 |
| C  | 2.01369  | -3.71679 | -1.14117 |
| H  | 2.56163  | -4.63732 | -0.90609 |
| H  | 1.72380  | -3.26793 | -0.18300 |

|   |          |          |          |
|---|----------|----------|----------|
| H | 1.10510  | -4.01858 | -1.67854 |
| H | -0.24512 | -1.49961 | -1.46980 |
| C | -1.90175 | -3.30961 | -0.47557 |
| H | -1.60485 | -4.16754 | 0.14217  |
| H | -2.99771 | -3.26083 | -0.42988 |
| H | -1.58372 | -3.47640 | -1.50724 |
| C | -0.82381 | 1.17218  | -0.40097 |
| H | -0.92161 | 1.24894  | -1.48769 |
| H | -1.82539 | 1.08651  | 0.03209  |
| H | -0.37153 | 2.09829  | -0.03322 |

27C

Filename: reac\_TMS\_axMeeqMe\_f.out

B3LYP/6-31g\*: -738.34742804 Hartree

ZPE: 798.968 kJ/mol

DeltaG (excl. ZPE): -118.600 kJ/mol

Low frequencies: 24.64 43.45 58.47

Cartesian coordinates:

|    |          |          |          |
|----|----------|----------|----------|
| C  | 0.00000  | 0.00000  | 0.00000  |
| H  | 0.00000  | 0.00000  | 1.09274  |
| C  | 1.46706  | 0.00000  | -0.50848 |
| H  | 1.88656  | -0.98119 | -0.25435 |
| H  | 2.03548  | 0.74802  | 0.05274  |
| C  | 1.56992  | 0.25106  | -1.99456 |
| C  | 2.04280  | 1.37056  | -2.57723 |
| H  | 2.01998  | 1.35112  | -3.67092 |
| H  | 1.21059  | -0.56446 | -2.62557 |
| N  | -0.60213 | 1.29395  | -0.43800 |
| C  | -1.49396 | 2.02449  | 0.13315  |
| Si | 2.89969  | 2.92120  | -1.85461 |
| C  | 4.55337  | 2.41586  | -1.10025 |
| H  | 4.43427  | 1.72288  | -0.25907 |
| H  | 5.19266  | 1.92587  | -1.84316 |
| H  | 5.09182  | 3.29634  | -0.72933 |
| C  | 3.13274  | 4.11186  | -3.29465 |
| H  | 3.73971  | 3.66672  | -4.09157 |
| H  | 2.17484  | 4.41287  | -3.73589 |
| H  | 3.64344  | 5.02446  | -2.96555 |
| C  | 1.82359  | 3.76613  | -0.53267 |
| H  | 2.32867  | 4.67810  | -0.19173 |
| H  | 0.84970  | 4.07984  | -0.93162 |
| H  | 1.65652  | 3.14722  | 0.35709  |
| H  | -0.19976 | 1.61947  | -1.32825 |
| C  | -2.18039 | 1.73401  | 1.41255  |
| H  | -3.26492 | 1.74274  | 1.23991  |
| H  | -1.89383 | 0.78612  | 1.86769  |
| H  | -1.97978 | 2.55532  | 2.11407  |
| H  | -1.75335 | 2.94479  | -0.38960 |
| C  | -0.85134 | -1.16369 | -0.52407 |
| H  | -0.91569 | -1.15950 | -1.61584 |
| H  | -0.39296 | -2.10708 | -0.21185 |
| H  | -1.86711 | -1.12840 | -0.11803 |

27D

Filename: reac\_TMS\_axMeaxMe\_f.out

B3LYP/6-31g\*: -738.34743508 Hartree

ZPE: 798.956 kJ/mol

DeltaG (excl. ZPE): -118.517 kJ/mol

Low frequencies: 25.08 43.69 58.69

Cartesian coordinates:

|   |         |         |         |
|---|---------|---------|---------|
| C | 0.00000 | 0.00000 | 0.00000 |
| H | 0.00000 | 0.00000 | 1.09277 |

|    |          |          |          |
|----|----------|----------|----------|
| C  | 1.46758  | 0.00000  | -0.50751 |
| H  | 2.03629  | -0.74672 | 0.05517  |
| H  | 1.88630  | 0.98181  | -0.25421 |
| C  | 1.57224  | -0.25337 | -1.99311 |
| C  | 2.04612  | -1.37362 | -2.57378 |
| H  | 2.02354  | -1.35653 | -3.66748 |
| H  | 1.21367  | 0.56110  | -2.62585 |
| N  | -0.60245 | -1.29394 | -0.43764 |
| C  | -1.49588 | -2.02272 | 0.13346  |
| Si | 2.90302  | -2.92267 | -1.84740 |
| C  | 3.13835  | -4.11550 | -3.28532 |
| H  | 2.18104  | -4.41463 | -3.72919 |
| H  | 3.74861  | -3.67215 | -4.08078 |
| H  | 3.64603  | -5.02898 | -2.95411 |
| C  | 4.55570  | -2.41755 | -1.09042 |
| H  | 5.19668  | -1.92980 | -1.83342 |
| H  | 4.43656  | -1.72285 | -0.25067 |
| H  | 5.09256  | -3.29793 | -0.71699 |
| C  | 1.82421  | -3.76569 | -0.52605 |
| H  | 2.32694  | -4.67923 | -0.18579 |
| H  | 1.65896  | -3.14716 | 0.36430  |
| H  | 0.84953  | -4.07663 | -0.92540 |
| H  | -0.19892 | -1.62156 | -1.32653 |
| C  | -2.18487 | -1.72883 | 1.41079  |
| H  | -1.99323 | -2.55271 | 2.11179  |
| H  | -1.89358 | -0.78357 | 1.86826  |
| H  | -3.26885 | -1.72986 | 1.23382  |
| H  | -1.75525 | -2.94399 | -0.38772 |
| C  | -0.85060 | 1.16423  | -0.52420 |
| H  | -0.91464 | 1.15998  | -1.61597 |
| H  | -1.86665 | 1.12975  | -0.11875 |
| H  | -0.39199 | 2.10741  | -0.21174 |

27E

Filename: reac\_MeTMS\_eqMeeqMe\_f.out

B3LYP/6-31g\*: -777.65968429 Hartree

ZPE: 872.556 kJ/mol

DeltaG (excl. ZPE): -124.616 kJ/mol

Low frequencies: 18.52 38.99 56.75

Cartesian coordinates:

|    |          |          |          |
|----|----------|----------|----------|
| C  | 0.10503  | 0.38455  | 0.64621  |
| H  | -0.28137 | 1.09988  | 1.37897  |
| C  | -0.95992 | 0.18972  | -0.46334 |
| H  | -0.65769 | -0.61324 | -1.14110 |
| H  | -0.94720 | 1.11858  | -1.05033 |
| C  | -2.33943 | -0.03881 | 0.09624  |
| C  | -3.12542 | -1.11865 | -0.06055 |
| H  | -4.09390 | -1.03776 | 0.44533  |
| H  | -2.71520 | 0.80249  | 0.68719  |
| N  | 0.25651  | -0.90720 | 1.41534  |
| C  | -0.47439 | -1.10741 | 2.46211  |
| H  | -1.11548 | -0.27490 | 2.74246  |
| Si | -2.99555 | -2.74158 | -1.04343 |
| C  | -4.62834 | -2.91919 | -1.96751 |
| H  | -5.48554 | -2.89759 | -1.28457 |
| H  | -4.76569 | -2.11437 | -2.69880 |
| H  | -4.66405 | -3.87075 | -2.51136 |
| C  | -1.55998 | -2.80454 | -2.27722 |
| H  | -1.56593 | -1.95411 | -2.96856 |
| H  | -0.57271 | -2.85420 | -1.80137 |
| H  | -1.65819 | -3.71197 | -2.88606 |
| C  | -2.79952 | -4.14760 | 0.21287  |
| H  | -2.84248 | -5.12114 | -0.29025 |

|   |          |          |          |
|---|----------|----------|----------|
| H | -1.83836 | -4.10045 | 0.74148  |
| H | -3.59816 | -4.13481 | 0.96419  |
| C | 1.16915  | -1.92168 | 0.84844  |
| H | 0.92606  | -2.91128 | 1.22685  |
| H | 1.05664  | -1.92112 | -0.23587 |
| H | 2.19963  | -1.66430 | 1.10434  |
| C | -0.53571 | -2.31518 | 3.32258  |
| H | -0.48291 | -1.99971 | 4.37141  |
| H | -1.52102 | -2.78367 | 3.19009  |
| H | 0.23931  | -3.05690 | 3.13392  |
| C | 1.45090  | 0.89390  | 0.13094  |
| H | 1.85531  | 0.27426  | -0.67478 |
| H | 1.29987  | 1.89857  | -0.27443 |
| H | 2.19266  | 0.96766  | 0.93261  |

27F

Filename: reac\_MeTMS\_eqMeaxMe\_f.out

B3LYP/6-31g\*: -777.65830279 Hartree

ZPE: 872.439 kJ/mol

DeltaG (excl. ZPE): -124.392 kJ/mol

Low frequencies: 17.04 47.93 60.17

Cartesian coordinates:

|    |          |          |          |
|----|----------|----------|----------|
| C  | 0.18180  | 0.23506  | 0.75066  |
| H  | 1.20412  | 0.22097  | 0.36420  |
| C  | -0.78370 | 0.02848  | -0.44963 |
| H  | -0.51287 | -0.89697 | -0.96857 |
| H  | -0.56354 | 0.85163  | -1.14407 |
| C  | -2.24867 | 0.03613  | -0.09961 |
| C  | -3.13293 | -0.95101 | -0.33635 |
| H  | -4.15745 | -0.72153 | -0.02814 |
| H  | -2.60625 | 0.96510  | 0.35125  |
| N  | 0.12192  | -0.97244 | 1.66038  |
| C  | -0.87475 | -1.14235 | 2.46449  |
| H  | -1.61040 | -0.34453 | 2.46357  |
| Si | -2.95232 | -2.62523 | -1.23589 |
| C  | -4.66892 | -3.40139 | -1.25149 |
| H  | -5.05446 | -3.56151 | -0.23728 |
| H  | -5.38959 | -2.76975 | -1.78412 |
| H  | -4.65354 | -4.37540 | -1.75438 |
| C  | -2.32457 | -2.35627 | -2.99671 |
| H  | -2.99003 | -1.68721 | -3.55402 |
| H  | -1.31783 | -1.92351 | -3.03076 |
| H  | -2.28907 | -3.31023 | -3.53689 |
| C  | -1.75854 | -3.76797 | -0.29826 |
| H  | -1.72364 | -4.74920 | -0.78696 |
| H  | -0.73053 | -3.38557 | -0.28025 |
| H  | -2.08361 | -3.93689 | 0.73577  |
| C  | 1.23721  | -1.92344 | 1.49046  |
| H  | 1.05337  | -2.85280 | 2.02258  |
| H  | 1.34948  | -2.13414 | 0.42460  |
| H  | 2.15253  | -1.45485 | 1.86289  |
| C  | -1.13013 | -2.27247 | 3.39177  |
| H  | -1.20539 | -1.87189 | 4.41168  |
| H  | -2.11585 | -2.69351 | 3.15633  |
| H  | -0.38799 | -3.06896 | 3.37586  |
| C  | -0.01419 | 1.54140  | 1.52254  |
| H  | -1.02596 | 1.66405  | 1.91830  |
| H  | 0.69788  | 1.62044  | 2.34999  |
| H  | 0.16930  | 2.37657  | 0.83993  |

27G

Filename: reac\_MeTMS\_axMeeqMe\_f.out

B3LYP/6-31g\*: -777.65395986 Hartree  
 ZPE: 873.276 kJ/mol  
 DeltaG (excl. ZPE): -122.061 kJ/mol  
 Low frequencies: 27.23 36.44 57.52

Cartesian coordinates:

|    |          |          |          |
|----|----------|----------|----------|
| C  | -0.18101 | 0.29127  | 1.14280  |
| H  | -0.81500 | 1.16076  | 1.33655  |
| C  | -0.12021 | 0.09621  | -0.39060 |
| H  | 0.40833  | -0.82542 | -0.64454 |
| H  | 0.49829  | 0.92621  | -0.76152 |
| C  | -1.48014 | 0.14944  | -1.04244 |
| C  | -2.06465 | -0.79261 | -1.80067 |
| H  | -3.05824 | -0.51502 | -2.16662 |
| H  | -2.01164 | 1.08970  | -0.86504 |
| N  | -0.95405 | -0.83719 | 1.80512  |
| C  | -0.54757 | -2.05007 | 1.97511  |
| Si | -1.51012 | -2.49516 | -2.44269 |
| C  | -2.17081 | -3.82699 | -1.26321 |
| H  | -1.73769 | -3.74589 | -0.25717 |
| H  | -3.26036 | -3.76791 | -1.15862 |
| H  | -1.93149 | -4.82872 | -1.64022 |
| C  | -2.30427 | -2.69401 | -4.13938 |
| H  | -3.39603 | -2.60744 | -4.08812 |
| H  | -1.94368 | -1.93506 | -4.84335 |
| H  | -2.07141 | -3.67688 | -4.56601 |
| C  | 0.37038  | -2.66644 | -2.60207 |
| H  | 0.60085  | -3.56763 | -3.18358 |
| H  | 0.81333  | -1.81703 | -3.13468 |
| H  | 0.89036  | -2.77132 | -1.64212 |
| C  | -2.31514 | -0.45265 | 2.24661  |
| H  | -2.81712 | -1.30492 | 2.70543  |
| H  | -2.23505 | 0.36637  | 2.96554  |
| H  | -2.87152 | -0.12171 | 1.36659  |
| C  | 0.74680  | -2.66640 | 1.59143  |
| H  | 0.53874  | -3.63946 | 1.13130  |
| H  | 1.35747  | -2.07116 | 0.91854  |
| H  | 1.31729  | -2.87646 | 2.50779  |
| H  | -1.25554 | -2.70666 | 2.47908  |
| C  | 1.16864  | 0.55356  | 1.81979  |
| H  | 1.93672  | -0.17741 | 1.55945  |
| H  | 1.52550  | 1.53290  | 1.48700  |
| H  | 1.07002  | 0.58957  | 2.90945  |

27H

Filename: reac\_MeTMS\_axMeaxMe\_f.out

B3LYP/6-31g\*: -777.65626284 Hartree  
 ZPE: 873.950 kJ/mol  
 DeltaG (excl. ZPE): -124.343 kJ/mol  
 Low frequencies: 11.48 34.84 46.81

Cartesian coordinates:

|    |          |          |          |
|----|----------|----------|----------|
| C  | -0.25399 | 0.35090  | 1.03886  |
| H  | 0.81558  | 0.48791  | 1.19960  |
| C  | -0.47620 | 0.16567  | -0.48748 |
| H  | 0.10466  | -0.69646 | -0.82531 |
| H  | -0.01317 | 1.05377  | -0.94280 |
| C  | -1.90516 | 0.06703  | -0.96068 |
| C  | -2.45684 | -0.93885 | -1.66271 |
| H  | -3.50138 | -0.76243 | -1.94077 |
| H  | -2.51459 | 0.94683  | -0.74196 |
| N  | -0.60298 | -0.92077 | 1.78041  |
| C  | 0.25970  | -1.84270 | 2.05638  |
| Si | -1.81570 | -2.58467 | -2.36862 |
| C  | -3.22336 | -3.82510 | -2.15795 |

|   |          |          |          |
|---|----------|----------|----------|
| H | -3.46436 | -3.99978 | -1.10226 |
| H | -4.13932 | -3.48212 | -2.65318 |
| H | -2.95663 | -4.79306 | -2.59881 |
| C | -1.41623 | -2.32447 | -4.19372 |
| H | -2.28872 | -1.95397 | -4.74386 |
| H | -0.60460 | -1.60119 | -4.33325 |
| H | -1.10781 | -3.26778 | -4.66058 |
| C | -0.28213 | -3.26278 | -1.47158 |
| H | -0.07742 | -4.27682 | -1.83635 |
| H | 0.62289  | -2.67145 | -1.65411 |
| H | -0.44084 | -3.34046 | -0.38798 |
| C | -2.02528 | -1.11473 | 2.15083  |
| H | -2.15950 | -2.11630 | 2.56019  |
| H | -2.30838 | -0.36940 | 2.89567  |
| H | -2.63084 | -0.99379 | 1.25050  |
| C | 1.71104  | -1.87599 | 1.74818  |
| H | 1.90378  | -2.76475 | 1.13205  |
| H | 2.10131  | -1.00015 | 1.23302  |
| H | 2.26423  | -2.02744 | 2.68442  |
| H | -0.13788 | -2.71146 | 2.57936  |
| C | -0.96849 | 1.55951  | 1.64823  |
| H | -2.05054 | 1.53809  | 1.50136  |
| H | -0.75588 | 1.65483  | 2.71782  |
| H | -0.58676 | 2.45808  | 1.15402  |

28A

Filename: TS1\_TMS\_eqMeeqMe\_f.out

B3LYP/6-31g\*: -738.32659577 Hartree

ZPE: 799.717 kJ/mol

DeltaG (excl. ZPE): -107.618 kJ/mol

Low frequencies: -103.74 57.30 79.76

Cartesian coordinates:

|    |          |          |          |
|----|----------|----------|----------|
| C  | 0.00000  | 0.00000  | 0.00000  |
| C  | 0.00000  | 0.00000  | 1.66261  |
| N  | 1.35195  | 0.00000  | 2.11034  |
| C  | 2.18881  | -1.03971 | 1.70895  |
| C  | 2.22741  | -1.13109 | -0.08426 |
| C  | 0.85164  | -1.10531 | -0.39428 |
| H  | 0.39480  | 0.98414  | -0.26163 |
| H  | -1.03326 | -0.09581 | -0.33845 |
| H  | -0.48048 | -0.93394 | 1.96575  |
| H  | 1.72574  | -2.00238 | 1.93136  |
| H  | 2.66995  | -2.10912 | -0.30512 |
| H  | 0.35984  | -2.01773 | -0.73833 |
| H  | 1.78849  | 0.91795  | 2.14851  |
| Si | 3.38036  | 0.25143  | -0.91066 |
| C  | 5.13836  | -0.41768 | -0.87837 |
| H  | 5.57755  | -0.45230 | 0.12297  |
| H  | 5.19620  | -1.42325 | -1.31097 |
| H  | 5.77461  | 0.23269  | -1.49169 |
| C  | 2.77393  | 0.40916  | -2.68655 |
| H  | 2.79755  | -0.55325 | -3.21049 |
| H  | 1.75239  | 0.80167  | -2.74953 |
| H  | 3.42277  | 1.09792  | -3.24116 |
| C  | 3.25276  | 1.92465  | -0.03902 |
| H  | 3.87093  | 2.63456  | -0.60414 |
| H  | 2.23925  | 2.34256  | -0.03168 |
| H  | 3.64023  | 1.92885  | 0.98574  |
| C  | 3.60053  | -0.99275 | 2.26832  |
| H  | 4.21796  | -1.77818 | 1.82701  |
| H  | 4.08603  | -0.02873 | 2.09806  |
| H  | 3.55089  | -1.16664 | 3.34857  |
| C  | -0.79455 | 1.20011  | 2.16791  |

|   |          |         |         |
|---|----------|---------|---------|
| H | -0.85944 | 1.17017 | 3.25970 |
| H | -0.32246 | 2.14374 | 1.87084 |
| H | -1.81008 | 1.18622 | 1.76406 |

28B

Filename: TS1\_TMS\_eqMeaxMe\_f.out

B3LYP/6-31g\*: -738.32312486 Hartree

ZPE: 800.207 kJ/mol

DeltaG (excl. ZPE): -107.589 kJ/mol

Low frequencies: -175.54 60.74 81.31

Cartesian coordinates:

|    |          |          |          |
|----|----------|----------|----------|
| C  | 0.00000  | 0.00000  | 0.00000  |
| C  | 0.00000  | 0.00000  | 1.65237  |
| N  | 1.36188  | 0.00000  | 2.09637  |
| C  | 2.20785  | -1.02771 | 1.70191  |
| C  | 2.22666  | -1.12423 | -0.12293 |
| C  | 0.85054  | -1.10712 | -0.41112 |
| H  | 0.40044  | 0.97817  | -0.27474 |
| H  | -1.03267 | -0.08878 | -0.34215 |
| H  | -0.44976 | 0.95394  | 1.93860  |
| H  | 1.76954  | -2.00203 | 1.91203  |
| H  | 2.67830  | -2.09680 | -0.34910 |
| H  | 0.36080  | -2.01666 | -0.76409 |
| H  | 1.79735  | 0.91690  | 2.13622  |
| Si | 3.35968  | 0.28200  | -0.93703 |
| C  | 5.12445  | -0.36933 | -0.92758 |
| H  | 5.57502  | -0.40536 | 0.06866  |
| H  | 5.18854  | -1.37121 | -1.36771 |
| H  | 5.74699  | 0.29206  | -1.54323 |
| C  | 2.73530  | 0.45495  | -2.70522 |
| H  | 2.76856  | -0.49992 | -3.24220 |
| H  | 1.70736  | 0.83243  | -2.75339 |
| H  | 3.36865  | 1.16100  | -3.25598 |
| C  | 3.22259  | 1.94455  | -0.04605 |
| H  | 3.81744  | 2.66919  | -0.61747 |
| H  | 2.20330  | 2.34705  | -0.01390 |
| H  | 3.63175  | 1.94665  | 0.97016  |
| C  | 3.62552  | -0.95715 | 2.23830  |
| H  | 4.25045  | -1.72815 | 1.78245  |
| H  | 4.09115  | 0.01695  | 2.07099  |
| H  | 3.59443  | -1.14184 | 3.31779  |
| C  | -0.84256 | -1.15126 | 2.20455  |
| H  | -0.85151 | -1.10955 | 3.29781  |
| H  | -1.87379 | -1.06334 | 1.85052  |
| H  | -0.46893 | -2.13412 | 1.90040  |

28C

Filename: TS1\_TMS\_axMeeqMe\_f.out

B3LYP/6-31g\*: -738.32641067 Hartree

ZPE: 799.872 kJ/mol

DeltaG (excl. ZPE): -109.489 kJ/mol

Low frequencies: -256.55 35.76 67.56

Cartesian coordinates:

|   |          |          |          |
|---|----------|----------|----------|
| C | 0.00000  | 0.00000  | 0.00000  |
| C | 0.00000  | 0.00000  | 1.63670  |
| N | 1.37319  | 0.00000  | 2.05475  |
| C | 2.20990  | -1.04048 | 1.71963  |
| C | 2.16485  | -1.25320 | -0.19039 |
| C | 0.79059  | -1.15719 | -0.40904 |
| H | 0.43671  | 0.95997  | -0.28735 |
| H | -1.03823 | -0.04951 | -0.33579 |
| H | -0.48239 | -0.92336 | 1.96302  |



|    |          |          |          |
|----|----------|----------|----------|
| H  | 3.25329  | -0.76845 | 1.87276  |
| H  | 2.53586  | -2.26606 | -0.37819 |
| H  | 0.23358  | -2.05345 | -0.68897 |
| H  | 1.80578  | 0.91870  | 2.00598  |
| Si | 3.51163  | -0.00303 | -0.87135 |
| C  | 5.15222  | -0.87231 | -0.56508 |
| H  | 5.35948  | -1.04053 | 0.49854  |
| H  | 5.19189  | -1.84356 | -1.07195 |
| H  | 5.97609  | -0.26651 | -0.96101 |
| C  | 3.15217  | 0.19563  | -2.70644 |
| H  | 3.13921  | -0.77092 | -3.22264 |
| H  | 2.18828  | 0.68576  | -2.88571 |
| H  | 3.92821  | 0.80995  | -3.17891 |
| C  | 3.46296  | 1.66741  | 0.01126  |
| H  | 4.20341  | 2.32144  | -0.46671 |
| H  | 2.49958  | 2.18420  | -0.07020 |
| H  | 3.74925  | 1.61094  | 1.06907  |
| C  | 1.89288  | -2.42695 | 2.25425  |
| H  | 2.57278  | -3.16880 | 1.82898  |
| H  | 2.04232  | -2.41666 | 3.34048  |
| H  | 0.86772  | -2.74236 | 2.04867  |
| C  | -0.76663 | 1.20793  | 2.16687  |
| H  | -0.80587 | 1.17888  | 3.25966  |
| H  | -0.29341 | 2.14739  | 1.85826  |
| H  | -1.79150 | 1.20388  | 1.78669  |

28D

Filename: TS1\_TMS\_axMexaMe\_f.out

B3LYP/6-31g\*: -738.31932387 Hartree

ZPE: 800.654 kJ/mol

DeltaG (excl. ZPE): -109.245 kJ/mol

Low frequencies: -267.85 38.48 74.18

Cartesian coordinates:

|    |          |          |          |
|----|----------|----------|----------|
| C  | 0.00000  | 0.00000  | 0.00000  |
| C  | 0.00000  | 0.00000  | 1.63063  |
| N  | 1.38330  | 0.00000  | 2.04924  |
| C  | 2.29232  | -0.96612 | 1.68231  |
| C  | 2.19568  | -1.18226 | -0.25029 |
| C  | 0.81644  | -1.13584 | -0.43005 |
| H  | 0.41926  | 0.96426  | -0.29690 |
| H  | -1.03752 | -0.06742 | -0.33536 |
| H  | -0.40984 | 0.96994  | 1.92458  |
| H  | 3.30684  | -0.58603 | 1.79510  |
| H  | 2.60325  | -2.17772 | -0.45389 |
| H  | 0.28649  | -2.04616 | -0.71522 |
| H  | 1.78025  | 0.93440  | 2.03553  |
| Si | 3.47700  | 0.13524  | -0.93334 |
| C  | 5.16235  | -0.65061 | -0.64440 |
| H  | 5.39070  | -0.80726 | 0.41665  |
| H  | 5.24615  | -1.61865 | -1.15198 |
| H  | 5.94951  | -0.00352 | -1.04974 |
| C  | 3.09293  | 0.31943  | -2.76489 |
| H  | 3.12705  | -0.64517 | -3.28371 |
| H  | 2.10311  | 0.75838  | -2.93488 |
| H  | 3.83202  | 0.97515  | -3.24099 |
| C  | 3.35113  | 1.79778  | -0.04388 |
| H  | 4.05148  | 2.49118  | -0.52675 |
| H  | 2.36165  | 2.26445  | -0.11199 |
| H  | 3.65127  | 1.75288  | 1.01065  |
| C  | 2.18512  | -2.39136 | 2.19684  |
| H  | 2.99386  | -2.99738 | 1.78080  |
| H  | 2.31179  | -2.36794 | 3.28597  |
| H  | 1.23676  | -2.87623 | 1.96915  |

|   |          |          |         |
|---|----------|----------|---------|
| C | -0.89550 | -1.09775 | 2.20988 |
| H | -0.79540 | -1.13033 | 3.29854 |
| H | -1.93904 | -0.86880 | 1.97294 |
| H | -0.67745 | -2.09061 | 1.81026 |

28E

Filename: TS1\_MeTMS\_eqMeeqMe\_f.out

B3LYP/6-31g\*: -777.62918325 Hartree

ZPE: 874.987 kJ/mol

DeltaG (excl. ZPE): -112.149 kJ/mol

Low frequencies: -248.24 34.72 78.44

Cartesian coordinates:

|    |          |          |          |
|----|----------|----------|----------|
| C  | 0.00000  | 0.00000  | 0.00000  |
| C  | 0.00000  | 0.00000  | 1.66265  |
| N  | 1.37312  | 0.00000  | 2.07527  |
| C  | 2.07943  | -1.15753 | 1.75700  |
| C  | 1.99873  | -1.49819 | -0.06537 |
| C  | 0.64088  | -1.25329 | -0.33967 |
| H  | 0.55935  | 0.89799  | -0.27444 |
| H  | -1.03514 | 0.07544  | -0.33710 |
| H  | -0.45799 | -0.94159 | 1.97548  |
| H  | 1.51150  | -2.03451 | 2.06839  |
| H  | 2.22398  | -2.56957 | -0.14158 |
| H  | -0.02057 | -2.09171 | -0.56859 |
| C  | 2.03656  | 1.29771  | 2.23390  |
| H  | 1.51299  | 1.87711  | 2.99657  |
| H  | 3.06126  | 1.15213  | 2.56927  |
| H  | 2.04808  | 1.87519  | 1.30117  |
| Si | 3.35827  | -0.63166 | -1.21446 |
| C  | 4.98199  | -1.54952 | -0.95437 |
| H  | 5.48258  | -1.30878 | -0.01201 |
| H  | 4.85297  | -2.63689 | -1.00449 |
| H  | 5.66679  | -1.27113 | -1.76559 |
| C  | 2.71719  | -0.95226 | -2.95763 |
| H  | 2.54915  | -2.01916 | -3.14429 |
| H  | 1.77661  | -0.42396 | -3.15341 |
| H  | 3.45009  | -0.60402 | -3.69566 |
| C  | 3.57417  | 1.22289  | -0.94943 |
| H  | 4.27019  | 1.58169  | -1.71912 |
| H  | 2.64666  | 1.79189  | -1.07884 |
| H  | 4.01142  | 1.48229  | 0.01945  |
| C  | 3.52257  | -1.27397 | 2.20747  |
| H  | 3.91933  | -2.24875 | 1.91501  |
| H  | 4.17233  | -0.50442 | 1.78830  |
| H  | 3.56420  | -1.21005 | 3.30115  |
| C  | -0.85204 | 1.16327  | 2.16413  |
| H  | -0.82313 | 1.20787  | 3.25777  |
| H  | -0.52625 | 2.12619  | 1.76168  |
| H  | -1.89088 | 1.00500  | 1.86300  |

28F

Filename: TS1\_MeTMS\_eqMeaxMe\_f.out

B3LYP/6-31g\*: -777.62829173 Hartree

ZPE: 874.456 kJ/mol

DeltaG (excl. ZPE): -112.327 kJ/mol

Low frequencies: -268.80 42.10 85.25

Cartesian coordinates:

|   |         |          |          |
|---|---------|----------|----------|
| C | 0.00000 | 0.00000  | 0.00000  |
| C | 0.00000 | 0.00000  | 1.64590  |
| N | 1.37520 | 0.00000  | 2.06502  |
| C | 2.13722 | -1.11026 | 1.72457  |
| C | 2.03212 | -1.44566 | -0.10867 |

|    |          |          |          |
|----|----------|----------|----------|
| C  | 0.67169  | -1.23333 | -0.37886 |
| H  | 0.54323  | 0.90694  | -0.27952 |
| H  | -1.03470 | 0.06230  | -0.34252 |
| H  | -0.43756 | 0.96064  | 1.92800  |
| H  | 1.63181  | -2.02821 | 2.01843  |
| H  | 2.29439  | -2.50645 | -0.21134 |
| H  | 0.04045  | -2.07617 | -0.66560 |
| C  | 1.96745  | 1.32512  | 2.27952  |
| H  | 1.35973  | 1.86318  | 3.01091  |
| H  | 2.97490  | 1.23252  | 2.68170  |
| H  | 2.00629  | 1.91298  | 1.35355  |
| Si | 3.36037  | -0.50588 | -1.24524 |
| C  | 5.00389  | -1.39908 | -1.03183 |
| H  | 5.50345  | -1.18921 | -0.08171 |
| H  | 4.89752  | -2.48559 | -1.13005 |
| H  | 5.67826  | -1.06996 | -1.83280 |
| C  | 2.70948  | -0.77623 | -2.99272 |
| H  | 2.56570  | -1.83914 | -3.21806 |
| H  | 1.75483  | -0.26384 | -3.16021 |
| H  | 3.42707  | -0.38260 | -3.72303 |
| C  | 3.53325  | 1.34106  | -0.90924 |
| H  | 4.21982  | 1.74487  | -1.66507 |
| H  | 2.59248  | 1.89236  | -1.01695 |
| H  | 3.96525  | 1.57391  | 0.06866  |
| C  | 3.58974  | -1.14704 | 2.15499  |
| H  | 4.04197  | -2.08902 | 1.83686  |
| H  | 4.18501  | -0.32801 | 1.74856  |
| H  | 3.64081  | -1.10595 | 3.24955  |
| C  | -0.86073 | -1.12829 | 2.21714  |
| H  | -0.85965 | -1.07770 | 3.31041  |
| H  | -1.89305 | -1.01571 | 1.87232  |
| H  | -0.51922 | -2.12393 | 1.91848  |

28G

Filename: TS1\_MeTMS\_axMeeqMe\_f.out

B3LYP/6-31g\*: -777.63159446 Hartree

ZPE: 874.121 kJ/mol

DeltaG (excl. ZPE): -113.001 kJ/mol

Low frequencies: -276.53 30.94 80.19

Cartesian coordinates:

|    |          |          |          |
|----|----------|----------|----------|
| C  | 0.00000  | 0.00000  | 0.00000  |
| C  | 0.00000  | 0.00000  | 1.64820  |
| N  | 1.38269  | 0.00000  | 2.05028  |
| C  | 2.12851  | -1.12049 | 1.74130  |
| C  | 2.05521  | -1.42659 | -0.14800 |
| C  | 0.69098  | -1.22272 | -0.38171 |
| H  | 0.51430  | 0.92079  | -0.28611 |
| H  | -1.04001 | 0.03158  | -0.33120 |
| H  | -0.46238 | -0.93542 | 1.96409  |
| H  | 3.19038  | -0.93679 | 1.88572  |
| H  | 2.32248  | -2.48304 | -0.26054 |
| H  | 0.05849  | -2.08013 | -0.62062 |
| C  | 2.05613  | 1.29967  | 2.16167  |
| H  | 1.64524  | 1.85379  | 3.00892  |
| H  | 3.11967  | 1.13992  | 2.34103  |
| H  | 1.93350  | 1.90676  | 1.25663  |
| Si | 3.48107  | -0.44259 | -1.07484 |
| C  | 5.03826  | -0.46889 | -0.01322 |
| H  | 4.99784  | 0.20960  | 0.84651  |
| H  | 5.27298  | -1.47511 | 0.35417  |
| H  | 5.88931  | -0.14861 | -0.62706 |
| C  | 3.72177  | -1.48335 | -2.62591 |
| H  | 4.00304  | -2.51656 | -2.39216 |

|   |          |          |          |
|---|----------|----------|----------|
| H | 2.81522  | -1.51151 | -3.24135 |
| H | 4.52416  | -1.05703 | -3.24038 |
| C | 2.99311  | 1.31407  | -1.55270 |
| H | 3.78115  | 1.71521  | -2.20302 |
| H | 2.06203  | 1.34637  | -2.12957 |
| H | 2.90379  | 2.00339  | -0.70746 |
| C | 1.71027  | -2.46366 | 2.32713  |
| H | 2.37000  | -3.25590 | 1.96523  |
| H | 1.81681  | -2.41082 | 3.41706  |
| H | 0.68205  | -2.74579 | 2.09240  |
| C | -0.83691 | 1.16459  | 2.17152  |
| H | -0.80856 | 1.18931  | 3.26574  |
| H | -0.50033 | 2.13123  | 1.78741  |
| H | -1.87762 | 1.02479  | 1.86691  |

28H

Filename: TS1\_MeTMS\_axMeaxMe\_f.out

B3LYP/6-31g\*: -777.62584267 Hartree

ZPE: 873.854 kJ/mol

DeltaG (excl. ZPE): -114.603 kJ/mol

Low frequencies: -290.76 22.71 82.12

Cartesian coordinates:

|    |          |          |          |
|----|----------|----------|----------|
| C  | 0.00000  | 0.00000  | 0.00000  |
| C  | 0.00000  | 0.00000  | 1.63014  |
| N  | 1.38921  | 0.00000  | 2.03696  |
| C  | 2.24368  | -1.01925 | 1.67507  |
| C  | 2.10797  | -1.33183 | -0.23635 |
| C  | 0.73326  | -1.19240 | -0.41938 |
| H  | 0.48696  | 0.93315  | -0.29395 |
| H  | -1.04071 | 0.00387  | -0.33216 |
| H  | -0.40736 | 0.97268  | 1.91704  |
| H  | 3.27763  | -0.69654 | 1.77119  |
| H  | 2.42543  | -2.37161 | -0.37272 |
| H  | 0.13850  | -2.07133 | -0.67353 |
| C  | 1.94412  | 1.34400  | 2.26925  |
| H  | 1.51210  | 1.75575  | 3.18590  |
| H  | 3.02596  | 1.28693  | 2.39530  |
| H  | 1.71273  | 2.02294  | 1.43928  |
| Si | 3.47593  | -0.26315 | -1.15546 |
| C  | 5.09884  | -0.44308 | -0.21410 |
| H  | 5.14127  | 0.14593  | 0.70934  |
| H  | 5.31971  | -1.48763 | 0.03578  |
| H  | 5.91847  | -0.08805 | -0.85109 |
| C  | 3.58365  | -1.11827 | -2.82953 |
| H  | 3.84688  | -2.17815 | -2.73729 |
| H  | 2.63914  | -1.05171 | -3.38145 |
| H  | 4.35882  | -0.64104 | -3.44165 |
| C  | 2.99897  | 1.54570  | -1.37383 |
| H  | 3.76902  | 2.02280  | -1.99376 |
| H  | 2.04785  | 1.67002  | -1.90334 |
| H  | 2.95457  | 2.11004  | -0.43743 |
| C  | 2.07990  | -2.42948 | 2.22989  |
| H  | 2.88114  | -3.06805 | 1.84918  |
| H  | 2.18492  | -2.37905 | 3.32021  |
| H  | 1.12590  | -2.89875 | 1.99534  |
| C  | -0.91770 | -1.07989 | 2.21210  |
| H  | -0.81360 | -1.12011 | 3.30037  |
| H  | -1.95617 | -0.82043 | 1.98301  |
| H  | -0.73160 | -2.07666 | 1.80817  |

29A

Filename: int1\_TMS\_eqMeeqMe.out

B3LYP/6-31g\*: -738.33157016 Hartree  
 ZPE: 801.161 kJ/mol  
 DeltaG (excl. ZPE): -113.152 kJ/mol  
 Low frequencies: 21.19 62.94 86.94

Cartesian coordinates:

|    |          |          |          |
|----|----------|----------|----------|
| C  | 0.23983  | -0.43323 | -0.10101 |
| C  | 0.10697  | -0.02863 | 1.39190  |
| N  | 1.39503  | -0.02165 | 2.08959  |
| C  | 2.11986  | -1.27441 | 2.05976  |
| C  | 1.99893  | -2.03047 | 0.76496  |
| C  | 1.17501  | -1.62881 | -0.26241 |
| H  | 0.57592  | 0.43441  | -0.68323 |
| H  | -0.73691 | -0.70894 | -0.51691 |
| H  | -0.50374 | -0.79834 | 1.88483  |
| H  | 1.60341  | -1.97800 | 2.74822  |
| H  | 2.48549  | -3.00461 | 0.71173  |
| H  | 0.90927  | -2.38186 | -1.00748 |
| H  | 1.97776  | 0.76425  | 1.80806  |
| Si | 3.02224  | -1.01326 | -1.42785 |
| C  | 4.34916  | -2.32924 | -1.32527 |
| H  | 4.87234  | -2.33618 | -0.36412 |
| H  | 3.95706  | -3.33363 | -1.51970 |
| H  | 5.09442  | -2.11961 | -2.10431 |
| C  | 2.14067  | -0.98925 | -3.08089 |
| H  | 1.82361  | -1.98785 | -3.39815 |
| H  | 1.27180  | -0.32428 | -3.08965 |
| H  | 2.85204  | -0.61442 | -3.82977 |
| C  | 3.55986  | 0.68547  | -0.85788 |
| H  | 4.28122  | 1.05349  | -1.60112 |
| H  | 2.74032  | 1.40943  | -0.82589 |
| H  | 4.06983  | 0.68082  | 0.10883  |
| C  | 3.54949  | -1.13049 | 2.60124  |
| H  | 4.04227  | -2.10418 | 2.68197  |
| H  | 4.16369  | -0.48573 | 1.96422  |
| H  | 3.50552  | -0.68076 | 3.59636  |
| C  | -0.58240 | 1.32390  | 1.55258  |
| H  | -0.71353 | 1.55890  | 2.61211  |
| H  | 0.01399  | 2.12440  | 1.09529  |
| H  | -1.56516 | 1.32298  | 1.07053  |

29B

Filename: intl\_TMS\_eqMeaxMe.out

B3LYP/6-31g\*: -738.32795274 Hartree  
 ZPE: 802.140 kJ/mol  
 DeltaG (excl. ZPE): -112.871 kJ/mol  
 Low frequencies: 21.58 67.01 85.12

Cartesian coordinates:

|    |          |          |          |
|----|----------|----------|----------|
| C  | 0.25068  | -0.39926 | -0.19022 |
| C  | 0.13167  | 0.03241  | 1.30159  |
| N  | 1.43457  | 0.04813  | 1.98204  |
| C  | 2.18060  | -1.19438 | 1.95045  |
| C  | 2.06707  | -1.95096 | 0.65163  |
| C  | 1.20303  | -1.57757 | -0.35140 |
| H  | 0.56600  | 0.45727  | -0.79819 |
| H  | -0.72450 | -0.69934 | -0.59184 |
| H  | -0.23643 | 1.06286  | 1.32843  |
| H  | 1.68825  | -1.90723 | 2.64334  |
| H  | 2.57441  | -2.91395 | 0.58976  |
| H  | 0.95995  | -2.32511 | -1.10839 |
| H  | 2.00842  | 0.83314  | 1.68560  |
| Si | 3.09051  | -0.89704 | -1.47186 |
| C  | 4.49225  | -2.12912 | -1.32837 |
| H  | 4.99043  | -2.10388 | -0.35459 |

|   |          |          |          |
|---|----------|----------|----------|
| H | 4.16693  | -3.15529 | -1.53147 |
| H | 5.24171  | -1.87286 | -2.08949 |
| C | 2.24260  | -0.95206 | -3.14186 |
| H | 1.98885  | -1.97231 | -3.44674 |
| H | 1.33828  | -0.33725 | -3.18060 |
| H | 2.94755  | -0.55105 | -3.88319 |
| C | 3.51257  | 0.84039  | -0.92109 |
| H | 4.20623  | 1.24659  | -1.67079 |
| H | 2.64760  | 1.50974  | -0.89653 |
| H | 4.02420  | 0.88131  | 0.04383  |
| C | 3.60949  | -1.01894 | 2.48304  |
| H | 4.12375  | -1.98211 | 2.55814  |
| H | 4.20752  | -0.35947 | 1.84556  |
| H | 3.56196  | -0.57374 | 3.48004  |
| C | -0.86862 | -0.84498 | 2.06500  |
| H | -0.88718 | -0.55372 | 3.11880  |
| H | -1.87498 | -0.72285 | 1.65234  |
| H | -0.61965 | -1.91161 | 2.00799  |

29C

Filename: int1\_TMS\_axMeeqMe\_f.out

B3LYP/6-31g\*: -738.33321702 Hartree

ZPE: 801.085 kJ/mol

DeltaG (excl. ZPE): -112.211 kJ/mol

Low frequencies: 32.00 57.57 92.36

Cartesian coordinates:

|    |          |          |          |
|----|----------|----------|----------|
| C  | 0.00000  | 0.00000  | 0.00000  |
| C  | 0.00000  | 0.00000  | 1.56411  |
| N  | 1.35681  | 0.00000  | 2.08972  |
| C  | 2.24943  | -1.06457 | 1.66342  |
| C  | 2.07143  | -1.43925 | 0.16577  |
| C  | 0.93272  | -1.03876 | -0.51076 |
| H  | 0.31430  | 0.99785  | -0.34492 |
| H  | -0.99675 | -0.16073 | -0.42869 |
| H  | -0.48365 | -0.92977 | 1.88732  |
| H  | 3.27136  | -0.71671 | 1.84616  |
| H  | 2.47466  | -2.40891 | -0.14505 |
| H  | 0.67969  | -1.54091 | -1.44465 |
| H  | 1.78287  | 0.91984  | 2.02320  |
| Si | 3.45223  | -0.29353 | -1.04426 |
| C  | 5.01618  | -1.23926 | -0.62672 |
| H  | 5.23147  | -1.26052 | 0.44609  |
| H  | 4.98327  | -2.26911 | -0.99740 |
| H  | 5.85792  | -0.73708 | -1.12238 |
| C  | 2.98686  | -0.43911 | -2.85260 |
| H  | 2.84097  | -1.47972 | -3.16346 |
| H  | 2.08850  | 0.13121  | -3.11091 |
| H  | 3.81233  | -0.03808 | -3.45517 |
| C  | 3.43651  | 1.46212  | -0.39515 |
| H  | 4.20437  | 2.01970  | -0.94896 |
| H  | 2.48822  | 1.98378  | -0.55805 |
| H  | 3.70143  | 1.52717  | 0.66494  |
| C  | 2.05183  | -2.34790 | 2.49913  |
| H  | 2.76442  | -3.12660 | 2.20712  |
| H  | 2.20691  | -2.10905 | 3.55402  |
| H  | 1.04061  | -2.75001 | 2.37914  |
| C  | -0.78789 | 1.18172  | 2.12415  |
| H  | -0.81730 | 1.13068  | 3.21583  |
| H  | -0.32477 | 2.13444  | 1.83616  |
| H  | -1.81557 | 1.18071  | 1.74796  |

29D

Filename: int1\_TMS\_axMeaxMe\_f.out

B3LYP/6-31g\*: -738.32844631 Hartree  
 ZPE: 801.751 kJ/mol  
 DeltaG (excl. ZPE): -112.148 kJ/mol  
 Low frequencies: 31.68 60.33 84.11

Cartesian coordinates:

|    |          |          |          |
|----|----------|----------|----------|
| C  | 0.00000  | 0.00000  | 0.00000  |
| C  | 0.00000  | 0.00000  | 1.57284  |
| N  | 1.36128  | 0.00000  | 2.09149  |
| C  | 2.33592  | -0.97262 | 1.61700  |
| C  | 2.08781  | -1.41178 | 0.14711  |
| C  | 0.90831  | -1.06410 | -0.49170 |
| H  | 0.35537  | 0.98418  | -0.33776 |
| H  | -0.99968 | -0.12828 | -0.42840 |
| H  | -0.44886 | 0.94228  | 1.90097  |
| H  | 3.31470  | -0.48936 | 1.70344  |
| H  | 2.48054  | -2.39580 | -0.13099 |
| H  | 0.61584  | -1.62684 | -1.37817 |
| H  | 1.74662  | 0.93697  | 2.12122  |
| Si | 3.41101  | -0.31729 | -1.14890 |
| C  | 5.02048  | -1.16848 | -0.70011 |
| H  | 5.26517  | -1.09461 | 0.36401  |
| H  | 5.01813  | -2.22573 | -0.98542 |
| H  | 5.82909  | -0.67853 | -1.25909 |
| C  | 2.92005  | -0.61175 | -2.93208 |
| H  | 2.80517  | -1.67691 | -3.16269 |
| H  | 1.99681  | -0.09353 | -3.21169 |
| H  | 3.71878  | -0.22861 | -3.58047 |
| C  | 3.33622  | 1.47906  | -0.62622 |
| H  | 4.11882  | 2.01473  | -1.18066 |
| H  | 2.38713  | 1.96683  | -0.86962 |
| H  | 3.54612  | 1.62556  | 0.43810  |
| C  | 2.40897  | -2.24589 | 2.49067  |
| H  | 3.23785  | -2.88750 | 2.17129  |
| H  | 2.57781  | -1.95101 | 3.52915  |
| H  | 1.48538  | -2.82850 | 2.44327  |
| C  | -0.85903 | -1.14889 | 2.11719  |
| H  | -0.80270 | -1.17117 | 3.20858  |
| H  | -1.90555 | -1.01107 | 1.82582  |
| H  | -0.53530 | -2.12453 | 1.73742  |

29E

Filename: int1\_MeTMS\_eqMeeqMe.out

B3LYP/6-31g\*: -777.63199571 Hartree  
 ZPE: 876.627 kJ/mol  
 DeltaG (excl. ZPE): -112.617 kJ/mol  
 Low frequencies: 47.91 76.01 99.91

Cartesian coordinates:

|   |          |          |          |
|---|----------|----------|----------|
| C | 0.05900  | -0.09480 | -0.06985 |
| C | -0.01286 | 0.01348  | 1.53434  |
| N | 1.33897  | 0.12667  | 2.03511  |
| C | 2.13656  | -1.05819 | 1.80733  |
| C | 1.99937  | -1.64238 | 0.32539  |
| C | 0.82144  | -1.31260 | -0.35899 |
| H | 0.57669  | 0.82103  | -0.38754 |
| H | -0.92502 | -0.10570 | -0.54541 |
| H | -0.42410 | -0.93119 | 1.90658  |
| H | 1.64157  | -1.86411 | 2.37071  |
| H | 2.20783  | -2.72084 | 0.28626  |
| H | 0.40144  | -2.03549 | -1.05824 |
| C | 1.94767  | 1.44985  | 1.95677  |
| H | 1.36621  | 2.15578  | 2.55332  |
| H | 2.95477  | 1.42527  | 2.37116  |

|    |          |          |          |
|----|----------|----------|----------|
| H  | 2.00682  | 1.84425  | 0.92704  |
| Si | 3.42265  | -1.13274 | -1.13472 |
| C  | 4.93595  | -2.12952 | -0.64053 |
| H  | 5.41284  | -1.77843 | 0.27746  |
| H  | 4.70939  | -3.19563 | -0.53090 |
| H  | 5.66825  | -2.03508 | -1.45377 |
| C  | 2.75257  | -1.75400 | -2.77741 |
| H  | 2.45515  | -2.80830 | -2.73829 |
| H  | 1.90177  | -1.16879 | -3.14287 |
| H  | 3.54787  | -1.67536 | -3.52960 |
| C  | 3.70926  | 0.72076  | -1.16199 |
| H  | 4.45301  | 0.92408  | -1.94450 |
| H  | 2.80984  | 1.28762  | -1.42445 |
| H  | 4.10947  | 1.11394  | -0.22364 |
| C  | 3.56340  | -0.98097 | 2.34355  |
| H  | 4.02766  | -1.97000 | 2.29267  |
| H  | 4.19843  | -0.28091 | 1.79493  |
| H  | 3.54317  | -0.67725 | 3.39453  |
| C  | -0.95752 | 1.14088  | 1.94877  |
| H  | -0.95035 | 1.25459  | 3.03736  |
| H  | -0.69156 | 2.09876  | 1.49231  |
| H  | -1.97797 | 0.89455  | 1.64123  |

29F

Filename: intl\_MeTMS\_eqMeaxMe.out

B3LYP/6-31g\*: -777.63205772 Hartree

ZPE: 876.322 kJ/mol

DeltaG (excl. ZPE): -112.701 kJ/mol

Low frequencies: 48.15 82.88 94.54

Cartesian coordinates:

|    |          |          |          |
|----|----------|----------|----------|
| C  | 0.05444  | -0.16990 | -0.05580 |
| C  | -0.02549 | -0.04484 | 1.53733  |
| N  | 1.32254  | 0.05279  | 2.05703  |
| C  | 2.16487  | -1.09628 | 1.80707  |
| C  | 2.03029  | -1.67315 | 0.32935  |
| C  | 0.84658  | -1.37142 | -0.35376 |
| H  | 0.56046  | 0.74599  | -0.39341 |
| H  | -0.92831 | -0.20047 | -0.53346 |
| H  | -0.52990 | 0.90153  | 1.75105  |
| H  | 1.72250  | -1.93161 | 2.37039  |
| H  | 2.28307  | -2.74125 | 0.27177  |
| H  | 0.45978  | -2.08902 | -1.07658 |
| C  | 1.88279  | 1.39959  | 2.01030  |
| H  | 1.20844  | 2.07945  | 2.53804  |
| H  | 2.84740  | 1.43438  | 2.51684  |
| H  | 2.01588  | 1.78307  | 0.98320  |
| Si | 3.42564  | -1.10519 | -1.15291 |
| C  | 4.97108  | -2.05810 | -0.67311 |
| H  | 5.44171  | -1.69812 | 0.24453  |
| H  | 4.77968  | -3.13172 | -0.57076 |
| H  | 5.69504  | -1.93376 | -1.48993 |
| C  | 2.76188  | -1.74001 | -2.79234 |
| H  | 2.49359  | -2.80215 | -2.75473 |
| H  | 1.89421  | -1.17681 | -3.15235 |
| H  | 3.55164  | -1.63822 | -3.54770 |
| C  | 3.65353  | 0.75575  | -1.16595 |
| H  | 4.37870  | 0.98879  | -1.95766 |
| H  | 2.73419  | 1.29885  | -1.40842 |
| H  | 4.05704  | 1.15005  | -0.22949 |
| C  | 3.59353  | -0.95575 | 2.32770  |
| H  | 4.10759  | -1.91818 | 2.25254  |
| H  | 4.18329  | -0.21150 | 1.78656  |
| H  | 3.57095  | -0.67427 | 3.38471  |



|   |          |          |         |
|---|----------|----------|---------|
| C | -0.84761 | -1.18374 | 2.14814 |
| H | -0.86288 | -1.08911 | 3.23794 |
| H | -1.87898 | -1.14081 | 1.78418 |
| H | -0.45037 | -2.17357 | 1.89499 |

29G

Filename: int1\_MeTMS\_axMeeqMe.out

B3LYP/6-31g\*: -777.63788742 Hartree

ZPE: 875.372 kJ/mol

DeltaG (excl. ZPE): -114.874 kJ/mol

Low frequencies: 37.77 63.86 86.91

Cartesian coordinates:

|    |          |          |          |
|----|----------|----------|----------|
| C  | 0.02106  | 0.08329  | -0.04523 |
| C  | -0.03002 | 0.03054  | 1.56106  |
| N  | 1.32985  | 0.03233  | 2.04925  |
| C  | 2.13993  | -1.11374 | 1.66451  |
| C  | 1.84210  | -1.62822 | 0.20359  |
| C  | 0.70477  | -1.14534 | -0.45253 |
| H  | 0.59348  | 0.99251  | -0.27727 |
| H  | -0.96290 | 0.17800  | -0.51194 |
| H  | -0.48812 | -0.92401 | 1.83726  |
| H  | 3.18431  | -0.80280 | 1.74662  |
| H  | 1.94850  | -2.71488 | 0.08491  |
| H  | 0.24966  | -1.76830 | -1.22276 |
| C  | 1.99757  | 1.32854  | 2.12063  |
| H  | 1.48093  | 1.97906  | 2.82979  |
| H  | 3.01805  | 1.18776  | 2.48477  |
| H  | 2.04673  | 1.85602  | 1.15091  |
| Si | 3.41139  | -1.18473 | -1.09600 |
| C  | 4.82989  | -2.14180 | -0.32411 |
| H  | 5.08935  | -1.79543 | 0.68144  |
| H  | 4.62385  | -3.21667 | -0.27827 |
| H  | 5.71843  | -2.00579 | -0.95489 |
| C  | 2.92217  | -1.87763 | -2.76832 |
| H  | 2.59997  | -2.92365 | -2.70985 |
| H  | 2.12598  | -1.29739 | -3.24733 |
| H  | 3.79297  | -1.84820 | -3.43552 |
| C  | 3.69625  | 0.66739  | -1.12496 |
| H  | 4.52627  | 0.86853  | -1.81548 |
| H  | 2.83075  | 1.22739  | -1.49471 |
| H  | 3.98429  | 1.07021  | -0.14966 |
| C  | 1.94540  | -2.31034 | 2.62235  |
| H  | 2.59684  | -3.14540 | 2.34410  |
| H  | 2.19728  | -2.00009 | 3.63948  |
| H  | 0.91059  | -2.66743 | 2.61390  |
| C  | -0.91007 | 1.15478  | 2.10653  |
| H  | -0.89371 | 1.14646  | 3.20084  |
| H  | -0.59208 | 2.14151  | 1.75751  |
| H  | -1.94319 | 1.00037  | 1.78206  |

29H

Filename: int1\_MeTMS\_axMeaxMe\_f.out

B3LYP/6-31g\*: -777.63660415 Hartree

ZPE: 874.920 kJ/mol

DeltaG (excl. ZPE): -115.340 kJ/mol

Low frequencies: 39.50 65.27 78.19

Cartesian coordinates:

|   |          |          |          |
|---|----------|----------|----------|
| C | 0.04564  | 0.04531  | -0.07056 |
| C | -0.06915 | 0.00612  | 1.52323  |
| N | 1.26327  | -0.05308 | 2.08525  |
| C | 2.17006  | -1.11307 | 1.64782  |
| C | 1.85269  | -1.66294 | 0.21985  |

|    |          |          |          |
|----|----------|----------|----------|
| C  | 0.73047  | -1.19219 | -0.46151 |
| H  | 0.64640  | 0.93737  | -0.29736 |
| H  | -0.92007 | 0.15588  | -0.57055 |
| H  | -0.49964 | 0.96621  | 1.82156  |
| H  | 3.17267  | -0.67415 | 1.65667  |
| H  | 1.99248  | -2.74581 | 0.10870  |
| H  | 0.30398  | -1.81183 | -1.24978 |
| C  | 1.87499  | 1.25515  | 2.31327  |
| H  | 1.22972  | 1.85129  | 2.96408  |
| H  | 2.83485  | 1.13067  | 2.82195  |
| H  | 2.04646  | 1.82809  | 1.38346  |
| Si | 3.40490  | -1.18051 | -1.11692 |
| C  | 4.84998  | -2.10204 | -0.35237 |
| H  | 5.10176  | -1.75325 | 0.65415  |
| H  | 4.67422  | -3.18243 | -0.31238 |
| H  | 5.73188  | -1.93725 | -0.98581 |
| C  | 2.91998  | -1.88817 | -2.78334 |
| H  | 2.61856  | -2.94005 | -2.71926 |
| H  | 2.11164  | -1.32514 | -3.26219 |
| H  | 3.78828  | -1.84518 | -3.45321 |
| C  | 3.63212  | 0.67907  | -1.13329 |
| H  | 4.48252  | 0.90765  | -1.78967 |
| H  | 2.76554  | 1.21287  | -1.53729 |
| H  | 3.86894  | 1.08968  | -0.14713 |
| C  | 2.21384  | -2.31078 | 2.62428  |
| H  | 2.98235  | -3.02950 | 2.31898  |
| H  | 2.46070  | -1.94753 | 3.62507  |
| H  | 1.25325  | -2.83013 | 2.67482  |
| C  | -1.01203 | -1.10809 | 1.99091  |
| H  | -1.06465 | -1.11639 | 3.08319  |
| H  | -2.01988 | -0.93847 | 1.59773  |
| H  | -0.68607 | -2.09941 | 1.65910  |

30A

Filename: TS2\_TMS\_eqMeeqMe\_f.out

B3LYP/6-31g\*: -738.32488563 Hartree

ZPE: 799.165 kJ/mol

DeltaG (excl. ZPE): -108.863 kJ/mol

Low frequencies: -320.76 49.70 64.35

Cartesian coordinates:

|    |          |          |          |
|----|----------|----------|----------|
| C  | 0.00000  | 0.00000  | 0.00000  |
| C  | 0.00000  | 0.00000  | 1.92994  |
| N  | 1.32185  | 0.00000  | 2.28777  |
| C  | 2.15819  | -1.08369 | 1.87965  |
| C  | 2.19657  | -1.17793 | 0.21125  |
| C  | 0.80662  | -1.12416 | -0.20151 |
| H  | 0.43935  | 0.98870  | -0.09990 |
| H  | -1.04251 | -0.05609 | -0.30721 |
| H  | -0.49068 | -0.95184 | 2.12194  |
| H  | 1.66856  | -2.01384 | 2.18245  |
| H  | 2.59684  | -2.18109 | 0.01910  |
| H  | 0.30665  | -2.05536 | -0.47556 |
| H  | 1.77266  | 0.91180  | 2.32074  |
| Si | 3.39527  | 0.08357  | -0.71645 |
| C  | 5.14729  | -0.59921 | -0.61052 |
| H  | 5.57898  | -0.54621 | 0.39346  |
| H  | 5.19629  | -1.64178 | -0.94625 |
| H  | 5.79708  | -0.01735 | -1.27598 |
| C  | 2.82709  | 0.11621  | -2.51244 |
| H  | 2.84950  | -0.88421 | -2.96060 |
| H  | 1.81255  | 0.51345  | -2.62970 |
| H  | 3.49718  | 0.75114  | -3.10442 |
| C  | 3.29749  | 1.82245  | 0.02849  |

|   |          |          |          |
|---|----------|----------|----------|
| H | 3.96136  | 2.47572  | -0.55220 |
| H | 2.29946  | 2.27323  | -0.03046 |
| H | 3.64398  | 1.87919  | 1.06715  |
| C | 3.54713  | -1.02955 | 2.50693  |
| H | 4.16856  | -1.84196 | 2.12279  |
| H | 4.05620  | -0.08343 | 2.30232  |
| H | 3.46274  | -1.14811 | 3.59144  |
| C | -0.82178 | 1.20978  | 2.31432  |
| H | -0.98082 | 1.19661  | 3.39916  |
| H | -0.32009 | 2.14550  | 2.04737  |
| H | -1.80104 | 1.18754  | 1.83134  |

30B

Filename: TS2\_TMS\_eqMeaxMe\_f.out

B3LYP/6-31g\*: -738.32031009 Hartree

ZPE: 799.608 kJ/mol

DeltaG (excl. ZPE): -108.464 kJ/mol

Low frequencies: -313.17 53.30 68.36

Cartesian coordinates:

|    |          |          |          |
|----|----------|----------|----------|
| C  | 0.00000  | 0.00000  | 0.00000  |
| C  | 0.00000  | 0.00000  | 1.96942  |
| N  | 1.32746  | 0.00000  | 2.30161  |
| C  | 2.17412  | -1.08494 | 1.90673  |
| C  | 2.18567  | -1.19697 | 0.24249  |
| C  | 0.79401  | -1.13309 | -0.17534 |
| H  | 0.45129  | 0.98389  | -0.08485 |
| H  | -1.04218 | -0.04256 | -0.30920 |
| H  | -0.45805 | 0.97906  | 2.10704  |
| H  | 1.71236  | -2.01908 | 2.23239  |
| H  | 2.57669  | -2.20465 | 0.05389  |
| H  | 0.29059  | -2.06045 | -0.45400 |
| H  | 1.77993  | 0.91027  | 2.28086  |
| Si | 3.37907  | 0.04737  | -0.71593 |
| C  | 5.13712  | -0.61821 | -0.60244 |
| H  | 5.57708  | -0.52961 | 0.39531  |
| H  | 5.19320  | -1.67012 | -0.90634 |
| H  | 5.77548  | -0.05128 | -1.29149 |
| C  | 2.80561  | 0.03361  | -2.51047 |
| H  | 2.83942  | -0.97656 | -2.93563 |
| H  | 1.78573  | 0.41495  | -2.63344 |
| H  | 3.46599  | 0.66298  | -3.11896 |
| C  | 3.27058  | 1.80146  | -0.00793 |
| H  | 3.92898  | 2.44731  | -0.60282 |
| H  | 2.26999  | 2.24547  | -0.07440 |
| H  | 3.61853  | 1.88248  | 1.02871  |
| C  | 3.56790  | -0.99417 | 2.51834  |
| H  | 4.20041  | -1.80028 | 2.13880  |
| H  | 4.05738  | -0.04170 | 2.29625  |
| H  | 3.49740  | -1.09962 | 3.60521  |
| C  | -0.88803 | -1.14283 | 2.41513  |
| H  | -1.03072 | -1.05918 | 3.49967  |
| H  | -1.86959 | -1.07023 | 1.94070  |
| H  | -0.47245 | -2.12862 | 2.19868  |

30C

Filename: TS2\_TMS\_axMeeqMe\_f.out

B3LYP/6-31g\*: -738.32579283 Hartree

ZPE: 799.039 kJ/mol

DeltaG (excl. ZPE): -111.100 kJ/mol

Low frequencies: -334.92 33.47 49.24

Cartesian coordinates:

|   |         |         |         |
|---|---------|---------|---------|
| C | 0.00000 | 0.00000 | 0.00000 |
|---|---------|---------|---------|

|    |          |          |          |
|----|----------|----------|----------|
| C  | 0.00000  | 0.00000  | 1.96097  |
| N  | 1.32711  | 0.00000  | 2.27911  |
| C  | 2.17819  | -1.09982 | 1.90504  |
| C  | 2.07085  | -1.39378 | 0.28866  |
| C  | 0.70744  | -1.19115 | -0.16480 |
| H  | 0.52064  | 0.95042  | -0.06492 |
| H  | -1.03313 | 0.03321  | -0.33976 |
| H  | -0.49910 | -0.94438 | 2.15664  |
| H  | 3.20294  | -0.79712 | 2.12928  |
| H  | 2.33673  | -2.44897 | 0.16092  |
| H  | 0.13981  | -2.06300 | -0.49403 |
| H  | 1.77138  | 0.91407  | 2.26645  |
| Si | 3.46570  | -0.39239 | -0.67683 |
| C  | 5.08870  | -1.21157 | -0.18640 |
| H  | 5.30060  | -1.13850 | 0.88683  |
| H  | 5.10622  | -2.27243 | -0.46166 |
| H  | 5.92077  | -0.72632 | -0.71096 |
| C  | 3.12149  | -0.56404 | -2.51697 |
| H  | 3.09137  | -1.61542 | -2.82593 |
| H  | 2.17013  | -0.10137 | -2.80384 |
| H  | 3.91234  | -0.07631 | -3.09917 |
| C  | 3.44907  | 1.42057  | -0.13859 |
| H  | 4.25694  | 1.94403  | -0.66557 |
| H  | 2.52308  | 1.94891  | -0.39325 |
| H  | 3.64776  | 1.55489  | 0.93231  |
| C  | 1.86358  | -2.38832 | 2.67735  |
| H  | 2.58370  | -3.16715 | 2.41187  |
| H  | 1.93888  | -2.20571 | 3.75358  |
| H  | 0.86259  | -2.77220 | 2.45582  |
| C  | -0.80783 | 1.22004  | 2.33619  |
| H  | -0.96264 | 1.21709  | 3.42205  |
| H  | -0.29857 | 2.14914  | 2.06063  |
| H  | -1.78946 | 1.20245  | 1.85787  |

30D

Filename: TS2\_TMS\_axMexaMe\_f.out

B3LYP/6-31g\*: -738.31908126 Hartree

ZPE: 799.985 kJ/mol

DeltaG (excl. ZPE): -110.507 kJ/mol

Low frequencies: -310.33 41.30 49.95

Cartesian coordinates:

|    |          |          |          |
|----|----------|----------|----------|
| C  | 0.00000  | 0.00000  | 0.00000  |
| C  | 0.00000  | 0.00000  | 2.03411  |
| N  | 1.33725  | 0.00000  | 2.28395  |
| C  | 2.24532  | -1.07183 | 1.86833  |
| C  | 1.80900  | -1.71228 | 0.46760  |
| C  | 0.52577  | -1.28461 | -0.05839 |
| H  | 0.64419  | 0.87165  | -0.02478 |
| H  | -0.99914 | 0.16592  | -0.39695 |
| H  | -0.44146 | 0.98979  | 2.14549  |
| H  | 3.21590  | -0.57918 | 1.77292  |
| H  | 1.79267  | -2.80278 | 0.57773  |
| H  | -0.14283 | -2.07232 | -0.40672 |
| H  | 1.75843  | 0.92116  | 2.22053  |
| Si | 3.24075  | -1.41231 | -0.88429 |
| C  | 4.78851  | -2.21312 | -0.17192 |
| H  | 5.12429  | -1.74842 | 0.76209  |
| H  | 4.64623  | -3.28421 | 0.01212  |
| H  | 5.60997  | -2.11486 | -0.89247 |
| C  | 2.69229  | -2.25573 | -2.47136 |
| H  | 2.49305  | -3.32299 | -2.31895 |
| H  | 1.78967  | -1.79813 | -2.89224 |
| H  | 3.48124  | -2.17926 | -3.22922 |

|   |          |          |          |
|---|----------|----------|----------|
| C | 3.45316  | 0.44748  | -1.10460 |
| H | 4.29441  | 0.63350  | -1.78365 |
| H | 2.57245  | 0.91975  | -1.55351 |
| H | 3.68685  | 0.96870  | -0.16816 |
| C | 2.40580  | -2.18535 | 2.91660  |
| H | 3.17056  | -2.89332 | 2.58284  |
| H | 2.72799  | -1.75935 | 3.87073  |
| H | 1.47743  | -2.73951 | 3.07849  |
| C | -0.89587 | -1.11566 | 2.51632  |
| H | -0.98999 | -1.02287 | 3.60594  |
| H | -1.89356 | -1.01701 | 2.08152  |
| H | -0.51048 | -2.11136 | 2.29345  |

30E

Filename: TS2\_MeTMS\_eqMeeqMe\_f.out

B3LYP/6-31g\*: -777.62925485 Hartree

ZPE: 874.766 kJ/mol

DeltaG (excl. ZPE): -112.290 kJ/mol

Low frequencies: -329.55 46.83 68.11

Cartesian coordinates:

|    |          |          |          |
|----|----------|----------|----------|
| C  | 0.00000  | 0.00000  | 0.00000  |
| C  | 0.00000  | 0.00000  | 1.91189  |
| N  | 1.33936  | 0.00000  | 2.23024  |
| C  | 2.04010  | -1.22204 | 1.89690  |
| C  | 1.88528  | -1.62266 | 0.30165  |
| C  | 0.55872  | -1.27193 | -0.16422 |
| H  | 0.63483  | 0.87853  | -0.09441 |
| H  | -1.01788 | 0.15579  | -0.35167 |
| H  | -0.47171 | -0.95335 | 2.13932  |
| H  | 1.48044  | -2.02766 | 2.38328  |
| H  | 1.98881  | -2.71565 | 0.28100  |
| H  | -0.10879 | -2.07211 | -0.48785 |
| C  | 2.04471  | 1.28223  | 2.31264  |
| H  | 1.50374  | 1.95163  | 2.98298  |
| H  | 3.03911  | 1.12650  | 2.72625  |
| H  | 2.14349  | 1.76607  | 1.33106  |
| Si | 3.27175  | -1.05992 | -1.00832 |
| C  | 4.82362  | -2.07870 | -0.68495 |
| H  | 5.38055  | -1.76448 | 0.20238  |
| H  | 4.59972  | -3.14738 | -0.58682 |
| H  | 5.49427  | -1.97006 | -1.54677 |
| C  | 2.55615  | -1.52534 | -2.68895 |
| H  | 2.29613  | -2.58917 | -2.74347 |
| H  | 1.65992  | -0.94554 | -2.93846 |
| H  | 3.29759  | -1.33444 | -3.47424 |
| C  | 3.63140  | 0.79142  | -0.94377 |
| H  | 4.34826  | 1.02462  | -1.74161 |
| H  | 2.74474  | 1.40796  | -1.13122 |
| H  | 4.08731  | 1.11367  | -0.00200 |
| C  | 3.47751  | -1.29779 | 2.39698  |
| H  | 3.87157  | -2.29828 | 2.20071  |
| H  | 4.14091  | -0.57782 | 1.91285  |
| H  | 3.50954  | -1.13432 | 3.47913  |
| C  | -0.87348 | 1.17945  | 2.28519  |
| H  | -0.88645 | 1.28075  | 3.37778  |
| H  | -0.53315 | 2.12178  | 1.85045  |
| H  | -1.89906 | 0.99684  | 1.95638  |

30F

Filename: TS2\_MeTMS\_eqMeaxMe\_f.out

B3LYP/6-31g\*: -777.62712720 Hartree

ZPE: 874.498 kJ/mol

DeltaG (excl. ZPE): -112.007 kJ/mol

Low frequencies: -329.86 45.63 74.27

Cartesian coordinates:

|    |          |          |          |
|----|----------|----------|----------|
| C  | 0.00000  | 0.00000  | 0.00000  |
| C  | 0.00000  | 0.00000  | 1.96354  |
| N  | 1.33823  | 0.00000  | 2.24859  |
| C  | 2.08359  | -1.19767 | 1.91687  |
| C  | 1.88806  | -1.62201 | 0.33736  |
| C  | 0.55904  | -1.26958 | -0.13477 |
| H  | 0.63146  | 0.88184  | -0.06964 |
| H  | -1.01825 | 0.15374  | -0.35144 |
| H  | -0.45324 | 0.98076  | 2.10161  |
| H  | 1.59378  | -2.02426 | 2.43764  |
| H  | 1.98159  | -2.71642 | 0.33109  |
| H  | -0.10069 | -2.07359 | -0.46265 |
| C  | 2.02506  | 1.29813  | 2.26698  |
| H  | 1.33113  | 2.06045  | 2.62423  |
| H  | 2.86933  | 1.25940  | 2.95634  |
| H  | 2.39274  | 1.58237  | 1.27321  |
| Si | 3.24379  | -1.11342 | -1.02876 |
| C  | 4.84465  | -2.03793 | -0.66426 |
| H  | 5.41414  | -1.62016 | 0.17065  |
| H  | 4.67152  | -3.10152 | -0.46300 |
| H  | 5.48272  | -1.98068 | -1.55534 |
| C  | 2.51510  | -1.74273 | -2.64959 |
| H  | 2.29377  | -2.81606 | -2.61072 |
| H  | 1.59351  | -1.21791 | -2.92691 |
| H  | 3.23425  | -1.59188 | -3.46371 |
| C  | 3.53005  | 0.74922  | -1.12365 |
| H  | 4.17895  | 0.94925  | -1.98592 |
| H  | 2.60894  | 1.31974  | -1.28851 |
| H  | 4.04008  | 1.15401  | -0.24309 |
| C  | 3.53687  | -1.17220 | 2.37496  |
| H  | 3.99524  | -2.14268 | 2.16972  |
| H  | 4.13112  | -0.40575 | 1.87224  |
| H  | 3.58799  | -1.00349 | 3.45569  |
| C  | -0.89776 | -1.12359 | 2.44139  |
| H  | -0.99742 | -1.04270 | 3.53112  |
| H  | -1.89390 | -1.01646 | 2.00429  |
| H  | -0.52677 | -2.12174 | 2.20318  |

30G

Filename: TS2\_MeTMS\_axMeeqMe\_f.out

B3LYP/6-31g\*: -777.63384521 Hartree

ZPE: 873.552 kJ/mol

DeltaG (excl. ZPE): -114.894 kJ/mol

Low frequencies: -351.19 39.83 46.80

Cartesian coordinates:

|   |          |          |          |
|---|----------|----------|----------|
| C | 0.00000  | 0.00000  | 0.00000  |
| C | 0.00000  | 0.00000  | 1.93466  |
| N | 1.34111  | 0.00000  | 2.22453  |
| C | 2.10202  | -1.19923 | 1.87649  |
| C | 1.69489  | -1.80906 | 0.44557  |
| C | 0.45558  | -1.31622 | -0.11073 |
| H | 0.69899  | 0.82993  | -0.06829 |
| H | -0.98538 | 0.22672  | -0.40204 |
| H | -0.47390 | -0.95181 | 2.15736  |
| H | 3.14982  | -0.89414 | 1.86284  |
| H | 1.62143  | -2.89847 | 0.54620  |
| H | -0.24696 | -2.05595 | -0.49632 |
| C | 2.06147  | 1.27533  | 2.27649  |
| H | 1.55818  | 1.96224  | 2.95881  |
| H | 3.06804  | 1.09685  | 2.65773  |

|    |          |          |          |
|----|----------|----------|----------|
| H  | 2.14030  | 1.75358  | 1.28800  |
| Si | 3.18219  | -1.63250 | -0.86907 |
| C  | 4.63393  | -2.55194 | -0.09942 |
| H  | 4.98557  | -2.09928 | 0.83466  |
| H  | 4.39128  | -3.60177 | 0.10145  |
| H  | 5.47927  | -2.54277 | -0.79874 |
| C  | 2.60052  | -2.46182 | -2.45250 |
| H  | 2.28941  | -3.49909 | -2.28145 |
| H  | 1.76187  | -1.92760 | -2.91377 |
| H  | 3.41568  | -2.48562 | -3.18572 |
| C  | 3.57009  | 0.19176  | -1.13448 |
| H  | 4.38290  | 0.27691  | -1.86665 |
| H  | 2.71823  | 0.74889  | -1.54043 |
| H  | 3.91188  | 0.69303  | -0.22222 |
| C  | 1.94803  | -2.30196 | 2.93985  |
| H  | 2.56848  | -3.16518 | 2.68136  |
| H  | 2.27026  | -1.92857 | 3.91605  |
| H  | 0.91094  | -2.64398 | 3.02158  |
| C  | -0.86268 | 1.18335  | 2.31601  |
| H  | -0.87198 | 1.27989  | 3.40926  |
| H  | -0.51411 | 2.12475  | 1.88587  |
| H  | -1.89041 | 1.01204  | 1.98783  |

30H

Filename: TS2\_MeTMS\_axMeaxMe\_f.out

B3LYP/6-31g\*: -777.63020836 Hartree

ZPE: 873.201 kJ/mol

DeltaG (excl. ZPE): -113.823 kJ/mol

Low frequencies: -336.48 43.86 56.60

Cartesian coordinates:

|    |          |          |          |
|----|----------|----------|----------|
| C  | 0.00000  | 0.00000  | 0.00000  |
| C  | 0.00000  | 0.00000  | 1.98465  |
| N  | 1.34030  | 0.00000  | 2.24553  |
| C  | 2.18976  | -1.12748 | 1.81456  |
| C  | 1.66170  | -1.83477 | 0.49708  |
| C  | 0.43615  | -1.31983 | -0.07594 |
| H  | 0.70759  | 0.82321  | -0.04399 |
| H  | -0.97899 | 0.23663  | -0.41170 |
| H  | -0.44670 | 0.98488  | 2.11808  |
| H  | 3.16418  | -0.67013 | 1.62411  |
| H  | 1.53210  | -2.90747 | 0.68903  |
| H  | -0.26991 | -2.05805 | -0.45635 |
| C  | 2.01340  | 1.30547  | 2.28491  |
| H  | 1.37184  | 2.03575  | 2.78093  |
| H  | 2.93588  | 1.21364  | 2.86310  |
| H  | 2.26551  | 1.67095  | 1.27792  |
| Si | 3.07634  | -1.85483 | -0.91709 |
| C  | 4.58109  | -2.67110 | -0.13375 |
| H  | 4.98707  | -2.10520 | 0.71218  |
| H  | 4.36469  | -3.68971 | 0.20794  |
| H  | 5.37848  | -2.74398 | -0.88399 |
| C  | 2.39917  | -2.88425 | -2.33627 |
| H  | 2.10777  | -3.88980 | -2.01048 |
| H  | 1.53048  | -2.41586 | -2.81283 |
| H  | 3.16823  | -3.00605 | -3.10862 |
| C  | 3.42893  | -0.07802 | -1.43036 |
| H  | 4.20927  | -0.07514 | -2.20137 |
| H  | 2.54987  | 0.41251  | -1.86280 |
| H  | 3.79906  | 0.53942  | -0.60372 |
| C  | 2.39650  | -2.17620 | 2.92155  |
| H  | 3.10768  | -2.93605 | 2.58340  |
| H  | 2.80611  | -1.70141 | 3.81773  |
| H  | 1.46292  | -2.67652 | 3.19249  |

|   |          |          |         |
|---|----------|----------|---------|
| C | -0.89731 | -1.11376 | 2.48098 |
| H | -0.98719 | -1.01658 | 3.57007 |
| H | -1.89660 | -1.01504 | 2.04882 |
| H | -0.51777 | -2.11290 | 2.26264 |

31A

Filename: int2\_TMS\_eqMeeqMe.out

B3LYP/6-31g\*: -738.34817605 Hartree

ZPE: 796.349 kJ/mol

DeltaG (excl. ZPE): -117.331 kJ/mol

Low frequencies: 41.52 47.04 76.01

Cartesian coordinates:

|    |          |          |          |
|----|----------|----------|----------|
| C  | 0.01550  | -0.01880 | 0.04101  |
| C  | -0.02156 | 0.13108  | 4.60828  |
| N  | 0.55406  | -0.02002 | 3.47065  |
| C  | 1.55314  | -1.07195 | 3.07744  |
| C  | 1.12386  | -1.58690 | 1.68296  |
| C  | 1.11238  | -0.48135 | 0.65670  |
| H  | -0.97200 | -0.43297 | 0.23971  |
| H  | 0.07318  | 0.75617  | -0.71838 |
| H  | 0.26294  | -0.57109 | 5.39257  |
| H  | 0.09392  | -1.95939 | 1.79520  |
| H  | 2.07687  | -0.04930 | 0.38964  |
| Si | 2.09595  | -3.16482 | 1.04749  |
| C  | 2.41532  | -4.29250 | 2.53153  |
| H  | 3.10835  | -3.85723 | 3.26184  |
| H  | 1.48892  | -4.55706 | 3.05628  |
| H  | 2.86600  | -5.23198 | 2.18923  |
| C  | 0.93927  | -3.99142 | -0.18637 |
| H  | 0.01555  | -4.34065 | 0.29020  |
| H  | 0.66224  | -3.31026 | -0.99895 |
| H  | 1.42381  | -4.86420 | -0.63980 |
| C  | 3.71318  | -2.66754 | 0.21209  |
| H  | 4.20739  | -3.56445 | -0.18109 |
| H  | 3.54317  | -1.99707 | -0.63811 |
| H  | 4.42561  | -2.18083 | 0.88771  |
| H  | 1.44398  | -1.86983 | 3.81820  |
| H  | 0.30526  | 0.60483  | 2.69277  |
| C  | 2.95444  | -0.45876 | 3.18124  |
| H  | 3.70087  | -1.21427 | 2.92401  |
| H  | 3.08202  | 0.38855  | 2.50126  |
| H  | 3.15662  | -0.11657 | 4.20116  |
| C  | -1.02529 | 1.18019  | 4.90434  |
| H  | -1.23044 | 1.82524  | 4.04632  |
| H  | -1.95758 | 0.70657  | 5.23921  |
| H  | -0.67141 | 1.79076  | 5.74556  |

31B

Filename: int2\_TMS\_eqMeaxMe.out

B3LYP/6-31g\*: -738.34570329 Hartree

ZPE: 797.094 kJ/mol

DeltaG (excl. ZPE): -117.143 kJ/mol

Low frequencies: 39.54 52.00 74.54

Cartesian coordinates:

|   |          |          |          |
|---|----------|----------|----------|
| C | -0.01539 | -0.02749 | 0.09458  |
| C | -0.03214 | 0.04410  | 4.63209  |
| N | 0.54700  | -0.01646 | 3.48462  |
| C | 1.81284  | -0.71730 | 3.07026  |
| C | 1.55313  | -1.26058 | 1.64353  |
| C | 1.18164  | -0.15776 | 0.68457  |
| H | -0.81758 | -0.74528 | 0.26053  |
| H | -0.21707 | 0.77127  | -0.61378 |



|    |          |          |          |
|----|----------|----------|----------|
| H  | -0.97311 | 0.59415  | 4.65973  |
| H  | 0.69368  | -1.94365 | 1.72668  |
| H  | 1.95556  | 0.57414  | 0.45271  |
| Si | 2.96400  | -2.40990 | 0.91759  |
| C  | 3.65561  | -3.46428 | 2.32707  |
| H  | 4.19390  | -2.87718 | 3.08110  |
| H  | 2.87280  | -4.03933 | 2.83685  |
| H  | 4.37109  | -4.19067 | 1.92266  |
| C  | 2.10579  | -3.48684 | -0.36581 |
| H  | 1.35852  | -4.14746 | 0.08966  |
| H  | 1.60060  | -2.88115 | -1.12673 |
| H  | 2.83398  | -4.12302 | -0.88250 |
| C  | 4.32334  | -1.37577 | 0.11592  |
| H  | 5.07917  | -2.04384 | -0.31497 |
| H  | 3.93548  | -0.76022 | -0.70381 |
| H  | 4.84396  | -0.71359 | 0.81684  |
| H  | 1.93989  | -1.55703 | 3.75677  |
| H  | 0.09565  | 0.44868  | 2.68601  |
| C  | 2.98097  | 0.26406  | 3.22792  |
| H  | 3.91331  | -0.23611 | 2.95455  |
| H  | 2.86492  | 1.14234  | 2.58669  |
| H  | 3.07238  | 0.60505  | 4.26411  |
| C  | 0.45974  | -0.55411 | 5.89517  |
| H  | 1.41538  | -1.06960 | 5.80144  |
| H  | 0.54834  | 0.24141  | 6.64732  |
| H  | -0.29873 | -1.24959 | 6.27883  |

31C

Filename: int2\_TMS\_axMeeqMe.out

B3LYP/6-31g\*: -738.34690724 Hartree

ZPE: 796.747 kJ/mol

DeltaG (excl. ZPE): -116.074 kJ/mol

Low frequencies: 40.61 49.07 92.40

Cartesian coordinates:

|    |          |          |          |
|----|----------|----------|----------|
| C  | -0.16578 | 0.16183  | 0.03244  |
| C  | 0.55304  | -0.49659 | 4.37643  |
| N  | 0.49750  | 0.27178  | 3.34890  |
| C  | 1.39030  | 1.41956  | 2.95221  |
| C  | 1.64215  | 1.26337  | 1.42987  |
| C  | 0.31672  | 1.21391  | 0.70743  |
| H  | 0.39774  | -0.76507 | -0.06346 |
| H  | -1.11618 | 0.21014  | -0.49194 |
| H  | 1.32761  | -0.28878 | 5.11126  |
| H  | 2.17295  | 0.31244  | 1.27125  |
| H  | -0.28452 | 2.12531  | 0.74925  |
| Si | 2.77240  | 2.65360  | 0.62283  |
| C  | 4.58959  | 2.28998  | 0.98729  |
| H  | 4.87154  | 2.40414  | 2.03900  |
| H  | 4.86579  | 1.27606  | 0.67342  |
| H  | 5.21403  | 2.98413  | 0.41132  |
| C  | 2.48833  | 2.56458  | -1.23619 |
| H  | 2.69573  | 1.56314  | -1.63102 |
| H  | 1.46293  | 2.82618  | -1.51704 |
| H  | 3.16107  | 3.26425  | -1.74664 |
| C  | 2.24317  | 4.33504  | 1.30492  |
| H  | 2.81706  | 5.12801  | 0.81023  |
| H  | 1.18357  | 4.54331  | 1.11277  |
| H  | 2.41702  | 4.44350  | 2.38232  |
| H  | 0.76695  | 2.30858  | 3.11494  |
| C  | 2.62127  | 1.49174  | 3.84610  |
| H  | 3.20340  | 2.37394  | 3.57654  |
| H  | 2.35854  | 1.60352  | 4.90377  |
| H  | 3.26531  | 0.61391  | 3.72322  |

|   |          |          |         |
|---|----------|----------|---------|
| H | -0.20989 | 0.07705  | 2.62624 |
| C | -0.37043 | -1.63390 | 4.60566 |
| H | -1.10955 | -1.74899 | 3.80883 |
| H | 0.21219  | -2.55949 | 4.70202 |
| H | -0.88492 | -1.49330 | 5.56527 |

31D

Filename: int2\_TMS\_axMeaxMe.out

B3LYP/6-31g\*: -738.34192867 Hartree

ZPE: 796.445 kJ/mol

DeltaG (excl. ZPE): -118.786 kJ/mol

Low frequencies: 19.29 43.60 61.90

Cartesian coordinates:

|    |          |          |          |
|----|----------|----------|----------|
| C  | -0.05745 | 0.18556  | -0.04385 |
| C  | -0.03053 | 0.15602  | 4.42013  |
| N  | 0.60894  | 0.16784  | 3.30325  |
| C  | 1.82299  | 0.97849  | 2.89752  |
| C  | 1.90130  | 0.96771  | 1.35159  |
| C  | 0.52853  | 1.10161  | 0.73865  |
| H  | 0.44384  | -0.74236 | -0.31487 |
| H  | -1.03860 | 0.35319  | -0.47919 |
| H  | -0.88998 | -0.51319 | 4.46671  |
| H  | 2.32294  | -0.00290 | 1.04774  |
| H  | -0.01285 | 2.02420  | 0.95886  |
| Si | 3.07205  | 2.33631  | 0.56730  |
| C  | 4.87671  | 2.07196  | 1.06536  |
| H  | 5.09711  | 2.38432  | 2.09238  |
| H  | 5.19806  | 1.03052  | 0.94709  |
| H  | 5.51276  | 2.67889  | 0.40896  |
| C  | 2.90607  | 2.15000  | -1.29805 |
| H  | 3.20107  | 1.14748  | -1.63084 |
| H  | 1.88387  | 2.32872  | -1.64604 |
| H  | 3.56213  | 2.86750  | -1.80509 |
| C  | 2.47220  | 4.02991  | 1.15321  |
| H  | 3.07439  | 4.81580  | 0.68123  |
| H  | 1.42759  | 4.22210  | 0.88189  |
| H  | 2.57221  | 4.16583  | 2.23747  |
| H  | 1.62653  | 1.99162  | 3.26400  |
| C  | 3.05653  | 0.38399  | 3.58714  |
| H  | 3.93702  | 0.97365  | 3.32687  |
| H  | 2.96071  | 0.38516  | 4.67698  |
| H  | 3.22846  | -0.64491 | 3.25507  |
| H  | 0.22464  | -0.39038 | 2.53419  |
| C  | 0.28773  | 0.96318  | 5.62060  |
| H  | 1.08723  | 1.68793  | 5.46890  |
| H  | -0.62346 | 1.47814  | 5.95061  |
| H  | 0.56517  | 0.28464  | 6.43968  |

31E

Filename: int2\_MeTMS\_eqMeeqMe\_f.out

B3LYP/6-31g\*: -777.65541078 Hartree

ZPE: 871.138 kJ/mol

DeltaG (excl. ZPE): -122.582 kJ/mol

Low frequencies: 25.64 47.75 54.28

Cartesian coordinates:

|   |         |          |          |
|---|---------|----------|----------|
| C | 4.44570 | 2.14423  | -0.24407 |
| C | 2.73900 | -2.56993 | -0.42837 |
| N | 2.42430 | -1.34808 | -0.15621 |
| C | 2.70741 | -0.79115 | 1.23914  |
| C | 3.93285 | 0.15151  | 1.22162  |
| C | 3.69992 | 1.54054  | 0.68983  |
| H | 5.26968 | 1.63445  | -0.74035 |

|    |         |          |          |
|----|---------|----------|----------|
| H  | 4.27180 | 3.17801  | -0.52850 |
| H  | 3.19590 | -3.12316 | 0.39143  |
| H  | 4.70710 | -0.33567 | 0.60959  |
| H  | 2.90596 | 2.11518  | 1.16720  |
| Si | 4.80999 | 0.28457  | 2.97941  |
| C  | 4.75505 | -1.41663 | 3.80774  |
| H  | 3.74262 | -1.72513 | 4.09596  |
| H  | 5.18708 | -2.20341 | 3.17630  |
| H  | 5.34937 | -1.39029 | 4.72928  |
| C  | 6.58904 | 0.77970  | 2.61485  |
| H  | 7.12012 | 0.00723  | 2.04584  |
| H  | 6.63945 | 1.71393  | 2.04508  |
| H  | 7.13977 | 0.93403  | 3.55032  |
| C  | 3.96292 | 1.57713  | 4.06117  |
| H  | 4.51544 | 1.67901  | 5.00330  |
| H  | 3.95364 | 2.56361  | 3.58449  |
| H  | 2.93044 | 1.31880  | 4.32359  |
| H  | 2.97110 | -1.68390 | 1.81170  |
| C  | 1.80373 | -0.42672 | -1.13252 |
| H  | 1.96472 | -0.77940 | -2.14859 |
| H  | 0.73284 | -0.35907 | -0.92646 |
| H  | 2.26772 | 0.55280  | -1.01108 |
| C  | 1.41534 | -0.21526 | 1.82306  |
| H  | 1.59481 | 0.06078  | 2.86550  |
| H  | 1.07634 | 0.68210  | 1.30007  |
| H  | 0.61020 | -0.95685 | 1.80808  |
| C  | 2.55607 | -3.30921 | -1.70260 |
| H  | 2.01496 | -2.76920 | -2.47808 |
| H  | 3.54337 | -3.60238 | -2.08560 |
| H  | 2.02639 | -4.24541 | -1.48337 |

31F

Filename: int2\_MeTMS\_eqMeaxMe\_f.out

B3LYP/6-31g\*: -777.65447471 Hartree

ZPE: 871.753 kJ/mol

DeltaG (excl. ZPE): -121.487 kJ/mol

Low frequencies: 28.82 46.92 53.57

Cartesian coordinates:

|    |         |          |          |
|----|---------|----------|----------|
| C  | 4.52322 | 1.88770  | -0.38624 |
| C  | 2.83084 | -2.55750 | -0.47162 |
| N  | 2.40992 | -1.40610 | -0.06378 |
| C  | 2.70571 | -0.84598 | 1.32366  |
| C  | 3.95124 | 0.07376  | 1.27421  |
| C  | 3.75603 | 1.40508  | 0.59898  |
| H  | 5.34025 | 1.30970  | -0.81448 |
| H  | 4.37670 | 2.88863  | -0.78192 |
| H  | 2.56004 | -2.81892 | -1.49387 |
| H  | 4.73416 | -0.47783 | 0.73181  |
| H  | 2.97068 | 2.04446  | 1.00302  |
| Si | 4.77407 | 0.36043  | 3.03744  |
| C  | 4.64580 | -1.24656 | 4.03057  |
| H  | 3.61463 | -1.51859 | 4.28696  |
| H  | 5.10631 | -2.09644 | 3.51039  |
| H  | 5.18491 | -1.13086 | 4.97888  |
| C  | 6.57757 | 0.76983  | 2.68504  |
| H  | 7.10552 | -0.06999 | 2.21768  |
| H  | 6.67106 | 1.63780  | 2.02318  |
| H  | 7.10291 | 1.00863  | 3.61736  |
| C  | 3.93773 | 1.78049  | 3.95501  |
| H  | 4.45843 | 1.95423  | 4.90470  |
| H  | 3.98741 | 2.71500  | 3.38502  |
| H  | 2.88620 | 1.58890  | 4.19731  |
| H  | 2.95058 | -1.72363 | 1.91982  |

|   |         |          |          |
|---|---------|----------|----------|
| C | 1.64303 | -0.54020 | -0.99008 |
| H | 1.60129 | -1.00753 | -1.97435 |
| H | 0.63221 | -0.40514 | -0.60244 |
| H | 2.15004 | 0.42455  | -1.05354 |
| C | 1.43456 | -0.23318 | 1.91846  |
| H | 1.62651 | 0.00072  | 2.96873  |
| H | 1.13211 | 0.69359  | 1.42590  |
| H | 0.59954 | -0.94049 | 1.88654  |
| C | 3.63516 | -3.56408 | 0.26776  |
| H | 3.99380 | -3.24900 | 1.24594  |
| H | 3.03397 | -4.47708 | 0.38051  |
| H | 4.49361 | -3.84300 | -0.35652 |

31G

Filename: int2\_MeTMS\_axMeeqMe\_f.out

B3LYP/6-31g\*: -777.65583551 Hartree

ZPE: 870.607 kJ/mol

DeltaG (excl. ZPE): -122.761 kJ/mol

Low frequencies: 37.55 45.97 54.25

Cartesian coordinates:

|    |          |          |          |
|----|----------|----------|----------|
| C  | 3.89104  | -2.45553 | -0.54365 |
| C  | 3.01475  | 0.54932  | 1.10837  |
| N  | 1.84628  | 0.08716  | 0.81118  |
| C  | 1.31772  | -1.13923 | 1.54129  |
| C  | 1.69664  | -2.39977 | 0.72360  |
| C  | 3.19368  | -2.50771 | 0.59691  |
| H  | 3.40490  | -2.32047 | -1.50840 |
| H  | 4.96907  | -2.59080 | -0.55875 |
| H  | 3.50745  | 0.05681  | 1.94373  |
| H  | 1.25431  | -2.31772 | -0.28074 |
| H  | 3.73871  | -2.66894 | 1.53067  |
| Si | 1.00098  | -4.09632 | 1.43959  |
| C  | -0.83904 | -4.25889 | 1.04363  |
| H  | -1.47940 | -3.55545 | 1.58466  |
| H  | -1.03070 | -4.13423 | -0.02917 |
| H  | -1.17257 | -5.26924 | 1.31104  |
| C  | 1.93653  | -5.47228 | 0.55808  |
| H  | 1.83791  | -5.39627 | -0.53117 |
| H  | 3.00526  | -5.47073 | 0.79461  |
| H  | 1.52978  | -6.44592 | 0.85712  |
| C  | 1.32721  | -4.15353 | 3.30072  |
| H  | 1.00529  | -5.12309 | 3.69974  |
| H  | 2.39438  | -4.05361 | 3.53359  |
| H  | 0.78631  | -3.38347 | 3.86379  |
| H  | 1.87730  | -1.15297 | 2.48214  |
| C  | -0.16347 | -0.94071 | 1.86603  |
| H  | -0.47060 | -1.70014 | 2.58756  |
| H  | -0.33895 | 0.03699  | 2.32684  |
| H  | -0.80716 | -1.04119 | 0.98782  |
| C  | 1.02781  | 0.60200  | -0.30541 |
| H  | 0.26036  | 1.27398  | 0.08632  |
| H  | 1.64795  | 1.12618  | -1.02864 |
| H  | 0.54754  | -0.24216 | -0.79983 |
| C  | 3.74666  | 1.67738  | 0.47963  |
| H  | 3.20179  | 2.20637  | -0.30083 |
| H  | 4.02349  | 2.39098  | 1.26649  |
| H  | 4.68971  | 1.29351  | 0.06853  |

31H

Filename: int2\_MeTMS\_axMeaxMe\_f.out

B3LYP/6-31g\*: -777.65413084 Hartree

ZPE: 871.042 kJ/mol

DeltaG (excl. ZPE): -122.036 kJ/mol

Low frequencies: 30.96 40.92 60.86

Cartesian coordinates:

|    |          |          |          |
|----|----------|----------|----------|
| C  | 3.81556  | -2.51199 | -0.63510 |
| C  | 3.05433  | 0.59182  | 1.33408  |
| N  | 1.94586  | 0.04977  | 0.95271  |
| C  | 1.33376  | -1.19011 | 1.58553  |
| C  | 1.67382  | -2.42443 | 0.71148  |
| C  | 3.16324  | -2.56543 | 0.53058  |
| H  | 3.29612  | -2.34782 | -1.57771 |
| H  | 4.88879  | -2.66986 | -0.69563 |
| H  | 3.39656  | 1.42811  | 0.72557  |
| H  | 1.20310  | -2.30225 | -0.27495 |
| H  | 3.73844  | -2.75840 | 1.43931  |
| Si | 0.95382  | -4.12423 | 1.39655  |
| C  | -0.89211 | -4.25153 | 1.01457  |
| H  | -1.51920 | -3.55953 | 1.58526  |
| H  | -1.09436 | -4.08926 | -0.05118 |
| H  | -1.23411 | -5.26642 | 1.25254  |
| C  | 1.85810  | -5.49950 | 0.48260  |
| H  | 1.75364  | -5.39912 | -0.60408 |
| H  | 2.92829  | -5.52295 | 0.71089  |
| H  | 1.43415  | -6.47078 | 0.76502  |
| C  | 1.28821  | -4.22164 | 3.25526  |
| H  | 0.95101  | -5.19254 | 3.63806  |
| H  | 2.35788  | -4.14491 | 3.48598  |
| H  | 0.76117  | -3.45332 | 3.83405  |
| H  | 1.83403  | -1.29374 | 2.54829  |
| C  | -0.15410 | -0.93810 | 1.84534  |
| H  | -0.52793 | -1.71030 | 2.52032  |
| H  | -0.31434 | 0.02839  | 2.33469  |
| H  | -0.75303 | -0.98008 | 0.93130  |
| C  | 1.24994  | 0.58710  | -0.23867 |
| H  | 0.29927  | 1.02683  | 0.06786  |
| H  | 1.87038  | 1.34652  | -0.71429 |
| H  | 1.06523  | -0.22595 | -0.94165 |
| C  | 3.91062  | 0.25074  | 2.49767  |
| H  | 3.54558  | -0.55737 | 3.12804  |
| H  | 4.90883  | -0.01090 | 2.12350  |
| H  | 4.03808  | 1.15645  | 3.10522  |

32A

Filename: prod\_TMS\_eqMeeqMe.out

B3LYP/6-31g\*: -329.30505165 Hartree

ZPE: 502.800 kJ/mol

DeltaG (excl. ZPE): -84.269 kJ/mol

Low frequencies: 110.09 159.21 245.25

Cartesian coordinates:

|   |          |          |          |
|---|----------|----------|----------|
| C | -0.18777 | -0.01685 | -0.77190 |
| C | -1.39321 | 0.52325  | -0.56857 |
| H | -2.28586 | 0.01418  | -0.93035 |
| H | -0.09527 | -0.97956 | -1.27472 |
| C | 1.09654  | 0.65527  | -0.32327 |
| H | 1.47820  | 0.11475  | 0.55948  |
| C | -1.58696 | 1.82787  | 0.16688  |
| H | -1.88821 | 2.61927  | -0.54035 |
| H | -2.42058 | 1.73742  | 0.87889  |
| C | -0.30134 | 2.25174  | 0.90739  |
| H | -0.18496 | 1.59264  | 1.78008  |
| N | 0.90520  | 2.05510  | 0.08877  |
| H | 0.80934  | 2.62279  | -0.75683 |
| C | 2.18245  | 0.59140  | -1.40372 |
| H | 3.09268  | 1.08782  | -1.05203 |

|   |          |          |          |
|---|----------|----------|----------|
| H | 2.42398  | -0.44642 | -1.65784 |
| H | 1.84752  | 1.09070  | -2.32220 |
| C | -0.35937 | 3.69931  | 1.39417  |
| H | 0.54847  | 3.95299  | 1.95012  |
| H | -0.44102 | 4.39168  | 0.54533  |
| H | -1.22857 | 3.86470  | 2.04134  |

32B

Filename: prod\_TMS\_eqMeaxMe.out

B3LYP/6-31g\*: -329.30363227 Hartree  
 ZPE: 503.218 kJ/mol  
 DeltaG (excl. ZPE): -84.158 kJ/mol  
 Low frequencies: 116.19 151.37 234.47  
 Cartesian coordinates:

|   |          |          |          |
|---|----------|----------|----------|
| C | 1.07516  | -0.76786 | 0.68521  |
| C | -0.08508 | -0.17656 | 0.98578  |
| H | -1.02408 | -0.62781 | 0.66766  |
| H | 1.08627  | -1.68717 | 0.09983  |
| C | 2.41852  | -0.21656 | 1.11948  |
| H | 2.96537  | -1.01904 | 1.63614  |
| C | -0.16074 | 1.11898  | 1.75762  |
| H | -0.91446 | 1.78195  | 1.30820  |
| H | -0.51171 | 0.92656  | 2.78596  |
| C | 1.20857  | 1.82584  | 1.79744  |
| H | 1.40156  | 2.23236  | 0.79537  |
| N | 2.31020  | 0.89274  | 2.08832  |
| H | 2.14167  | 0.49447  | 3.01320  |
| C | 3.27904  | 0.20516  | -0.08606 |
| H | 4.26466  | 0.53562  | 0.25633  |
| H | 3.40826  | -0.62902 | -0.78582 |
| H | 2.81022  | 1.02893  | -0.63541 |
| C | 1.24394  | 2.97949  | 2.79934  |
| H | 0.45472  | 3.71046  | 2.58839  |
| H | 1.09086  | 2.61162  | 3.82303  |
| H | 2.21311  | 3.48675  | 2.76488  |

32C

Filename: prod\_TMS\_axMeeqMe.out

B3LYP/6-31g\*: -329.30363575 Hartree  
 ZPE: 503.159 kJ/mol  
 DeltaG (excl. ZPE): -84.156 kJ/mol  
 Low frequencies: 116.82 151.62 234.18  
 Cartesian coordinates:

|   |          |          |          |
|---|----------|----------|----------|
| C | -2.77689 | 2.90060  | 1.78326  |
| C | -2.49550 | 2.43147  | 0.56388  |
| H | -3.03754 | 2.80855  | -0.30245 |
| H | -3.52931 | 3.67873  | 1.91093  |
| C | -2.08721 | 2.40283  | 3.03773  |
| H | -2.86329 | 2.10147  | 3.75665  |
| C | -1.43502 | 1.38447  | 0.32089  |
| H | -0.84639 | 1.64424  | -0.57109 |
| H | -1.90734 | 0.41400  | 0.09115  |
| C | -0.50643 | 1.23656  | 1.54237  |
| H | 0.13526  | 2.12727  | 1.58132  |
| N | -1.25366 | 1.20500  | 2.81105  |
| H | -1.86624 | 0.38852  | 2.78856  |
| C | -1.26034 | 3.51275  | 3.71301  |
| H | -1.88421 | 4.38727  | 3.93259  |
| H | -0.83027 | 3.14115  | 4.64834  |
| H | -0.44201 | 3.84397  | 3.06429  |
| C | 0.38982  | 0.00189  | 1.45140  |
| H | 1.06717  | -0.04345 | 2.30984  |

|   |          |          |         |
|---|----------|----------|---------|
| H | -0.21192 | -0.91713 | 1.44634 |
| H | 0.98560  | 0.01297  | 0.53129 |

32D

Filename: prod\_TMS\_axMeaxMe.out

B3LYP/6-31g\*: -329.30505415 Hartree

ZPE: 502.871 kJ/mol

DeltaG (excl. ZPE): -84.272 kJ/mol

Low frequencies: 109.30 158.84 245.27

Cartesian coordinates:

|   |          |          |          |
|---|----------|----------|----------|
| C | -0.54827 | 1.65494  | -1.43831 |
| C | -1.68472 | 2.00654  | -0.82919 |
| H | -2.43085 | 2.59228  | -1.36496 |
| H | -0.35196 | 1.97542  | -2.46152 |
| C | 0.51677  | 0.81263  | -0.76103 |
| H | 1.36322  | 1.47082  | -0.50141 |
| C | -1.98887 | 1.63613  | 0.60287  |
| H | -2.77911 | 0.86687  | 0.63464  |
| H | -2.40307 | 2.50483  | 1.13565  |
| C | -0.72913 | 1.12030  | 1.32939  |
| H | -0.07701 | 1.98446  | 1.52304  |
| N | 0.05834  | 0.19877  | 0.49552  |
| H | -0.53609 | -0.59935 | 0.25854  |
| C | 1.05614  | -0.28148 | -1.68981 |
| H | 1.50212  | 0.15249  | -2.59134 |
| H | 1.81743  | -0.87334 | -1.17140 |
| H | 0.24957  | -0.95503 | -2.00742 |
| C | -1.05845 | 0.44977  | 2.66266  |
| H | -0.14118 | 0.13445  | 3.16942  |
| H | -1.61118 | 1.12941  | 3.32165  |
| H | -1.68193 | -0.44092 | 2.50610  |

32E

Filename: prod\_MeTMS\_eqMeeqMe.out

B3LYP/6-31g\*: -368.60867840 Hartree

ZPE: 576.626 kJ/mol

DeltaG (excl. ZPE): -88.712 kJ/mol

Low frequencies: 67.04 134.46 203.43

Cartesian coordinates:

|   |          |          |          |
|---|----------|----------|----------|
| C | 1.37102  | -0.73628 | 1.72942  |
| C | 0.15648  | -1.20064 | 2.01951  |
| H | 0.03829  | -2.12006 | 2.59065  |
| H | 2.26235  | -1.26471 | 2.06423  |
| C | 1.62793  | 0.48825  | 0.88607  |
| H | 2.16405  | 1.22679  | 1.52077  |
| C | -1.07552 | -0.45710 | 1.59361  |
| H | -1.83420 | -0.49195 | 2.38772  |
| H | -1.52993 | -0.93345 | 0.71108  |
| C | -0.76285 | 1.01298  | 1.27512  |
| H | -0.51677 | 1.51833  | 2.23255  |
| N | 0.38701  | 1.09205  | 0.35119  |
| C | 2.57065  | 0.08801  | -0.26753 |
| H | 3.48912  | -0.35871 | 0.13051  |
| H | 2.07405  | -0.64590 | -0.91007 |
| H | 2.86326  | 0.94356  | -0.88357 |
| C | 0.64134  | 2.46245  | -0.09060 |
| H | 1.52822  | 2.49085  | -0.72720 |
| H | -0.19317 | 2.83674  | -0.68779 |
| H | 0.80827  | 3.16278  | 0.75214  |
| C | -2.01240 | 1.68334  | 0.68972  |
| H | -2.88158 | 1.44366  | 1.31254  |
| H | -1.93214 | 2.77329  | 0.64903  |

H           -2.20438           1.31052           -0.32352

32F

Filename: prod\_MeTMS\_eqMeaxMe\_f.out

B3LYP/6-31g\*:       -368.60799039 Hartree

ZPE:                   576.923 kJ/mol

DeltaG (excl. ZPE):   -87.955 kJ/mol

Low frequencies: 108.22 136.27 210.20

Cartesian coordinates:

|   |          |          |          |
|---|----------|----------|----------|
| C | -1.40030 | 0.65744  | -0.78875 |
| C | -1.84427 | 1.85482  | -1.18412 |
| H | -2.84768 | 1.95531  | -1.59617 |
| H | -2.03039 | -0.22463 | -0.90134 |
| C | -0.02460 | 0.44342  | -0.18333 |
| H | -0.15248 | -0.13797 | 0.74071  |
| C | -0.99799 | 3.10020  | -1.08823 |
| H | -1.37735 | 3.75826  | -0.28988 |
| H | -1.08085 | 3.68553  | -2.01532 |
| C | 0.48058  | 2.73796  | -0.83449 |
| H | 0.85562  | 2.27278  | -1.75515 |
| N | 0.63540  | 1.70547  | 0.21208  |
| C | 0.88233  | -0.39542 | -1.10436 |
| H | 1.07449  | 0.11592  | -2.05349 |
| H | 1.84197  | -0.58369 | -0.61254 |
| H | 0.41129  | -1.35759 | -1.33850 |
| C | 0.22629  | 2.13706  | 1.54856  |
| H | -0.85196 | 2.35429  | 1.65296  |
| H | 0.47750  | 1.34790  | 2.26591  |
| H | 0.78475  | 3.03067  | 1.84100  |
| C | 1.35351  | 3.96692  | -0.56906 |
| H | 2.38048  | 3.66127  | -0.34269 |
| H | 1.37131  | 4.61346  | -1.45391 |
| H | 0.98144  | 4.56995  | 0.26688  |

32G

Filename: prod\_MeTMS\_axMeeqMe\_f.out

B3LYP/6-31g\*:       -368.60798981 Hartree

ZPE:                   576.932 kJ/mol

DeltaG (excl. ZPE):   -87.948 kJ/mol

Low frequencies: 108.36 136.56 209.71

Cartesian coordinates:

|   |         |          |          |
|---|---------|----------|----------|
| C | 1.52197 | 1.55848  | -0.91780 |
| C | 1.07356 | 1.11010  | 0.25906  |
| H | 0.72819 | 1.81437  | 1.01500  |
| H | 1.51908 | 2.62669  | -1.13384 |
| C | 2.04139 | 0.64046  | -2.00974 |
| H | 3.01193 | 1.03365  | -2.34389 |
| C | 1.01807 | -0.36011 | 0.59343  |
| H | 0.05927 | -0.60228 | 1.07409  |
| H | 1.79167 | -0.61135 | 1.33689  |
| C | 1.19099 | -1.21666 | -0.67866 |
| H | 0.28206 | -1.08047 | -1.27863 |
| N | 2.29597 | -0.73591 | -1.53489 |
| C | 1.12101 | 0.64260  | -3.24560 |
| H | 1.55502 | 0.02126  | -4.03542 |
| H | 0.12590 | 0.25300  | -3.00643 |
| H | 0.99181 | 1.66163  | -3.62948 |
| C | 3.62346 | -0.86695 | -0.93453 |
| H | 3.80956 | -1.90923 | -0.66076 |
| H | 4.37635 | -0.58757 | -1.67989 |
| H | 3.78873 | -0.24023 | -0.03976 |
| C | 1.30332 | -2.71244 | -0.37389 |



|   |         |          |          |
|---|---------|----------|----------|
| H | 0.37488 | -3.07358 | 0.08312  |
| H | 1.47706 | -3.27580 | -1.29680 |
| H | 2.11780 | -2.93567 | 0.32442  |

32H

Filename: prod\_MeTMS\_axMeaxMe.out

B3LYP/6-31g\*: -368.60867815 Hartree

ZPE: 576.702 kJ/mol

DeltaG (excl. ZPE): -88.726 kJ/mol

Low frequencies: 66.12 134.47 202.95

Cartesian coordinates:

|   |          |          |          |
|---|----------|----------|----------|
| C | -1.40634 | 1.15057  | 3.46705  |
| C | -1.98228 | 1.81226  | 2.46439  |
| H | -2.50669 | 2.74839  | 2.64923  |
| H | -1.45744 | 1.53149  | 4.48584  |
| C | -0.60116 | -0.11357 | 3.29243  |
| H | -1.11363 | -0.91958 | 3.86123  |
| C | -1.94737 | 1.27351  | 1.06400  |
| H | -1.19170 | 1.80339  | 0.46368  |
| H | -2.91209 | 1.44469  | 0.56656  |
| C | -1.64554 | -0.23283 | 1.04863  |
| H | -2.53076 | -0.75606 | 1.46712  |
| N | -0.45401 | -0.51328 | 1.87549  |
| C | 0.78380  | 0.10670  | 3.93534  |
| H | 0.67205  | 0.40469  | 4.98425  |
| H | 1.40158  | -0.79615 | 3.91586  |
| H | 1.31528  | 0.90007  | 3.40044  |
| C | -0.04034 | -1.91255 | 1.78505  |
| H | -0.84545 | -2.61949 | 2.06924  |
| H | 0.28597  | -2.15387 | 0.77098  |
| H | 0.80977  | -2.09390 | 2.44616  |
| C | -1.45777 | -0.69886 | -0.40087 |
| H | -0.51284 | -0.31559 | -0.80426 |
| H | -1.46235 | -1.78778 | -0.50262 |
| H | -2.27540 | -0.31048 | -1.01845 |

Me<sub>3</sub>Si<sup>+</sup>

Filename: silylcation\_f.out

B3LYP/6-31g\*: -408.98270655 Hartree

ZPE: 288.240 kJ/mol

DeltaG (excl. ZPE): -84.821 kJ/mol

Low frequencies: -56.55 23.34 30.30

Cartesian coordinates:

|    |         |          |          |
|----|---------|----------|----------|
| Si | 3.36259 | -0.66932 | -1.69297 |
| C  | 4.65374 | -1.84446 | -1.09824 |
| H  | 5.11497 | -1.51724 | -0.16162 |
| H  | 4.25012 | -2.85696 | -0.97636 |
| H  | 5.44882 | -1.91634 | -1.85790 |
| C  | 2.19064 | -1.21121 | -3.00975 |
| H  | 1.79600 | -2.21344 | -2.79950 |
| H  | 1.36084 | -0.51176 | -3.14587 |
| H  | 2.73308 | -1.28839 | -3.96552 |
| C  | 3.31576 | 1.05166  | -1.03350 |
| H  | 4.10283 | 1.64195  | -1.53136 |
| H  | 2.35929 | 1.54763  | -1.22429 |
| H  | 3.54048 | 1.07665  | 0.03940  |

**Experimental and quantum-mechanical investigation  
of the vinylsilane-iminium ion cyclization**

Lisbet Kværnø, Per-Ola Norrby and David Tanner\*

**Electronic Supplementary Information**

**Experimental**

**General Methods.** Reactions were conducted under atmospheres of argon or nitrogen when anhydrous solvents were used. Anhydrous solvents were either distilled from appropriate drying agents immediately before use or dried by storage over activated molecular sieves. All reagents were obtained from commercial suppliers and were used without further purification unless otherwise stated. After column chromatography which was performed using dry column vacuum chromatography,<sup>S1</sup> fractions containing product were pooled, the solvents were evaporated under reduced pressure and the residue was dried under high vacuum to give the product. Silica gel 60 (15-40  $\mu\text{m}$ ) was purchased from Merck Eurolab.  $^1\text{H}$  NMR spectra were recorded at 300 MHz and  $^{13}\text{C}$  NMR spectra were recorded at 75.5 MHz unless otherwise stated. Chemical shifts are reported in ppm relative to the deuterated solvent as the internal standard for  $^1\text{H}$  and  $^{13}\text{C}$  and NMR assignments are all based on 2D spectra except for compounds **11A** and **11B**. Coupling constants  $J$  are given in Hz. Electron impact ionization mass spectra by direct inlet (EI) was recorded in positive ion mode. Microanalyses were performed by The Microanalytical Laboratory, Department of Physical Chemistry, University of Vienna, Austria. Column chromatographic purification of cyclization products **11A**, **11B**, **12**, **13** and **14** proved troublesome, which is both ascribed to the tendency of the reacting aldehydes to undergo aldol condensation and polymerizations and to slight instability of the cyclized products.

### 6-Benzyloxy-4-hydroxy-1-C-trimethylsilyl-1-hexyne **4**<sup>S2,S3</sup>

HC≡CSiMe<sub>3</sub> (7.812 g, 79.5 mmol) was dissolved in anhydrous THF (80 cm<sup>3</sup>) at -78°C, *n*-BuLi (1.6M, 49 cm<sup>3</sup>, 78 mmol) was slowly added and the solution was stirred for 35 min. BF<sub>3</sub>·Et<sub>2</sub>O (10.5 cm<sup>3</sup>, 83 mmol) was added dropwise and after 10 min, **3**<sup>S4</sup> (4.700 g, 26.4 mmol) was added dropwise and the solution was stirred at -78°C for 1 h. Sat. aq. NH<sub>4</sub>Cl (300 cm<sup>3</sup>) was added and the mixture was extracted with EtOAc (4 x 100 cm<sup>3</sup>). The combined organic phase was washed successively with sat. aq. NaHCO<sub>3</sub> (100 cm<sup>3</sup>) and H<sub>2</sub>O (100 cm<sup>3</sup>), dried (MgSO<sub>4</sub>), celite was added and the solvents were evaporated under reduced pressure. The solid residue was applied to dry column vacuum chromatography (5.2 x 5.5 cm) on silica gel eluting with a gradient of 0-25% EtOAc in hexane (v/v) to give alkyne **4** (8.079 g, quant.) as a colourless oil. R<sub>f</sub> (1:1 EtOAc/hexane (v/v)) 0.61; *m/z* (EI) 275 [M-H]<sup>+</sup>, 91 [C<sub>5</sub>H<sub>6</sub>CH<sub>2</sub>]<sup>+</sup>; δ<sub>H</sub> (CDCl<sub>3</sub>) 7.31-7.19 (5 H, m, Bn), 4.46 (2 H, s, Bn), 3.90 (1 H, bs, 4-H), 3.71-3.55 (2 H, m, 6-H), 2.92 (1 H, bs, OH), 2.39 (1 H, d, *J* 2.4, 3'-H), 2.37 (1 H, d, *J* 2.8, 3''-H), 1.91-1.70 (2 H, m, 5-H), 0.09 (9 H, s, Si(CH<sub>3</sub>)<sub>3</sub>). δ<sub>C</sub> (CDCl<sub>3</sub>) 137.88, 128.40, 127.70, 127.60 (Bn), 103.31 (2-C), 87.11 (1-C), 73.26 (Bn), 69.37 (4-C), 68.48 (6-C), 35.37 (5-C), 28.60 (3-C), 0.08 (Si(CH<sub>3</sub>)<sub>3</sub>).

### 6-Benzyloxy-4-methanesulfonyloxy-1-C-trimethylsilyl-1-hexyne **4A**

**4** (301 mg, 1.09 mmol) was dissolved in anhydrous pyridine (5 cm<sup>3</sup>) at 0°C, MsCl (0.20 cm<sup>3</sup>, 2.6 mmol) was added and the solution was stirred at 0°C for 2.5 h. H<sub>2</sub>O (50 cm<sup>3</sup>) was added, the solution was extracted with EtOAc (4 x 30 cm<sup>3</sup>) and the combined organic phase was washed successively with sat. aq. NaHCO<sub>3</sub> (20 cm<sup>3</sup>) and H<sub>2</sub>O (20 cm<sup>3</sup>), dried (MgSO<sub>4</sub>) and evaporated to dryness under reduced pressure. The residue was purified by dry column vacuum chromatography (5.1 x 3.3 cm) on silica gel eluting with a gradient of 0-25% EtOAc in hexane (v/v) to give mesylate **4A** (343 mg, 89%) as a colourless oil. R<sub>f</sub> (1:9 EtOAc/CH<sub>2</sub>Cl<sub>2</sub> (v/v)) 0.82; IR (neat) ν 2180 cm<sup>-1</sup>

(medium, sharp);  $\delta_{\text{H}}$  ( $\text{CDCl}_3$ ) 7.28-7.18 (5 H, m, Bn), 4.89-4.81 (1 H, m, 4-H), 4.45 (1 H, d,  $J$  11.9, Bn), 4.41 (1 H, d,  $J$  11.7, Bn), 3.54 (2 H, t,  $J$  4.9, 6-H), 2.95 (3 H, s, Ms), 2.64 (2 H, d,  $J$  5.9, 3-H), 2.11-1.91 (2 H, m, 5-H), 0.08 (9 H, s,  $\text{Si}(\underline{\text{C}}\text{H}_3)_3$ ).  $\delta_{\text{C}}$  ( $\text{CDCl}_3$ ) 137.93, 128.39, 127.73, 127.69 (Bn), 101.03 (2-C), 88.11 (1-C), 78.12 (4-C), 73.04 (Bn), 65.49 (6-C), 38.36 (Ms), 34.18 (5-C), 26.68 (3-C), -0.08 ( $\text{Si}(\underline{\text{C}}\text{H}_3)_3$ ).

#### 4-Azido-6-benzyloxy-1-C-trimethylsilyl-1-hexyne 4B

**4** (1177 mg, 4.26 mmol) was converted into mesylate **4A** as described above and crude **4A** (1418 mg, 94%) was dissolved in anhydrous DMSO (20  $\text{cm}^3$ ),  $\text{NaN}_3$  (2.512 g, 38.6 mmol) was added and the suspension was stirred at 60°C for 15 h. The reaction mixture was cooled and, after addition of  $\text{H}_2\text{O}$  (100  $\text{cm}^3$ ), extracted with 1:1 hexane/EtOAc ((v/v), 4 x 70  $\text{cm}^3$ ). The combined organic phase was washed successively with sat. aq.  $\text{NaHCO}_3$  (70  $\text{cm}^3$ ) and  $\text{H}_2\text{O}$  (70  $\text{cm}^3$ ), dried ( $\text{MgSO}_4$ ) and evaporated to dryness under reduced pressure. The residue was purified by dry column vacuum chromatography (5.5 x 5.5 cm) on silica gel eluting with a gradient of 0-20% EtOAc in hexane (v/v) to give a 86:14 mixture of azide **4B** and conjugated enynes **4C** (923 mg, 70% **4B**) as a colourless oil.  $R_f$  (1:3 EtOAc/hexane (v/v)) 0.54; IR (neat)  $\nu$  2179  $\text{cm}^{-1}$  (medium, sharp), 2102  $\text{cm}^{-1}$  (strong);  $m/z$  (EI) 300  $[\text{M}-\text{H}]^+$ , 162  $[\text{M}-\text{Me}_3\text{SiC}\equiv\text{CCH}_2]^+$ , 91  $[\text{C}_5\text{H}_6\text{CH}_2]^+$ ;  $\delta_{\text{H}}$  ( $\text{CDCl}_3$ , selected signals) 7.39-7.26 (5 H, m, Bn), 4.53 (2 H, s, Bn), 3.78-3.70 (1 H, m, 4-H), 3.66-3.55 (2 H, m, 6-H), 2.52 (1 H, d,  $J$  1.6, 3'-H), 2.50 (1 H, d,  $J$  2.2, 3''-H), 2.02-1.91 (1 H, m, 5'-H), 1.82-1.71 (1 H, m, 5''-H), 0.17 (9 H, s,  $\text{Si}(\underline{\text{C}}\text{H}_3)_3$ ).  $\delta_{\text{C}}$  ( $\text{CDCl}_3$ , selected signals) 138.13, 128.39, 127.63 (Bn), 102.07 (2-C), 87.96 (1-C), 73.09 (Bn), 66.47 (6-C), 58.03 (4-C), 33.85 (5-C), 26.48 (3-C), -0.10 ( $\text{Si}(\underline{\text{C}}\text{H}_3)_3$ ).

#### *cis*-4-Azido-6-benzyloxy-1-C-trimethylsilyl-1-hexene 5

BH<sub>3</sub>·THF (1M, 49 cm<sup>3</sup>, 49 mmol) was added to anhydrous THF (50 cm<sup>3</sup>) at 0°C, cyclohexene (10.0 cm<sup>3</sup>, 98.6 mmol) was added dropwise and the resulting slurry was stirred at 0°C for 75 min. Then **4B/4C** (84:16 **4B:4C**, 5.02 g, 17.0 mmol **4B**) dissolved in anhydrous THF (30 cm<sup>3</sup>) was added dropwise and the mixture was slowly heated to room temperature. After 14.5 h, the solution was cooled to 0°C, cyclohexene (5 cm<sup>3</sup>, 49.3 mmol) followed by AcOH (5 cm<sup>3</sup>, 70 mmol) were added dropwise and stirring was continued at room temperature for 2.5 h. The reaction mixture was poured into sat. aq. NaHCO<sub>3</sub> (300 cm<sup>3</sup>) and extracted with ether (4 x 100 cm<sup>3</sup>). The combined organic phase was washed successively with sat. aq. NaHCO<sub>3</sub> (100 cm<sup>3</sup>) and H<sub>2</sub>O (100 cm<sup>3</sup>), dried (MgSO<sub>4</sub>), celite was added and the solvents were evaporated under reduced pressure. The solid residue was applied to dry column vacuum chromatography (5.4 x 5.5 cm) on silica gel eluting with a gradient of 0-10% EtOAc in hexane (v/v) to give *cis*-olefin **5** (3.719 g, 84%) as a light yellow oil. R<sub>f</sub> (1:3 EtOAc/hexane (v/v)) 0.65; IR (neat) ν 2100 cm<sup>-1</sup> (strong, broad); *m/z* (EI) 275 [M-N<sub>2</sub>]<sup>+</sup>, 162 [M-Me<sub>3</sub>SiCH=CHCH<sub>2</sub>]<sup>+</sup>, 91 [C<sub>5</sub>H<sub>6</sub>CH<sub>2</sub>]<sup>+</sup>; δ<sub>H</sub> (CDCl<sub>3</sub>) 7.39-7.29 (5 H, m, Bn), 6.32 (1 H, dt, *J* 7.1 and 14.1, 2-H), 5.69 (1 H, dt, *J* 1.4 and 14.1, 1-H), 4.53 (2 H, s, Bn), 3.70-3.58 (3 H, m, 4-H, 6-H), 2.41 (2 H, tt, *J* 1.3 and 7.1, 3-H), 1.94-1.84 (1 H, m, 5'-H), 1.71 (1 H, ddd, *J* 4.7, 9.5 and 19.2, 5''-H), 0.15 (9 H, s, Si(CH<sub>3</sub>)<sub>3</sub>). δ<sub>C</sub> (CDCl<sub>3</sub>) 143.04 (2-C), 138.17 (Bn), 132.89 (1-C), 128.36, 127.66, 127.62, 73.15 (Bn), 66.69 (6-C), 59.77 (4-C), 38.39 (3-C), 34.43 (5-C), 0.14 (Si(CH<sub>3</sub>)<sub>3</sub>).

#### ***cis*-4-Amino-6-benzyloxy-1-C-trimethylsilyl-1-hexene 6**

**5** (158 mg, 0.521 mmol) was dissolved in anhydrous THF (10 cm<sup>3</sup>) at 0°C, LiAlH<sub>4</sub> (59 mg, 1.5 mmol) was added and the suspension was stirred at 0°C for 4.5 h and at room temperature for 19 h. Additional LiAlH<sub>4</sub> (29 mg, 0.76 mmol) was added and after stirring for 5 h, the suspension was cooled to 0°C and sat. aq. NHCO<sub>3</sub> (1 cm<sup>3</sup>) was carefully added. Celite was added and the solvents were evaporated under reduced pressure. The solid residue was applied to dry column vacuum chromatography (5.0 x 2.0 cm) on silica gel eluting with a gradient of 0-10% MeOH in CH<sub>2</sub>Cl<sub>2</sub>

(v/v) to give amine **6** (116 mg, 81%) as a colourless oil (Found: C, 69.0; H, 9.6; N, 4.8. Calc. for C<sub>16</sub>H<sub>27</sub>NOSi: C, 69.3; H, 9.8; N, 5.1%); R<sub>f</sub> (1:9 MeOH/CH<sub>2</sub>Cl<sub>2</sub> (v/v)) 0.24; *m/z* (EI) 278 [M+H]<sup>+</sup>, 276 [M-H]<sup>+</sup>, 262 [M-CH<sub>3</sub>]<sup>+</sup>, 164 [M-N<sub>2</sub>-Me<sub>3</sub>SiCH=CHCH<sub>2</sub>]<sup>+</sup>, 91 [C<sub>5</sub>H<sub>6</sub>CH<sub>2</sub>]<sup>+</sup>; δ<sub>H</sub> (CDCl<sub>3</sub>) 7.37-7.25 (5 H, m, Bn), 6.31 (1 H, dt, *J* 7.3 and 14.3, 2-H), 5.63 (1 H, dt, *J* 1.4 and 14.3, 1-H), 4.51 (2 H, s, Bn), 3.67-3.55 (2 H, m, 6-H), 3.07-2.99 (1 H, m, 4-H), 2.34-2.25 (1 H, m, 3'-H), 2.22-2.12 (1 H, m, 3''-H), 1.86-1.75 (3 H, m, 5'-H, NH<sub>2</sub>), 1.65-1.53 (1 H, m, 5''-H), 0.13 (9 H, s, Si(CH<sub>3</sub>)<sub>3</sub>). δ<sub>C</sub> (CDCl<sub>3</sub>) 145.26 (2-C), 138.36 (Bn), 131.84 (1-C), 128.31, 127.57, 127.50, 73.00 (Bn), 68.04 (6-C), 49.39 (4-C), 41.80 (3-C), 37.11 (5-C), 0.28 (Si(CH<sub>3</sub>)<sub>3</sub>).

#### ***cis*-4-Cyclopentylidenamino-6-benzyloxy-1-*C*-trimethylsilyl-1-hexene **8****

**6** (260 mg, 0.937 mmol) was dissolved in anhydrous ether (10 cm<sup>3</sup>), cyclopentanone (0.17 cm<sup>3</sup>, 1.9 mmol) and 4A mol sieves (1.22 g) were added and the mixture was stirred for 18 h. After filtration through celite and washing of the mol sieves with several ether portions, the filtrate was evaporated to dryness under reduced pressure. The residue was coevaporated with anhydrous toluene (3 x 10 cm<sup>3</sup>) and dried under high vacuum to give imine **8** (296 mg, 92%) as a colourless oil. R<sub>f</sub> (1:9 MeOH/CH<sub>2</sub>Cl<sub>2</sub> (v/v)) 0.47; δ<sub>H</sub> (CDCl<sub>3</sub>) 7.36-7.26 (5 H, m, Bn), 6.24 (1 H, dt, *J* 1.3, 6.8 and 14.1, 2-H), 5.52 (1 H, dd, *J* 1.3 and 14.3, 1-H), 4.48 (1 H, d, *J* 11.9, Bn), 4.40 (1 H, d, *J* 12.1, Bn), 3.52-3.43 (2 H, m, 4-H, 6<sub>a</sub>-H), 3.39-3.31 (1 H, m, 6<sub>b</sub>-H), 2.41-2.06 (6 H, m, 3-H, 2'-H, 5'-H), 1.97-1.89 (1 H, m, 5<sub>a</sub>-H), 1.81-1.64 (5 H, m, 5<sub>b</sub>-H, 3'-H, 4'-H), 0.11 (9 H, s, Si(CH<sub>3</sub>)<sub>3</sub>). <sup>13</sup>C NMR (CDCl<sub>3</sub>): δ 178.99 (1'-C), 145.69 (2-C), 138.46 (Bn), 130.60 (1-C), 128.23, 127.62, 127.41, 72.92 (Bn), 67.42 (6-C), 59.47 (4-C), 40.06 (3-C), 36.27, 35.83 (5-C, 2'-C/5'-C), 29.18 (2'-C/5'-C), 24.99, 24.08 (3'-C, 4'-C), 0.22 (Si(CH<sub>3</sub>)<sub>3</sub>).

#### ***cis/trans*-(2'-Benzyloxyethyl)-2-phenyl-3,4-didehydropiperidine **11A** and **11B****

**6** (109 mg, 0.39 mmol) was dissolved in anhydrous ether (5 cm<sup>3</sup>), 4A molsieves (0.92 g) and benzaldehyde (0.042 cm<sup>3</sup>, 0.41 mmol) were added and the mixture was stirred for 18 h. After filtration and washing of the mol sieves with several ether portions, the filtrate was evaporated to dryness under reduced pressure. The residue was coevaporated with anhydrous acetonitrile (3 x 10 cm<sup>3</sup>) and dried under high vacuum to give crude imine **10**. This was dissolved in anhydrous acetonitrile (7 cm<sup>3</sup>), TFA (0.15 cm<sup>3</sup>, 2.0 mmol) was added and the solution was stirred at 80°C for 70 h. The solution was cooled and evaporated to dryness under reduced pressure. The residue was dissolved in EtOAc (20 cm<sup>3</sup>) and the organic phase was washed successively with sat. aq. NaHCO<sub>3</sub> (5 cm<sup>3</sup>) and H<sub>2</sub>O (5 cm<sup>3</sup>). The combined aqueous phase was extracted with EtOAc (10 cm<sup>3</sup>) and the combined organic phase was dried (MgSO<sub>4</sub>), celite was added and the solvents were evaporated under reduced pressure. The solid residue was applied to dry column vacuum chromatography (5.0 x 2.0 cm) on silica gel eluting with a gradient of 0-100% EtOAc in hexane followed by 5-10% MeOH in CH<sub>2</sub>Cl<sub>2</sub> (v/v) to give amines **11A** and **11B** (43 mg, 37% from **6**) as light brown oils. **11A** (assignments from 1D-spectra based on assignments of **14**): R<sub>f</sub> (1:4 MeOH/CH<sub>2</sub>Cl<sub>2</sub> (v/v)) 0.71; *m/z* (EI) 292 [M-H]<sup>+</sup>, 216 [M-Ph]<sup>+</sup>, 158 [M-BnOCH<sub>2</sub>CH<sub>2</sub>]<sup>+</sup>, 91 [C<sub>5</sub>H<sub>6</sub>CH<sub>2</sub>]<sup>+</sup>; δ<sub>H</sub> (CDCl<sub>3</sub>, selected signals) 7.37-7.25 (10 H, m, Ph, Bn), 5.91-5.83 (1 H, m, 3-H), 5.72-5.67 (1 H, m, 4'-H), 4.53 (1 H, bs, 2-H), 4.50 (2 H, s, OBn), 3.64-3.59 (2 H, m, 2'-H), 3.20-3.11 (1 H, m, 6-H), 2.19-1.59 (5 H, m, NH, 5-H, 1'-H). δ<sub>C</sub> (CDCl<sub>3</sub>) 143.83 (Ph), 138.37 (Bn), 130.30 (4-C), 128.45, 128.34, 127.66, 127.59, 127.52, 127.24 (Ph, Bn), 125.78 (3-C), 72.95 (OBn), 68.00 (2'-C), 60.15 (2-C), 52.24 (6-C), 36.36, 32.25 (5-C, 1'-C). **11B** (assignments from 1D <sup>13</sup>C-spectrum based on assignments of **14**): R<sub>f</sub> (1:4 MeOH/CH<sub>2</sub>Cl<sub>2</sub> (v/v)) 0.63; *m/z* (EI) 292 [M-H]<sup>+</sup>, 216 [M-Ph]<sup>+</sup>, 158 [M-BnOCH<sub>2</sub>CH<sub>2</sub>]<sup>+</sup>, 91 [C<sub>5</sub>H<sub>6</sub>CH<sub>2</sub>]<sup>+</sup>; δ<sub>C</sub> (CDCl<sub>3</sub>) 141.10, 139.86, 137.89, 137.67, 128.78, 128.67, 128.56, 128.50, 128.36, 128.10, 127.99, 127.85, 127.76, 127.66, 127.63, 126.64, 125.45 (Ph, Bn, 3-C, 4-C), 73.20 (OBn), 68.13 (2'-C), 55.75 (2-C), 46.93 (6-C), 33.83, 30.42 (5-C, 1'-C).

***cis*-4-Benzylidenamino-6-benzyloxy-1-*C*-trimethylsilyl-1-hexene 10**

**6** (926 mg, 3.34 mmol) was dissolved in anhydrous ether (50 cm<sup>3</sup>), 4A molsieves (1.945 g) and benzaldehyde (0.40 cm<sup>3</sup>, 3.9 mmol) were added and the mixture was stirred for 14 h. After filtration and washing of the mol sieves with several ether portions, the filtrate was evaporated to dryness under reduced pressure. The residue was coevaporated with anhydrous acetonitrile (10 cm<sup>3</sup>) and dried under high vacuum to give a mixture of imine **10** and PhCHO (5:1, 1510 mg) as a colourless oil.  $R_f$  (1:9 MeOH/CH<sub>2</sub>Cl<sub>2</sub> (v/v)) 0.87;  $\delta_H$  (CDCl<sub>3</sub>) 8.21 (1 H, s, RN=CHPh), 7.91-7.26 (10 H, m, Ph, Bn), 6.28 (1 H, dt,  $J$  7.2 and 14.3, 2-H), 5.57 (1 H, d,  $J$  14.1, 1-H), 4.51 (1 H, d,  $J$  12.1, Bn), 4.41 (1 H, d,  $J$  12.1, Bn), 3.56-3.38 (3 H, m, 4-H, 6-H), 2.50 (2 H, t,  $J$  7.1, 3-H), 2.11-1.90 (2 H, m, 5-H), 0.13 (9 H, s, Si(CH<sub>3</sub>)<sub>3</sub>).  $\delta_C$  (CDCl<sub>3</sub>) 160.32 (PhHC=NR), 145.30 (2-C), 138.48, 136.38, 136.08, 134.33, 131.06, 130.41, 129.64, 128.90, 128.40, 128.23, 128.18, 127.57, 127.40 (Ph, Bn, 1-C), 72.85 (Bn), 68.05 (4-C), 67.17 (6-C), 40.12 (3-C), 35.63 (5-C), 0.17 (Si(CH<sub>3</sub>)<sub>3</sub>).

***cis*-4-(*N*-Benzyl)amino-6-benzyloxy-1-*C*-trimethylsilyl-1-hexene **7****

Crude **10** (3.34 mmol) was dissolved in anhydrous THF/MeOH (3:1 (v/v), 40 cm<sup>3</sup>) at 0°C, NaBH<sub>4</sub> (259 mg, 6.85 mmol) was added and the solution was stirred at 0°C for 2 h. AcOH (1.5 cm<sup>3</sup>, 26 mmol) followed by NaHCO<sub>3</sub>(s) (2003 mg, 23.8 mmol) was carefully added. Celite was added and the solvents were evaporated under reduced pressure. The solid residue was applied to dry column vacuum chromatography (4.8 x 5.5 cm) on silica gel eluting with a gradient of 0-35% EtOAc in hexane (v/v) followed by 2.5:30:67.5 Et<sub>3</sub>N/EtOAc/hexane (v/v/v) and then 35-50% EtOAc in hexane (v/v) to give benzylamine **7** (886 mg, 72% from **6**) as a colourless oil (Found: C, 75.4; H, 8.9; N, 3.8. Calcd. for C<sub>23</sub>H<sub>33</sub>NOSi: C, 75.2; H, 9.1; N, 3.8) after coevaporation with anhydrous acetonitrile (2 x 20 cm<sup>3</sup>).  $R_f$  (1:1 EtOAc/hexane (v/v)) 0.53;  $m/z$  (EI) 352 [M-CH<sub>3</sub>]<sup>+</sup>, 254 [M-Me<sub>3</sub>SiCH=CHCH<sub>2</sub>]<sup>+</sup>, 91 [C<sub>5</sub>H<sub>6</sub>CH<sub>2</sub>]<sup>+</sup>;  $\delta_H$  (CDCl<sub>3</sub>) 7.37-7.21 (10 H, m, Bn), 6.32 (1 H, dt,  $J$  7.1 and 14.3, 2-H), 5.62 (1 H, dt,  $J$  1.5 and 14.3, 1-H), 4.50 (2 H, s, OBn), 3.83 (1 H, d,  $J$  13.0, NBn), 3.76



(1 H, d,  $J$  13.2, NBn), 3.67-3.54 (2 H, m, 6-H), 2.84 (1 H, p,  $J$  6.2, 4-H), 2.43-2.24 (2 H, m, 3-H), 1.82-1.75 (2 H, m, 5-H), 1.60 (1 H, bs, NH), 0.14 (9 H, s, Si(CH<sub>3</sub>)<sub>3</sub>).  $\delta_C$  (CDCl<sub>3</sub>) 145.50 (2-C), 140.78, 138.43 (Bn), 131.36 (1-C), 128.25, 128.05, 127.57, 127.44, 126.71 (Bn), 73.02 (OBn), 68.24 (6-C), 55.24 (4-C), 51.40 (NBn), 38.28 (3-C), 34.17 (5-C), 0.23 (Si(CH<sub>3</sub>)<sub>3</sub>).

### ***N*-Benzyl-(2'-benzyloxyethyl)-3,4-didehydropiperidine 12**

**7** (85 mg, 0.23 mmol) was dissolved in anhydrous acetonitrile (7 cm<sup>3</sup>), paraformaldehyde (218 mg, 7.3 mmol) and (1S)-(+)-camphor-10-sulfonic acid monohydrate (CSA, 54.1 mg, 0.23 mmol) were added and the solution was stirred at reflux for 19 h, cooled and evaporated to dryness under reduced pressure. The residue was dissolved in EtOAc (20 cm<sup>3</sup>), washed successively with sat. aq. NaHCO<sub>3</sub> (5 cm<sup>3</sup>) and H<sub>2</sub>O (5 cm<sup>3</sup>), dried (MgSO<sub>4</sub>), celite was added and the solvents were evaporated under reduced pressure. The solid residue was applied to dry column vacuum chromatography (5.0 x 2.0 cm) on silica gel eluting with a gradient of 0-50% EtOAc in hexane (v/v) to give amine **12** (51 mg, 72%) as a colourless oil.  $R_f$  (1:1 EtOAc/hexane) 0.40;  $m/z$  (EI) 307 [M]<sup>+</sup>, 306 [M-H]<sup>+</sup>, 216 [M-PhCH<sub>2</sub>]<sup>+</sup>, 172 [M-BnOCH<sub>2</sub>CH<sub>2</sub>]<sup>+</sup>, 91 [C<sub>5</sub>H<sub>6</sub>CH<sub>2</sub>]<sup>+</sup>;  $\delta_H$  (CDCl<sub>3</sub>) 7.32-7.19 (10 H, m, Bn), 5.74-5.69 (1 H, m, 3-H), 5.60-5.56 (1 H, m, 4-H), 4.48 (2 H, s, OBn), 3.64 (2 H, s, NBn), 3.56 (2 H, dd,  $J$  6.6 and 13.4, 2'-H), 3.03-2.97 (3 H, m, 2-H, 6-H), 2.28 (1 H, dp,  $J$  2.7 and 17.6, 5<sub>a</sub>-H), 2.03-1.91 (1 H, m, 1'<sub>a</sub>-H), 1.94-1.84 (1 H, m, 5<sub>b</sub>-H), 1.74-1.62 (1 H, m, 1'<sub>b</sub>-H).  $\delta_C$  (CDCl<sub>3</sub>) 139.69, 138.55, 128.72, 128.27, 128.10, 127.54, 127.41, 126.69 (Bn), 125.01 (4-C), 124.14 (3-C), 72.93 (BnO), 68.20 (2'-C), 56.38 (BnN), 52.80 (6-C), 47.80 (2-C), 29.07 (1'-C), 27.94 (5-C).

### ***trans*-N-Benzyl-(2'-benzyloxyethyl)-2-(*n*-hexyl)-3,4-didehydropiperidine 13**

**7** (103 mg, 0.28 mmol) was dissolved in anhydrous acetonitrile (2.5 cm<sup>3</sup>), heptanal (0.20 cm<sup>3</sup>, 1.43 mmol) and CSA (65 mg, 0.28 mmol) were added and the mixture was stirred at 120°C in a pressure

bottle for 70 h. After cooling, sat. aq. NaHCO<sub>3</sub> (0.25 cm<sup>3</sup>) and celite were added and the solvents were evaporated under reduced pressure. The solid residue was applied twice to dry column vacuum chromatography (5.2 x 2.0 cm) on silica gel eluting with CH<sub>2</sub>Cl<sub>2</sub> followed by a gradient of 0-10% EtOAc in hexane (v/v) to give amine **13** (32 mg, 29%) as a light yellow oil after coevaporation with hexane (10 cm<sup>3</sup>). R<sub>f</sub> (1:9 EtOAc/hexane (v/v)) 0.24; *m/z* (EI) 391 [M]<sup>+</sup>, 390 [M-H]<sup>+</sup>, 306 [M-C<sub>6</sub>H<sub>13</sub>]<sup>+</sup>, 300 [M-PhCH<sub>2</sub>]<sup>+</sup>, 256 [M-BnOCH<sub>2</sub>CH<sub>2</sub>]<sup>+</sup>, 91 [C<sub>5</sub>H<sub>6</sub>CH<sub>2</sub>]<sup>+</sup>; δ<sub>H</sub> (CDCl<sub>3</sub>, selected signals) 7.37-7.22 (10 H, m, Bn), 5.81 (1 H, dt, *J* 2.2 and 10.0, 3-H), 5.60 (1 H, dt, *J* 1.6 and 10.2, 4-H), 4.58 (1 H, d, *J* 11.9, OBn), 4.52 (1 H, d, *J* 11.9, OBn), 3.77 (1 H, d, *J* 13.7, NBn), 3.72-3.66 (2 H, m, 2'-H), 3.38 (1 H, d, *J* 13.7, NBn), 3.25 (1 H, septet, *J* 4.8, 6-H), 2.87 (1 H, bs, 2-H), 2.06-1.87 (2 H, m, 1'<sub>a</sub>-H, 5<sub>a</sub>-H), 1.84-1.72 (2 H, m, 1'<sub>b</sub>-H, 5<sub>b</sub>-H), 1.58-1.44 (2 H, m, 1''-H), 1.39-1.04 (8 H, m, 2''-H, 3''-H, 4''-H, 5''-H), 0.86 (3 H, t, *J* 6.8, 6''-H). δ<sub>C</sub> (CDCl<sub>3</sub>, selected signals) 140.92, 138.62 (Bn), 129.78 (4-C), 128.72, 128.40, 128.27, 127.90, 127.63, 127.57, 127.41, 126.38 (Bn), 124.99 (3-C), 73.06 (OBn), 68.07 (2'-C), 56.86 (2-C), 49.63 (NBn), 48.32 (6-C), 34.02 (1''-C), 32.25 (1'-C), 31.89 (2''-C), 29.22 (3''-C), 26.91 (5-C), 26.29 (4''-C), 22.65 (5''-C), 14.11 (6''-C).

#### 4-(*N*-Benzyl)amino-6-benzyloxy-1-hexene **15B**

**7** (51.1 mg, 0.14 mmol) was dissolved in anhydrous acetonitrile (2.5 cm<sup>3</sup>), cyclopentanone (0.075 cm<sup>3</sup>, 0.85 mmol) and triflic acid (21.8 mg, 0.145 mmol) were added and the mixture was stirred at 120°C in a pressure bottle for 40 h. After cooling, sat. aq. NaHCO<sub>3</sub> (0.25 cm<sup>3</sup>) and celite were added and the solvents were evaporated under reduced pressure. The solid residue was applied to dry column vacuum chromatography (5.7 x 2.0 cm) on silica gel eluting with a gradient of 0-100% EtOAc in hexane (v/v) to give alkene **15B** (31 mg, 75%) as a colourless oil. R<sub>f</sub> (1:1 EtOAc/hexane (v/v)) 0.12; *m/z* (EI) 296 [M+H]<sup>+</sup>, 294 [M-H]<sup>+</sup>, 254 [M-CH<sub>2</sub>=CHCH<sub>2</sub>]<sup>+</sup>, 160 [M-BnOCH<sub>2</sub>CH<sub>2</sub>]<sup>+</sup>, 91 [C<sub>5</sub>H<sub>6</sub>CH<sub>2</sub>]<sup>+</sup>; δ<sub>H</sub> (CDCl<sub>3</sub>) 7.34-7.22 (10 H, m, Bn), 5.87-5.73 (1 H, m, 2-H), 5.13-5.09 (1 H, m, 1'-

H), 5.07 (1 H, t,  $J$  1.1, 1''-H), 4.50 (2 H, s, OBn), 3.82 (1 H, d,  $J$  13.0, NBn), 3.75 (1 H, d,  $J$  12.8, NBn), 3.67-3.54 (2 H, m, 6-H), 2.83 (1 H, p,  $J$  6.0, 4-H), 2.29-2.24 (2 H, m, 3-H), 1.78 (2 H, q,  $J$  6.2, 5-H), 1.66 (1 H, bs, NH).  $\delta_C$  (CDCl<sub>3</sub>) 140.70, 138.46 (Bn), 135.44 (2-C), 128.27, 128.10, 127.57, 127.44, 126.74 (Bn), 117.28 (1-C), 72.99 (OBn), 68.08 (6-C), 54.36 (4-C), 51.17 (NBn), 38.64 (3-C), 33.99 (5-C).

***cis*-4-[(*N*-Benzyl)-{*N*-(*R,S*)-(2-phenyl)-acetonitrile}]amino-6-benzyloxy-1-*C*-trimethylsilyl-1-hexene **16****

**7** (124 mg, 0.34 mmol), benzaldehyde (0.050 cm<sup>3</sup>, 0.49 mmol) and KCN (33 mg, 0.51 mmol) were dissolved in anhydrous MeOH (5 cm<sup>3</sup>), AcOH (0.07 cm<sup>3</sup>, 1.2 mmol) was added and the solution was stirred at 60°C for 27 h. After cooling, celite was added and the solvents were evaporated under reduced pressure. The solid residue was coevaporated with anhydrous acetonitrile (20 cm<sup>3</sup>) and applied to dry column vacuum chromatography (3.9 x 3.3 cm) on silica gel eluting with a gradient of 0-20% EtOAc in hexane (v/v) to give diastereomeric nitriles **16** (137 mg, 84%) as a colourless oil.  $R_f$  (1:3 EtOAc/hexane (v/v)) 0.60;  $m/z$  (EI) 482 [M]<sup>+</sup>, 467 [M-CH<sub>3</sub>]<sup>+</sup>, 369 [M-Me<sub>3</sub>SiCH=CHCH<sub>2</sub>]<sup>+</sup>, 91 [C<sub>5</sub>H<sub>6</sub>CH<sub>2</sub>]<sup>+</sup>;  $\delta_H$  (CDCl<sub>3</sub>) 7.49-7.17 (30 H, m, Ph, Bn), 6.13-5.98 (2 H, m, 2-H, 2'-H), 5.55 (1 H, dd,  $J$  1.1 and 14.1, 1-H), 5.47 (1 H, dt,  $J$  1.6 and 14.3, 1'-H), 4.86 (2 H, 2s,  $\alpha$ -H,  $\alpha'$ -H), 4.50 (1 H, d,  $J$  11.9, OBn), 4.42 (1 H, d,  $J$  11.9, OBn), 4.28 (1 H, d,  $J$  11.9, OBn'), 4.20 (1 H, d,  $J$  12.1, OBn'), 3.89 (1 H, d,  $J$  13.6, NBn), 3.85 (1 H, d,  $J$  13.7, NBn'), 3.71 (1 H, d,  $J$  13.6, NBn), 3.70 (1 H, d,  $J$  13.7, NBn'), 3.59-3.52 (1 H, m), 3.49-3.41 (2 H, m) (2 x 6-H, 6'-H), 3.14-3.06 (1 H, m, 6'-H), 3.05-2.95 (2 H, m), 2.88 (1 H, tt,  $J$  3.5 and 10.1) (3'-H, 4-H, 4'-H), 2.53-2.42 (1 H, m, 5'-H), 2.33-2.22 (3 H, m, 2 x 3-H, 3'-H), 1.82-1.54 (3 H, m, 2 x 5-H, 5'-H), 0.13 (9 H, s, Si(CH<sub>3</sub>)<sub>3</sub>), 0.00 (9 H, s, Si(CH<sub>3</sub>)<sub>3</sub>').  $\delta_C$  (CDCl<sub>3</sub>) 146.39, 145.32 (2-C, 2'-C), 138.36, 137.96, 137.82 (Bn), 134.28, 134.19 (Ph), 131.32, 129.81 (1-C, 1'-C), 129.06, 128.98, 128.60, 128.57, 128.43, 128.36, 128.27, 128.20, 128.03, 127.55, 127.44, 127.39, 127.36 (Bn, Ph), 118.15, 117.97 (CN,

CN'), 72.73 (OBn, OBn'), 67.96, 67.63 (6-C, 6'-C), 54.99, 54.52 (4-C, 4'-C), 54.30, 53.88 ( $\alpha$ -C,  $\alpha'$ -C), 50.93, 50.62 (NBn, NBn'), 35.63 (3-C), 32.95 (3'-C), 31.79 (5-C), 29.44 (5'-C), 0.22, 0.041 ((Si(CH<sub>3</sub>)<sub>3</sub>), (Si(CH<sub>3</sub>)<sub>3</sub>)).

***trans*-N-Benzyl-(2'-benzyloxyethyl)-2-phenyl-3,4-didehydropiperidine 14**

**16** (137 mg, 0.28 mmol) was dissolved in anhydrous acetonitrile (2.5 cm<sup>3</sup>), AgBF<sub>4</sub> (57 mg, 0.29 mmol) was added and the mixture was stirred at 120°C in a pressure bottle for 20 h. After cooling, sat. aq. NaHCO<sub>3</sub> (0.25 cm<sup>3</sup>) and celite were added and the solvents were evaporated under reduced pressure. The solid residue was applied to dry column vacuum chromatography (5.3 x 2.0 cm) on silica gel eluting with a gradient of 0-40% EtOAc in hexane (v/v) to give piperidine **16** (50.4 mg, 46%) and amine **7** (14.6 mg, 14%) as colourless oils. **16**: R<sub>f</sub> (1:9 EtOAc/hexane (v/v)) 0.25; *m/z* (EI) 383 [M]<sup>+</sup>, 382 [M-H]<sup>+</sup>, 292 [M-PhCH<sub>2</sub>]<sup>+</sup>, 248 [M-BnOCH<sub>2</sub>CH<sub>2</sub>]<sup>+</sup>, 91 [C<sub>5</sub>H<sub>6</sub>CH<sub>2</sub>]<sup>+</sup>;  $\delta_{\text{H}}$  (CDCl<sub>3</sub>) 7.44-7.23 (15 H, m, Ph, Bn), 5.92 (1 H, ddt, *J* 1.6, 3.7 and 10.1, 4-H), 5.77 (1 H, ddt, *J* 1.8, 3.0 and 9.9, 3-H), 4.46 (1 H, d, *J* 11.7, OBn), 4.40 (1 H, d, *J* 11.7, OBn), 4.15 (1 H, bs, 2-H), 3.69 (1 H, d, *J* 13.7, NBn), 3.59 (1 H, d, *J* 13.2, NBn), 3.54 (2 H, dt, *J* 1.3 and 6.8, 2'-H), 3.14-3.06 (1 H, m, 6-H), 2.22 (1 H, d(sextet), *J* 2.6 and 17.6, 5<sub>a</sub>-H), 2.11-2.00 (2 H, m, 1'<sub>a</sub>-H, 5<sub>b</sub>-H), 1.83-1.72 (1 H, m, 1'<sub>b</sub>-H).  $\delta_{\text{C}}$  (CDCl<sub>3</sub>) 143.54 (Ph), 140.31, 138.51 (Bn), 128.73, 128.60, 128.39, 128.23, 128.09, 128.05, 127.57, 127.36, 126.73, 126.60 (Bn, Ph, 4-C), 124.76 (3-C), 72.89 (OBn), 68.41 (2'-C), 60.90 (2-C), 51.32 (NBn), 48.51 (6-C), 28.44, 28.23 (5-C, 1'-C).

S1 D. S. Pedersen, C. Rosenbohm, *Synthesis*, 2001, 2431-2434

S2 T. Ooi, N. Kagoshima, H. Ichikawa, K. Maruoka, *J. Am. Chem. Soc.*, 1999, **121**, 3328-3333

S3 T. Ooi, J. Morikawa, H. Ichikawa, K. Maruoka, *Tetrahedron Lett.*, 1999, **40**, 5881-5884

S4 B. Lygo, *Tetrahedron*, 1988, **44**, 6889-6896
